# Supplementary material for: Computational mapping of redox-switchable metal complexes based on ferrocene derivatives
Source: Royal Society of Chemistry journal article supplement (doi:10.1039/c9cc01977d), 2019-01-01
Supplement: c9cc01977d1.pdf [file c9cc01977d1.pdf]

# Computational Mapping of Redox-Switchable Metal Complexes Based on Ferrocene Derivatives

## Electronic Supporting Information

Amy Lai, Jamie Clifton, Paula L. Diaconescu,\* Natalie Fey\*

### Contents

|                                                                                                                                                                  |    |
|------------------------------------------------------------------------------------------------------------------------------------------------------------------|----|
| Computational details .....                                                                                                                                      | 2  |
| <b>Table S1:</b> List of metal complexes considered and labels. General format L#_M_R_R'/R'' .....                                                               | 4  |
| Database design .....                                                                                                                                            | 6  |
| <b>Table S2:</b> Conformational search results for L1_Y_3c .....                                                                                                 | 7  |
| Descriptors: .....                                                                                                                                               | 8  |
| <b>Figure S1:</b> PC1 and PC2 score plot treating each oxidation state as a separate entry. ....                                                                 | 9  |
| <b>Table S3:</b> Descriptor labels, details, and standard descriptive statistics. ....                                                                           | 10 |
| <b>Table S4:</b> Correlations >0.6.....                                                                                                                          | 11 |
| PCA results.....                                                                                                                                                 | 12 |
| <b>Table S5:</b> Autofit diagnostics: .....                                                                                                                      | 12 |
| Descriptor loadings.....                                                                                                                                         | 13 |
| <b>Figure S2:</b> Descriptor loadings plot, PC1 and PC2.....                                                                                                     | 13 |
| <b>Table S6:</b> Descriptor loadings, PC1-4. ....                                                                                                                | 13 |
| <b>Figure S3:</b> PC1 and PC2 score plot, short labels, coloured by L (Table S1). ....                                                                           | 14 |
| <b>Figure S4:</b> PC1 and PC2 score plot, short labels, coloured by M (Table S1). ....                                                                           | 14 |
| <b>Figure S5:</b> PC1 and PC2 score plot, overview, full labels, coloured by L (Table S1). ....                                                                  | 15 |
| <b>Figure S6:</b> PC1 and PC2 score plot. Symbols marked in bright red correspond to metal complexes found active in ring-opening polymerisation catalysis. .... | 15 |
| <b>Figure S7:</b> PC1 and PC2 score plot, upper left quadrant, full labels, coloured by L (Table S1). ....                                                       | 16 |
| <b>Figure S8:</b> PC1 and PC2 score plot, lower left quadrant, full labels, coloured by L (Table S1). ....                                                       | 16 |
| <b>Figure S9:</b> PC1 and PC2 score plot, upper right quadrant, full labels, coloured by L (Table S1). ....                                                      | 17 |
| <b>Figure S11:</b> PC1 and PC3 score plot, short labels, coloured by L (Table S1). ....                                                                          | 18 |
| References .....                                                                                                                                                 | 19 |
| XYZ coordinates for representative complexes .....                                                                                                               | 20 |

## Computational details

DFT calculations were performed in Jaguar 8.5<sup>1</sup> and used the standard B3PW91 density functional.<sup>2</sup> The triple-zeta form of the standard Los Alamos ECP basis set (LACV3P) as implemented in Jaguar was used on the transition metal atoms, employing the 6-31G\* basis with five spherical harmonic components of the polarization functions for all other atoms. All optimisations were run as unrestricted, as these showed better convergence behaviour for the oxidised metal complexes; trial calculations with spin-restricted open shell DFT (ROB3PW91) repeatedly failed to converge. “Loose” convergence (five times larger than default criteria) was used for optimizations. Test calculations using default criteria did not lead to significant changes in geometries, but were more time-consuming. Calculations were performed on isolated molecules and NBO atomic charges were calculated.<sup>3</sup> Vibrational frequencies were not computed; complex effects on zero-point and free energy corrections are likely to be small and have been neglected. Stationary points have not been routinely verified as minima but accidental optimisation to transition states seems unlikely for complexes of low symmetry. Trial calculations on two compounds, L1\_Y\_3a and L4\_Al\_1d in both oxidation states showed a small negative frequency for the Fe(III) version of L4\_Al\_1d, likely an artefact of the computational methodology and loose convergence used, while the other compounds were confirmed as true minima. The impact on the energy differences between oxidation states was small in both cases, for L1\_Y\_3a  $\Delta E = 118.7 \text{ kcal mol}^{-1}$ ,  $\Delta G = 119.2 \text{ kcal mol}^{-1}$  and for L4\_Al\_1d,  $\Delta E = 150.9 \text{ kcal mol}^{-1}$ ,  $\Delta G = 148.6 \text{ kcal mol}^{-1}$ . Principal component analyses were performed in SIMCA,<sup>4</sup> while all other data analysis used MS Excel.

As these compounds are similar across different metals and oxidation states; here, we supply xyz coordinates for a subset of optimised geometries for representative compounds, along with all processed descriptor data and PC scores.

**Table S1:** List of metal complexes considered and labels. General format L#\_M\_R\_R'/R''.

a R' = R'' = H

b R' = R'' = Me

c R' = R'' = tBu

d R' = tBu, R'' = H

e R' = CF<sub>3</sub>, R'' = H

M = Al(OMe), Sc(OMe), Ti(OMe)<sub>2</sub>, Y(OMe), Zr(OMe)<sub>2</sub>, In(OMe), Hf(OMe)<sub>2</sub>

| Complex                                                                                       | Variations                                                                                                                                                                                                                                                               | Included                                                                                                                                                                                                                                                                                                  | Short label                                                                                                                                     |
|-----------------------------------------------------------------------------------------------|--------------------------------------------------------------------------------------------------------------------------------------------------------------------------------------------------------------------------------------------------------------------------|-----------------------------------------------------------------------------------------------------------------------------------------------------------------------------------------------------------------------------------------------------------------------------------------------------------|-------------------------------------------------------------------------------------------------------------------------------------------------|
| 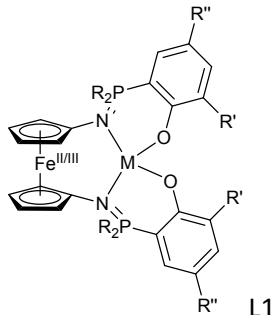 <p>L1</p>   | _1 PH <sub>2</sub><br>_2 PMe <sub>2</sub><br>_3 PPh <sub>2</sub><br>_4 PtBu <sub>2</sub><br>_5 PiPr <sub>2</sub><br>_6 P(CF <sub>3</sub> ) <sub>2</sub><br>_7 P(OMe) <sub>2</sub><br>_8 P(OPh) <sub>2</sub><br><br>a R' = R'' = H<br>b R' = R'' = Me<br>c R' = R'' = tBu | L1_Al_1a<br>L1_Al_1c<br>L1_Al_3c<br>L1_Sc_1c<br>L1_Sc_3c<br>L1_Ti_1a<br>L1_Ti_3c<br>L1_Y_1a<br>L1_Y_1b<br>L1_Y_1c<br>L1_Y_2a<br>L1_Y_3a<br>L1_Y_3c<br>L1_Y_4a<br>L1_Y_5a<br>L1_Y_6a<br>L1_Y_7a<br>L1_Y_8a<br>L1_Zr_1a<br>L1_Zr_2a<br>L1_Zr_3a<br>L1_Zr_3c<br>L1_In_1a<br>L1_In_1c<br>L1_In_3c<br>L1_Hf_3c | 1<br>2<br>3<br>4<br>5<br>6<br>7<br>8<br>9<br>10<br>11<br>12<br>13<br>14<br>15<br>16<br>17<br>18<br>19<br>20<br>21<br>22<br>23<br>24<br>25<br>26 |
|  <p>L2</p> | _1 R = H<br><br>a R' = R'' = H                                                                                                                                                                                                                                           | L2_Y_1a                                                                                                                                                                                                                                                                                                   | 27                                                                                                                                              |

| Complex                                                                                                                  | Variations                                                                                               | Included                                                                                                                                                                                                                                                                     | Short label                                                                                                                                                               |
|--------------------------------------------------------------------------------------------------------------------------|----------------------------------------------------------------------------------------------------------|------------------------------------------------------------------------------------------------------------------------------------------------------------------------------------------------------------------------------------------------------------------------------|---------------------------------------------------------------------------------------------------------------------------------------------------------------------------|
| 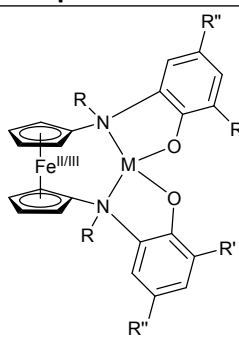 <p style="text-align: right;">L3</p>   | <p>_1 R = H</p> <p>d R' = tBu, R'' = H</p>                                                               | <p>L3_Al_1d</p> <p>L3_Sc_1d</p> <p>L3_Ti_1d</p> <p>L3_Y_1d</p> <p>L3_Zr_1d</p> <p>L3_Hf_1d</p>                                                                                                                                                                               | <p>28</p> <p>29</p> <p>30</p> <p>31</p> <p>32</p> <p>33</p>                                                                                                               |
|  <p style="text-align: right;">L4</p>   | <p>_1 R = H</p> <p>c R' = R'' = tBu</p> <p>d R' = tBu, R'' = H</p> <p>e R' = CF<sub>3</sub>, R'' = H</p> | <p>L4_Al_1c</p> <p>L4_Al_1d</p> <p>L4_Al_1e</p> <p>L4_Sc_1d</p> <p>L4_Ti_1c</p> <p>L4_Ti_1d</p> <p>L4_Ti_1e</p> <p>L4_Y_1c</p> <p>L4_Y_1d</p> <p>L4_Y_1e</p> <p>L4_Zr_1c</p> <p>L4_Zr_1d</p> <p>L4_Zr_1e</p> <p>L4_In_1c</p> <p>L4_In_1d</p> <p>L4_Hf_1c</p> <p>L4_Hf_1d</p> | <p>34</p> <p>35</p> <p>36</p> <p>37</p> <p>38</p> <p>39</p> <p>40</p> <p>41</p> <p>42</p> <p>43</p> <p>44</p> <p>45</p> <p>46</p> <p>47</p> <p>48</p> <p>49</p> <p>50</p> |
|  <p style="text-align: right;">L5</p> | <p>a R' = R'' = H</p> <p>c R' = R'' = tBu</p>                                                            | <p>L5_Ti_a</p> <p>L5_Ti_c</p> <p>L5_Y_c</p> <p>L5_Zr_a</p> <p>L5_Zr_c</p> <p>L5_Hf_c</p>                                                                                                                                                                                     | <p>51</p> <p>52</p> <p>53</p> <p>54</p> <p>55</p> <p>56</p>                                                                                                               |
|  <p style="text-align: right;">L6</p> | <p>a R' = R'' = H</p> <p>c R' = R'' = tBu</p>                                                            | <p>L6_Al_c</p> <p>L6_Sc_c</p> <p>L6_Ti_a</p> <p>L6_Ti_c</p> <p>L6_Y_a</p> <p>L6_Zr_a</p> <p>L6_Zr_c</p> <p>L6_Hf_c</p>                                                                                                                                                       | <p>57</p> <p>58</p> <p>59</p> <p>60</p> <p>61</p> <p>62</p> <p>63</p> <p>64</p>                                                                                           |

## Database design

Starting geometries were derived from available crystal structures, changing substituents and metals to access the variations considered here. This approach does not include an exploration of accessible conformers, which may affect some of the substituents and methoxy group placement. However, the metallocene poses problems to standard molecular mechanics approaches - there are multiple ways of dealing with  $\pi$ -coordination of ligands (for an early review, see: N. Fey, "Organometallic molecular modelling – the computational chemistry of metallocenes: a review", *J. Chem. Technol. Biotechnol.*, 1999, 852-862). Arguably, with all ligands coordinated to a second metal centre, treating the ferrocene backbone appropriately is less important here, but it can affect the resilience and speed of conformational searches if the routine to generate new conformers (most commonly, random coordinate changes and rotation around suitable bonds) produces challenging starting geometries. Furthermore, a large-scale search was not feasible without detailed parameterisation, especially for some of the less commonly used metal cations, which lay outside the scope of the present work. Such considerations notwithstanding, there is no reason to expect the molecular mechanics (MM) and DFT potential energy surfaces to be similar, so the lowest energy conformer found with MM is not necessarily optimal for DFT, necessitating extensive sampling of conformers. This is indeed the case for an example investigated here, L1\_Y\_3c, see Table S2.

The lowest MM structure is highest in terms of DFT potential energy (incidentally, the geometry used for the database is very close to the lowest energy found). This can be addressed by more extensive sampling, but the computational effort escalates quickly. The key here is that we are comparing similar systems and not measuring "softer" changes in dihedral angles. The descriptors used are unlikely to be affected substantially by such conformational changes and it is our assessment that the impact on the descriptors is relatively small in the present case. Most of the data extracted are distances, and here conformational noise gives a standard deviation of less than 0.01 Å for the case of L1\_Y\_3c, much smaller than the range and STD for the database (as shown in Table S3 below). Clearly, there will be an effect on the energy difference ( $\Delta E$ ) between oxidation states as well, but the differences for different metals are again more substantial than the noise likely to be introduced by working with data for a high energy conformer in one or both oxidation states.

The limiting assumption of this work is that the coordination chemistry and conformational preferences will be similar even as metals and substituents are altered. Recent work on Zr complexes<sup>5</sup> indicates that isomerisation could occur during catalysis; this has not been considered in the present case and would indeed be difficult to capture reliably in a descriptor database.

**Table S2:** Conformational search results for L1\_Y\_3c

| No.      | rel. E,<br>MM | rel. E,<br>DFT | M-D1<br>(Fe2) | M-D2<br>(Fe2) | M-OMe<br>(Fe2) | Fe-C  | D1-R<br>(Fe2) | D2-R<br>(Fe2) | RDR<br>(Fe2) | Q(M)<br>(Fe2) | Q(OMe)<br>(Fe2) | $\Delta E$<br>(same<br>conf) |
|----------|---------------|----------------|---------------|---------------|----------------|-------|---------------|---------------|--------------|---------------|-----------------|------------------------------|
| original | N/A           | -7.54          | 2.414         | 2.201         | 2.061          | 2.048 | 1.522         | 1.314         | 117.9        | 2.2155        | -0.7536         | 118.4                        |
| 1        | 0.00          | 0.00           | 2.413         | 2.199         | 2.055          | 2.052 | 1.515         | 1.305         | 119.4        | 2.1684        | -0.7389         | 119.2                        |
| 2        | 0.28          | -3.28          | 2.415         | 2.211         | 2.050          | 2.044 | 1.522         | 1.308         | 116.3        | 2.1972        | -0.7418         |                              |
| 3        | 0.94          | -7.72          | 2.427         | 2.200         | 2.047          | 2.048 | 1.520         | 1.312         | 119.1        | 2.1987        | -0.7487         | 118.5                        |
| 4        | 1.08          | -6.92          | 2.445         | 2.196         | 2.060          | 2.052 | 1.517         | 1.316         | 119.2        | 2.2160        | -0.7584         |                              |
| 5        | 1.11          | -2.15          | 2.433         | 2.215         | 2.044          | 2.045 | 1.520         | 1.311         | 117.8        | 2.2143        | -0.7428         |                              |
| 6        | 1.53          | -6.66          | 2.422         | 2.204         | 2.046          | 2.046 | 1.523         | 1.311         | 116.4        | 2.2108        | -0.7494         |                              |
| 7        | 1.78          | -5.16          | 2.422         | 2.195         | 2.049          | 2.048 | 1.521         | 1.310         | 118.9        | 2.2006        | -0.7518         |                              |
| 8        | 4.46          | -4.95          | 2.428         | 2.202         | 2.047          | 2.048 | 1.521         | 1.312         | 119.0        | 2.2038        | -0.7522         |                              |
| 9        | 4.59          | -3.79          | 2.426         | 2.219         | 2.044          | 2.045 | 1.520         | 1.312         | 118.1        | 2.2171        | -0.7445         |                              |
|          |               |                |               |               |                |       |               |               |              |               |                 |                              |
| Mean     |               |                | 2.425         | 2.204         | 2.050          | 2.048 | 1.520         | 1.311         | 118.2        | 2.2042        | -0.7482         |                              |
| STD      |               |                | 0.010         | 0.008         | 0.006          | 0.003 | 0.002         | 0.003         | 1.1          | 0.0147        | 0.0061          |                              |

Calculations focussed on compounds of the following metals: Al<sup>3+</sup>, Sc<sup>3+</sup>, Ti<sup>4+</sup>, Y<sup>3+</sup>, Zr<sup>4+</sup>, In<sup>3+</sup>, Hf<sup>4+</sup>, and the supporting ligand structures as shown in Table S1. In these metal complexes, methoxy was used as a model ligand for the alkoxide; the number of methoxy groups coordinated to the active metal centre was adjusted to achieve a neutral complex for the Fe(II) case, and both neutral and cationic complexes, assumed to correspond to Fe(II) and Fe(III) backbone oxidation states, were fully optimised. For DFT calculations in Jaguar, initial formal charges can be set, but there is ultimately no control over which metal centre is oxidised; Fe-C distances and NBO charges on Fe suggest that for all compounds reported here, the iron centre has been oxidised, but, as noted below, Ce complexes were ultimately left out as these proved more difficult to control. In all schemes and tables, M = Al(OMe), Sc(OMe), Ti(OMe)<sub>2</sub>, Y(OMe), Zr(OMe)<sub>2</sub>, In(OMe), Hf(OMe)<sub>2</sub>.

We also attempted an evaluation of Zr<sup>3+</sup> and Ce<sup>3+</sup> or Ce<sup>4+</sup> complexes, but these calculations proved persistently difficult to converge and unreliable with respect to determining whether the oxidation occurred on the ferrocene or the reacting metal. This also occurred for some of the other complexes, most notably with L2, limiting the variation captured in the database in this case. This ties in with mechanistic study of the cerium catalysis,<sup>6</sup> where the oxidation process was found to change the oxidation state of the reacting metal (confirmed by XANES and Mössbauer spectroscopy), rather than the metallocene backbone and will be investigated further in a future study.

DFT calculations can be unreliable in cases where multiple electronic configurations can be accessed energetically, and we are exploring whether wavefunction stability checks, available e.g. in Gaussian, would help to improve data robustness and convergence. However, the computational approach was chosen to capture spin state energy differences well. While dispersion and solvation effects are likely to affect geometries and energies, this matters less for a systematic evaluation of metal complexes as all will be affected by similar errors, with trends being captured more reliably.

Our selection of metal complexes to consider was driven by curiosity and pragmatism, with the most extensive structural variations explored for Y complexes as these generally converged well in both oxidation states. We have not sought to achieve a full exploration of all structural variations for all metal centres, but instead focussed on different subsets to map out the importance of variable effects, as discussed in the text. For some of the metal centres considered, we only managed to optimise one of the oxidation states, despite repeated attempts; these have not been included in the present analysis, making the sampling of the different ligands and metal centres uneven.

#### Descriptors:

Initially, a large number of structural parameters and NBO charges, as well as the energy differences between the Fe(II) and Fe(III) oxidation states, were extracted from each successful geometry optimisation. Some structural parameters did not respond strongly to the variations explored here, and were not included in our final analysis, e.g., the O-C distances in the methoxy groups. For the Fe-C distances and charges, we found the net change on oxidation more useful than the raw data, whereas for most of the descriptors further removed from the Fe centres, the variation with the Fe oxidation state was small and showed no clear trend, leading us to focus on the descriptors as measured directly. We have used averages of distances and angles to avoid complications around extracting data consistently across varied chemistries and coordination geometries. This may mask outlier responses, but is computationally more convenient. It is worth noting that we perform PCA on the correlation matrix, so all descriptors are standardised and means-centered in this process.

We initially considered treating each oxidation state as a separate entry in the database, but found that the distribution of metal complexes in the Fe(II) and Fe(III) version tended to shadow rather closely (Figure S1), making the data analysis difficult. In addition, the present version captures

differences between catalysts, rather than those due to changing the oxidation state. To achieve detailed insight in differences in catalytic behaviour when changing the oxidation state, additional mechanistic study is necessary and we envisage introducing reaction-specific descriptors to improve resolution in due course.

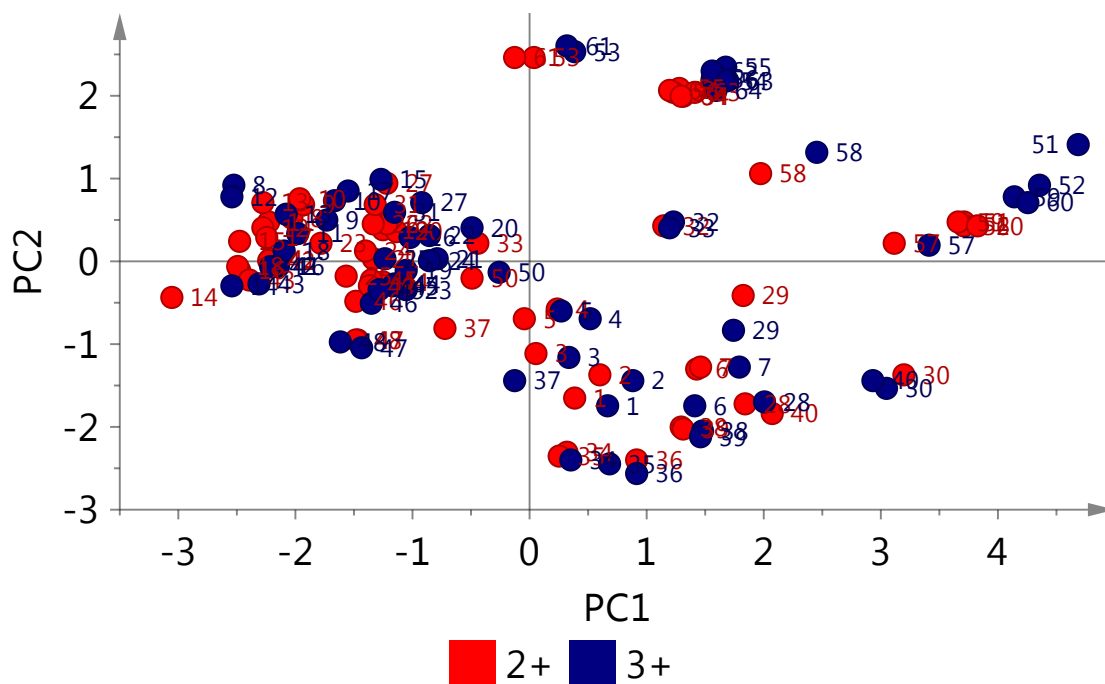

Figure S1: PC1 and PC2 score plot treating each oxidation state as a separate entry.



**Table S3:** Descriptor labels, details, and standard descriptive statistics.

| <b>Descriptor</b>              | <b>Details (unit)</b>                                                                            | <b>Mean</b>      | <b>STD</b>     | <b>Min.</b>      | <b>Max.</b>      |
|--------------------------------|--------------------------------------------------------------------------------------------------|------------------|----------------|------------------|------------------|
| M-D1(Fe2),<br>M-D1(Fe3)        | r(M-D1), both oxidation states (Å)                                                               | 2.546<br>2.713   | 0.388<br>0.517 | 2.016<br>2.070   | 3.854<br>4.177   |
| M-D2(Fe2),<br>M-D2(Fe3)        | r(M-D2), both oxidation states (Å)                                                               | 2.050<br>2.024   | 0.130<br>0.127 | 1.753<br>1.748   | 2.224<br>2.192   |
| M-OMe(Fe2),<br>M-OMe(Fe3)      | r(M-OMe), both oxidation states (Å)                                                              | 1.928<br>1.916   | 0.109<br>0.119 | 1.704<br>1.677   | 2.082<br>2.204   |
| D1-R(Fe2),<br>D1-R(Fe3)        | av. r(D1-R), both oxidation states (Å)                                                           | 1.512<br>1.504   | 0.169<br>0.169 | 1.273<br>1.259   | 1.806<br>1.800   |
| D2-R(Fe2),<br>D2-R(Fe3)        | r(D2-R), both oxidation states (Å)                                                               | 1.318<br>1.323   | 0.015<br>0.015 | 1.292<br>1.289   | 1.357<br>1.353   |
| ∠R-D1-R(Fe2), ∠R-<br>D1-R(Fe3) | av. ∠R-D1-R, both oxidation states (°)                                                           | 113.8<br>114.4   | 5.6<br>6.3     | 104.9<br>101.7   | 129.8<br>128.7   |
| Q(M)(Fe2),<br>Q(M)(Fe3)        | NBO charge on M, both oxidation states                                                           | 2.018<br>2.047   | 0.255<br>0.229 | 1.393<br>1.528   | 2.412<br>2.402   |
| Q(OMe)(Fe2),<br>Q(OMe)(Fe3)    | NBO charge on OMe group, both<br>oxidation states                                                | -0.604<br>-0.589 | 0.127<br>0.131 | -0.757<br>-0.748 | -0.357<br>-0.334 |
| ΔFe-C                          | change in av. Fe-C distances due to<br>oxidation state, av. r(Fe-C,Fe3) – av.<br>r(Fe-C,Fe2) (Å) | 0.053            | 0.006          | 0.039            | 0.068            |
| ΔQ(Fe)                         | change in NBO charge on Fe centre,<br>Q(Fe3) – Q(Fe2)                                            | 0.493            | 0.017          | 0.454            | 0.525            |
| ΔE                             | E <sub>opt</sub> (Fe3 complex) – E <sub>opt</sub> (Fe2 complex)<br>(kcal mol <sup>-1</sup> )     | 132.35           | 9.24           | 115.03           | 150.98           |

Most of the structural descriptors are highly correlated between the two oxidation states, giving rise to correlation coefficients >0.8. These include M-D1, M-D2, M-OMe, D1-R, D2-R, <R-D1-R, Q(OMe).

Table S4 lists additional correlations >0.6.

**Table S4:** Correlations >0.6 (not including the same descriptor in different oxidation states, as noted above).

| Descriptor 1 | Descriptor 2 | Correlation |
|--------------|--------------|-------------|
| M-D1(Fe2)    | D2-R(Fe2)    | 0.732       |
| M-D2(Fe2)    | M-OMe(Fe2)   | 0.940       |
|              | M-OMe(Fe3)   | 0.941       |
| M-OMe(Fe2)   | Q(M) (Fe2)   | 0.607       |
|              | Q(M) (Fe3)   | 0.612       |
|              | M-OMe(Fe3)   | 0.947       |
| D1-R(Fe2)    | <RDR(Fe2)    | -0.655      |
|              | <RDR(Fe3)    | -0.691      |
| D2-R(Fe2)    | M-D1(Fe3)    | 0.724       |
| <RDR(Fe2)    | D1-R(Fe3)    | -0.628      |
| Q(M)(Fe2)    | Q(OMe)(Fe2)  | -0.606      |
|              | M-OMe(Fe2)   | 0.617       |
| M-D1(Fe3)    | D2-R(Fe2)    | 0.623       |
| M-D2(Fe3)    | M-OMe(Fe3)   | 0.946       |
| M-OMe(Fe3)   | Q(M) (Fe3)   | 0.617       |
| D1-R(Fe3)    | <RDR(Fe3)    | -0.674      |

Correlations between structural descriptors and the three descriptors capturing the change experienced after oxidation change ( $\Delta E$ ,  $\Delta Q(\text{Fe})$  and  $\Delta \text{Fe-C}$ ) are not as high, but  $\Delta Q(\text{Fe})$  has a correlation coefficient of -0.531 with <RDR(Fe3) (-0.460 with <RDR(Fe)), while  $\Delta \text{Fe-C}$  has a number of correlation coefficients >0.5 (M-D1(Fe2) = 0.519, M-D2(Fe2) = -0.514, D2-R(Fe2) = 0.555, <RDR(Fe2) = -0.583, M-D1(Fe2) = 0.500, <RDR(Fe3) = 0.500. No variable correlates particularly highly with the vertical ionisation energy,  $\Delta E$ , and it does not load highly on the first two PCs (see below), suggesting perhaps that its relationship with the remainder of this database is not described well by a linear regression equation.

PCA results

Table S5: Autofit diagnostics:

| Component | R <sup>2</sup> X | R <sup>2</sup> X(cum) | Eigenvalue | Q <sup>2</sup> | Limit Q <sup>2</sup> (cum) |       |
|-----------|------------------|-----------------------|------------|----------------|----------------------------|-------|
| 0         | Cent.            |                       |            |                |                            |       |
| 1         | 0.399            | 0.399                 | 7.58       | 0.288          | 0.065                      | 0.288 |
| 2         | 0.165            | 0.563                 | 3.13       | 0.079          | 0.068                      | 0.344 |
| 3         | 0.144            | 0.707                 | 2.74       | 0.160          | 0.071                      | 0.449 |
| 4         | 0.101            | 0.808                 | 1.92       | 0.099          | 0.074                      | 0.504 |
| 5         | 0.072            | 0.880                 | 1.37       | 0.255          | 0.078                      | 0.630 |
| 6         | 0.036            | 0.916                 | 0.682      | 0.165          | 0.083                      | 0.691 |
| 7         | 0.024            | 0.941                 | 0.461      | -0.005         | 0.087                      | 0.690 |
| 8         | 0.021            | 0.961                 | 0.396      | 0.100          | 0.093                      | 0.721 |
| 9         | 0.014            | 0.975                 | 0.257      | -0.050         | 0.100                      | 0.707 |

## Descriptor loadings

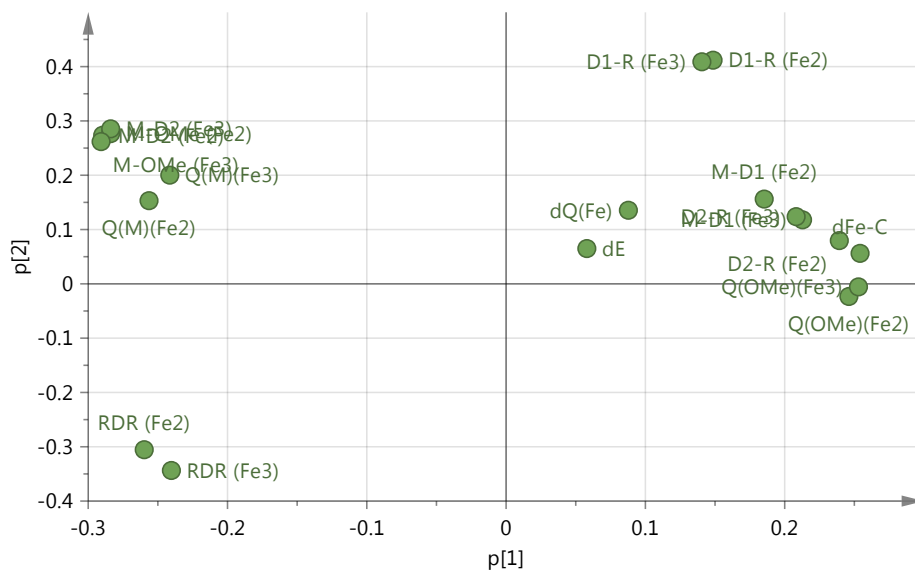

Figure S2: Descriptor loadings plot, PC1 and PC2.

Table S6: Descriptor loadings, PC1-4.

| Var ID<br>(Primary)                  | M1.p[1]     | M1.p[2]     | M1.p[3]     | M1.p[4]     |
|--------------------------------------|-------------|-------------|-------------|-------------|
| <b>Cumulative %<br/>of variation</b> | <b>39.9</b> | <b>56.3</b> | <b>70.7</b> | <b>80.8</b> |
| M-D1 (Fe2)                           | 0.185       | 0.157       | -0.399      | 0.008       |
| M-D2 (Fe2)                           | -0.289      | 0.274       | 0.010       | -0.162      |
| M-OMe (Fe2)                          | -0.283      | 0.276       | -0.095      | -0.104      |
| D1-R (Fe2)                           | 0.148       | 0.413       | 0.165       | -0.162      |
| D2-R (Fe2)                           | 0.239       | 0.079       | -0.387      | 0.090       |
| RDR (Fe2)                            | -0.259      | -0.305      | -0.134      | -0.132      |
| Q(M)(Fe2)                            | -0.257      | 0.153       | -0.184      | 0.278       |
| Q(OMe)(Fe2)                          | 0.246       | -0.022      | 0.064       | -0.352      |
| M-D1 (Fe3)                           | 0.212       | 0.119       | -0.396      | 0.003       |
| M-D2 (Fe3)                           | -0.284      | 0.287       | 0.003       | -0.143      |
| M-OMe (Fe3)                          | -0.291      | 0.261       | -0.106      | -0.114      |
| D1-R (Fe3)                           | 0.140       | 0.409       | 0.173       | -0.173      |
| D2-R (Fe3)                           | 0.208       | 0.124       | -0.350      | -0.009      |
| RDR (Fe3)                            | -0.240      | -0.344      | -0.164      | -0.119      |
| Q(M)(Fe3)                            | -0.241      | 0.200       | -0.183      | 0.271       |
| Q(OMe)(Fe3)                          | 0.253       | -0.005      | 0.043       | -0.343      |
| $\Delta E$                           | 0.058       | 0.064       | 0.138       | 0.543       |
| $\Delta Q(Fe)$                       | 0.088       | 0.135       | 0.438       | 0.269       |
| $\Delta Fe-C$                        | 0.254       | 0.056       | -0.070      | 0.272       |

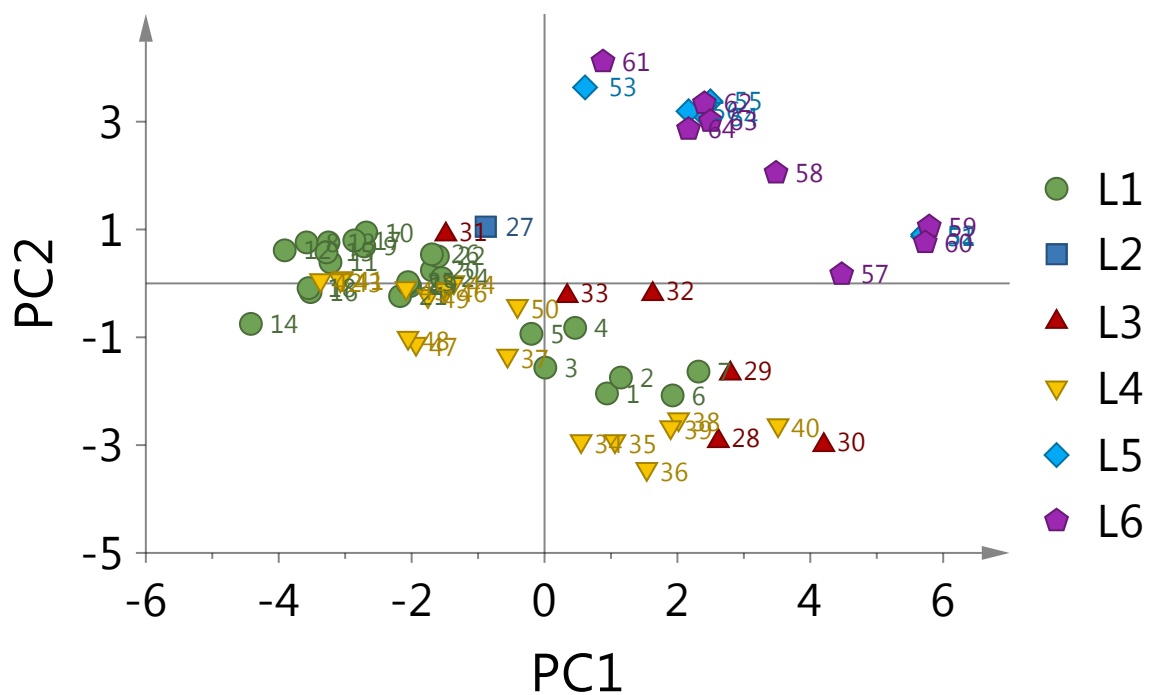

Figure S3: PC1 and PC2 score plot, short labels, coloured by L (Table S1).

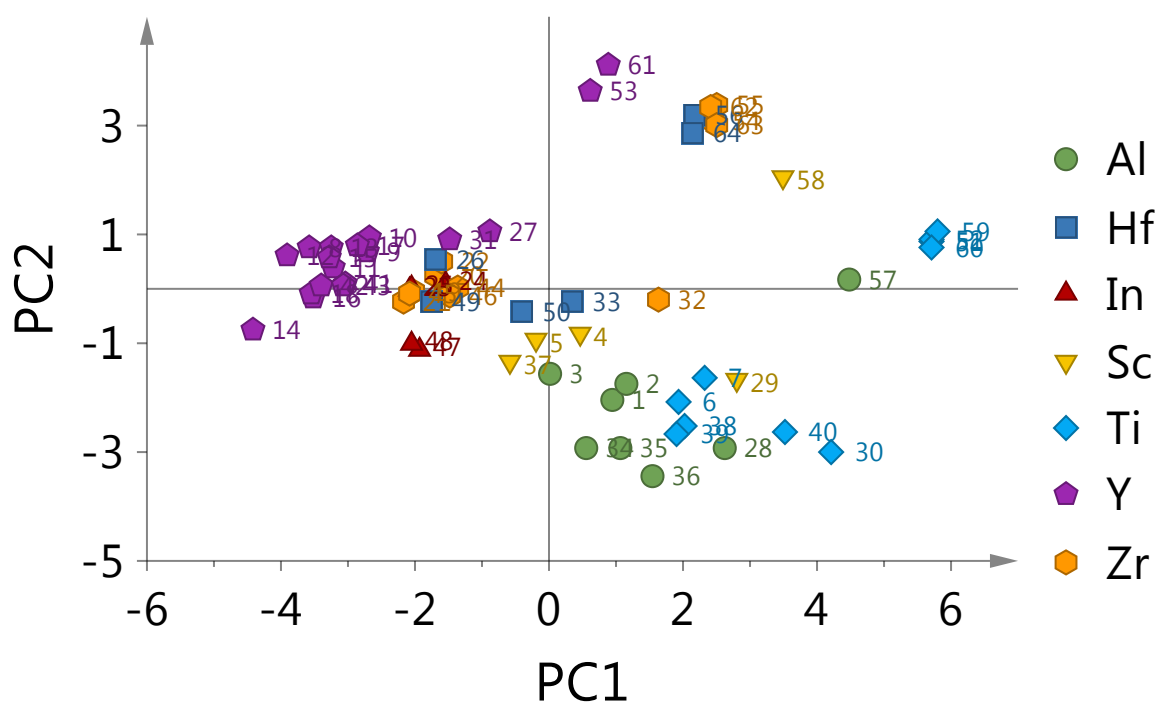

Figure S4: PC1 and PC2 score plot, short labels, coloured by M (Table S1).



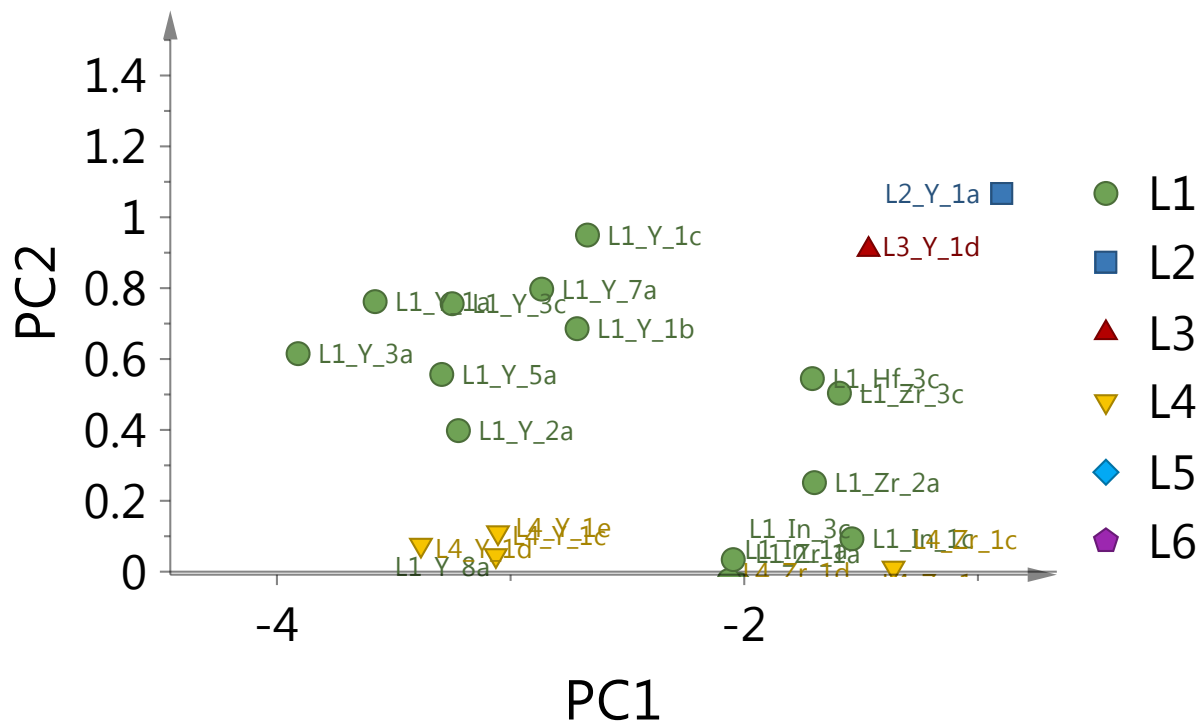

Figure S7: PC1 and PC2 score plot, upper left quadrant, full labels, coloured by L (Table S1).

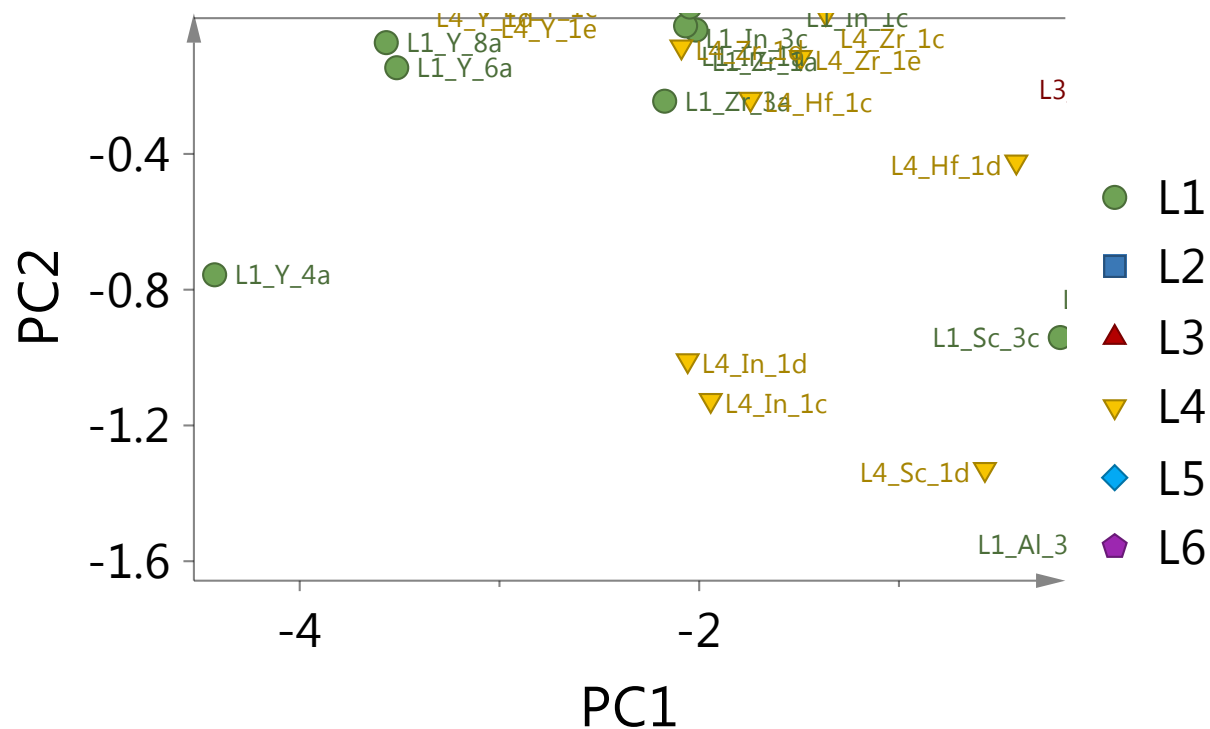

Figure S8: PC1 and PC2 score plot, lower left quadrant, full labels, coloured by L (Table S1).

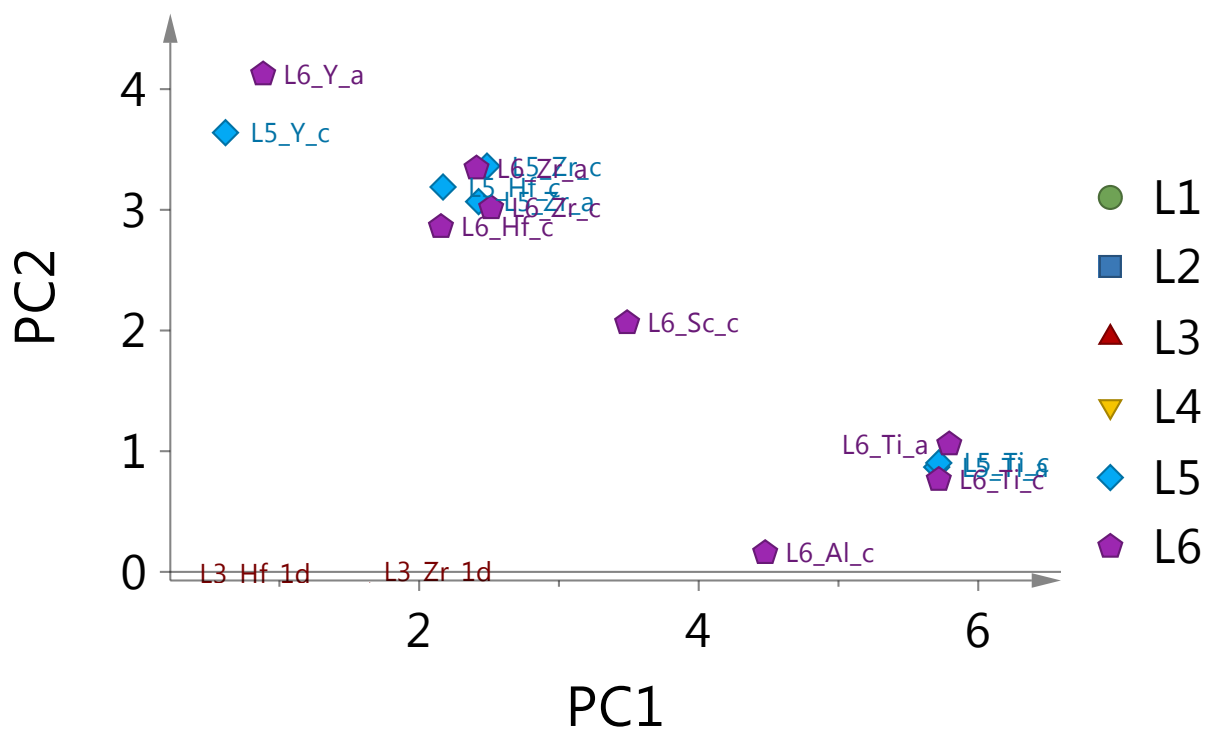

Figure S9: PC1 and PC2 score plot, upper right quadrant, full labels, coloured by L (Table S1).

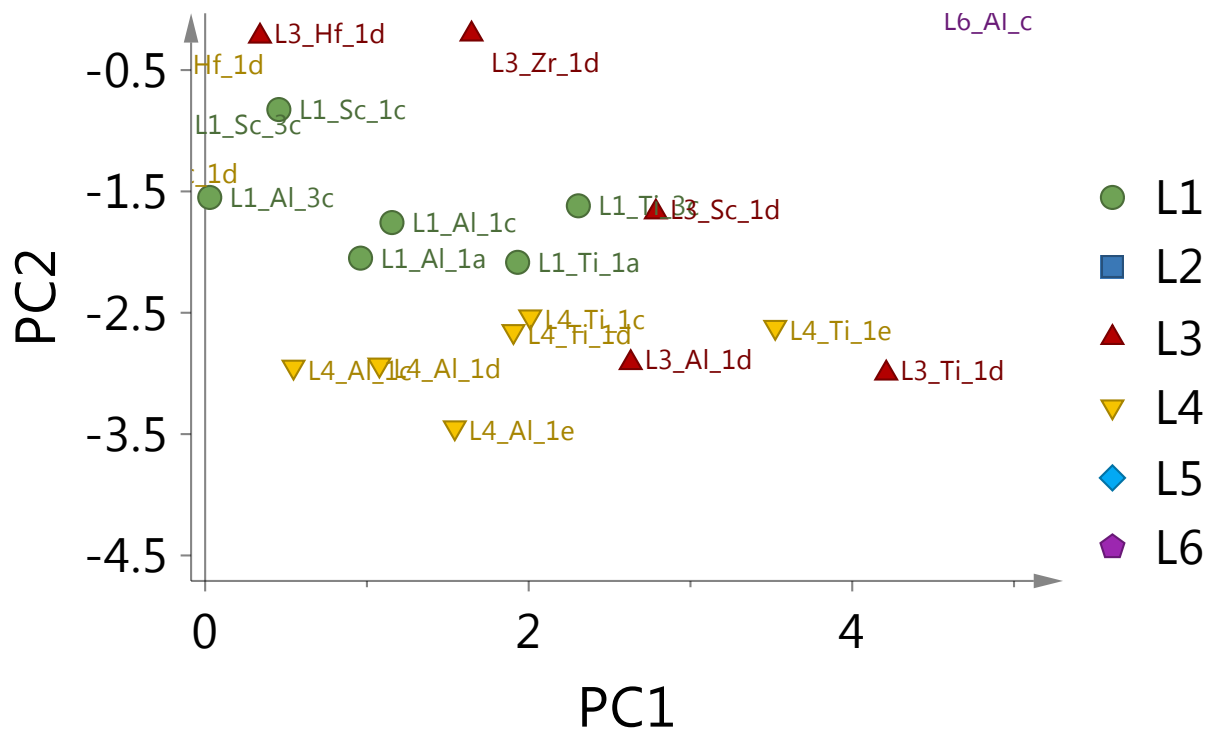

Figure S10: PC1 and PC2 score plot, lower right quadrant, full labels, coloured by L (Table S1).



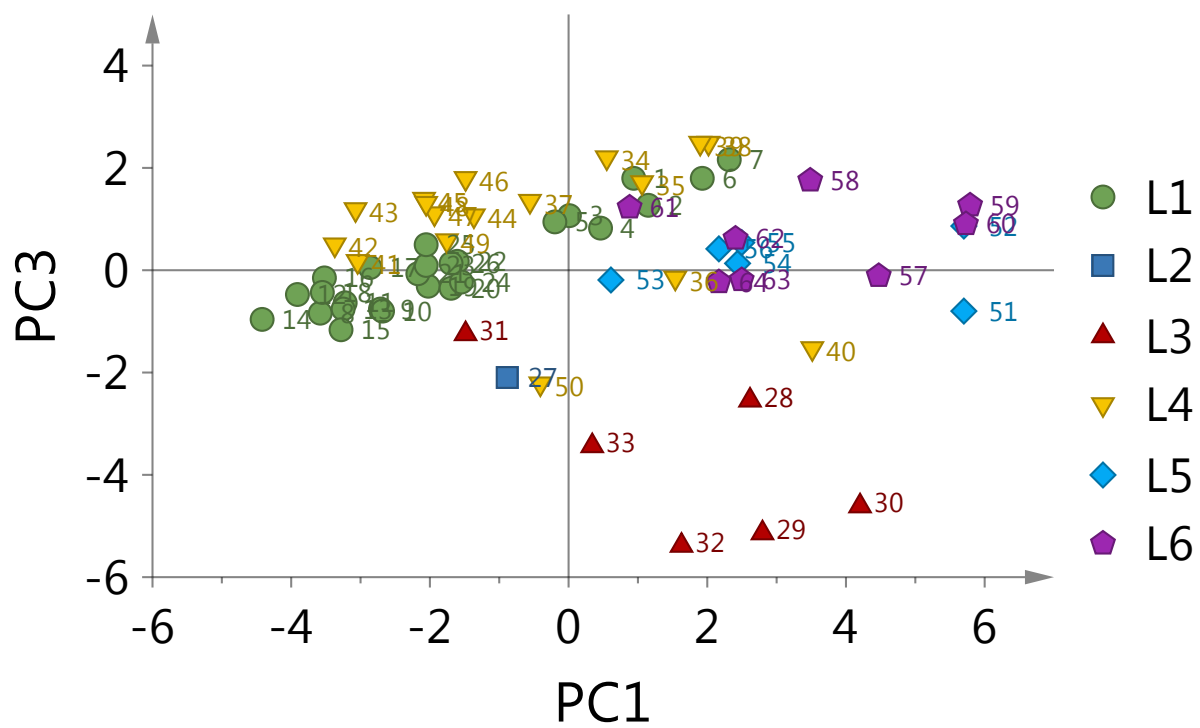

Figure S11: PC1 and PC3 score plot, short labels, coloured by L (Table S1).

## References

1. Jaguar, version 8.5, L. Schrödinger, Schrödinger, LLC, 2014, New York, NY.
2. a) J. C. Slater, *Quantum Theory of Molecules and Solids, Vol. 4: The Self-Consistent Field for Molecules and Solids*, McGraw-Hill, New York, 1974; b) J. P. Perdew, P. Ziesche and H. Eschrig, eds., in *Electronic Structure Theory of Solids*, Akademie Verlag, Berlin, 1991; c) J. P. Perdew, J. A. Chevary, S. H. Vosko, K. A. Jackson, M. R. Pederson, D. J. Singh and C. Fiolhais, *Phys. Rev. B*, 1992, **46**, 6671; d) A. D. Becke, *Phys. Rev. A*, 1998, **38**, 3098.
3. NBO 5.0 E. D. Glendening, J. K. Badenhoop, A. E. Reed, J. E. Carpenter, J. A. Bohmann, C. M. Morales and F. Weinhold, 2001, Madison.
4. SIMCA, version 15, 2018, Sartorius Stedim Data Analytics AB.
5. R. Dai, A. Lai, A. N. Alexandrova and P. L. Diaconescu, *Organometallics*, 2018, **37**, 4040-4047.
6. E. M. Broderick, N. Guo, T. Wu, C. S. Vogel, C. Xu, J. Sutter, J. T. Miller, K. Meyer, T. Cantat and P. L. Diaconescu, *Chem. Commun.*, 2011, **47**, 9897-9899.

XYZ coordinates for representative compounds (related compounds in each set were built by altering metal atoms, substituents and oxidation states; all data extracted have been provided as a separate Excel file)

L1\_Y\_3c

Fe(II)

|     |               |               |               |
|-----|---------------|---------------|---------------|
| Y1  | 1.9882602479  | 3.4918309115  | 3.5408533153  |
| Fe2 | -0.2156613170 | 4.7087339686  | 6.6626906496  |
| P3  | -1.2740520670 | 3.3531795296  | 2.4148691890  |
| P4  | 3.2369008348  | 1.6936097167  | 6.3713245211  |
| N5  | -0.3912427928 | 3.7596513792  | 3.7212175211  |
| N6  | 2.0393300917  | 2.6552536270  | 5.8192172263  |
| O7  | 1.3904380822  | 3.6960094679  | 1.4127982786  |
| O8  | 3.3824664560  | 1.8234212011  | 3.3674216122  |
| O9  | 2.9433464191  | 5.2764152767  | 3.9266571504  |
| C10 | -0.9011070543 | 4.6086101777  | 4.7205015194  |
| C11 | -0.4228323898 | 5.9275213027  | 5.0206423129  |
| H12 | 0.3975770693  | 6.4172835475  | 4.5120324458  |
| C13 | -1.1698165909 | 6.4352893864  | 6.1223499228  |
| H14 | -1.0229843089 | 7.3947441682  | 6.6022433685  |
| C15 | -2.1147742645 | 5.4400300158  | 6.5121915273  |
| H16 | -2.8077014882 | 5.5110204442  | 7.3412068094  |
| C17 | -1.9420543006 | 4.3098790019  | 5.6616530609  |
| H18 | -2.4814887818 | 3.3735558437  | 5.7174248224  |
| C19 | 1.3954226520  | 3.4210132756  | 6.8284254834  |
| C20 | 1.7458997841  | 4.7450725569  | 7.2621079053  |
| H21 | 2.5038497357  | 5.3659099394  | 6.8052381268  |
| C22 | 0.8865794384  | 5.1108512362  | 8.3365356141  |
| H23 | 0.8818746304  | 6.0643553413  | 8.8497688980  |
| C24 | -0.0105259822 | 4.0270252969  | 8.5730607578  |
| H25 | -0.8124093379 | 4.0122213542  | 9.3005739023  |
| C26 | 0.2945008414  | 2.9927060575  | 7.6423886602  |
| H27 | -0.2200584201 | 2.0465555739  | 7.5421998474  |
| C28 | -0.8555705027 | 4.1910666144  | 0.8818204934  |
| C29 | -1.8294031526 | 4.7261544048  | 0.0295708384  |
| H30 | -2.8778669696 | 4.6262678162  | 0.2975054317  |
| C31 | -1.4706779796 | 5.3737045217  | -1.1482780560 |
| C32 | -0.0966051831 | 5.4588043801  | -1.4222168632 |
| H33 | 0.2037069539  | 5.9680282454  | -2.3296893960 |
| C34 | 0.5363855546  | 4.2572129371  | 0.5859246351  |
| C35 | 3.6919556679  | 0.3807908943  | 5.2293387020  |
| C36 | 4.1377640292  | -0.8387216613 | 5.7614921221  |
| H37 | 4.0777419049  | -1.0001362586 | 6.8341756116  |
| C38 | 4.6554948036  | -1.8411689833 | 4.9498951873  |
| C39 | 4.7322236661  | -1.5546033852 | 3.5788127936  |
| H40 | 5.1385439797  | -2.3174573196 | 2.9263361474  |
| C41 | 3.7806246279  | 0.6630296424  | 3.8361077300  |
| C42 | 3.5209916023  | 6.5293554642  | 3.8022193954  |
| H43 | 2.8011301314  | 7.2828492728  | 3.4399545049  |
| H44 | 3.9063156869  | 6.8943047283  | 4.7711513079  |
| H45 | 4.3677829695  | 6.5250911832  | 3.0964294376  |

|     |               |               |               |
|-----|---------------|---------------|---------------|
| C46 | 4.3296494747  | -0.3543620684 | 2.9935626775  |
| C47 | 0.9164600628  | 4.9380826899  | -0.6144845975 |
| C48 | 2.3938185618  | 5.0991053395  | -1.0087474670 |
| C49 | -2.5481443050 | 5.9572920981  | -2.0746238704 |
| C50 | 4.4924418673  | -0.1210603516 | 1.4822989953  |
| C51 | 5.1118302326  | -3.1769079647 | 5.5566271029  |
| C52 | 6.2097404463  | -2.9231614604 | 6.6090611586  |
| H53 | 5.8528846137  | -2.2838665273 | 7.4248988044  |
| H54 | 6.5449773519  | -3.8695055245 | 7.0537979738  |
| H55 | 7.0797279119  | -2.4326746984 | 6.1564727156  |
| C56 | 3.9127080625  | -3.8705098169 | 6.2319576270  |
| H57 | 3.4864793665  | -3.2512227687 | 7.0290259349  |
| H58 | 3.1179351964  | -4.0730535590 | 5.5038405536  |
| H59 | 4.2170210428  | -4.8265533509 | 6.6782041855  |
| C60 | 5.6826871590  | -4.1334669446 | 4.4988507875  |
| H61 | 5.9807537400  | -5.0753909605 | 4.9752774886  |
| H62 | 4.9451540423  | -4.3744096640 | 3.7238324499  |
| H63 | 6.5702681306  | -3.7168513883 | 4.0081068298  |
| C64 | 5.1226690640  | -1.3272142778 | 0.7674793285  |
| H65 | 4.5044859941  | -2.2300657927 | 0.8496901939  |
| H66 | 5.2247401929  | -1.0981642734 | -0.3001120151 |
| H67 | 6.1244184527  | -1.5587529485 | 1.1501384159  |
| C68 | 3.1145796976  | 0.1264571532  | 0.8374752362  |
| H69 | 2.4570838230  | -0.7394168080 | 0.9834857594  |
| H70 | 2.6227118218  | 1.0044644804  | 1.2595384448  |
| H71 | 3.2261253161  | 0.2870688745  | -0.2427212628 |
| C72 | 5.4175829880  | 1.0891337480  | 1.2418364971  |
| H73 | 5.5210296155  | 1.2777449146  | 0.1654416223  |
| H74 | 5.0205896324  | 1.9890752241  | 1.7149270162  |
| H75 | 6.4182297029  | 0.8979138936  | 1.6497432844  |
| C76 | 3.0499987773  | 3.7124284591  | -1.1537493542 |
| H77 | 2.9762384376  | 3.1418408610  | -0.2262621112 |
| H78 | 2.5649005925  | 3.1365694099  | -1.9520883333 |
| H79 | 4.1114149292  | 3.8221362752  | -1.4129831153 |
| C80 | 3.1288577959  | 5.9191801251  | 0.0689059236  |
| H81 | 3.0501134985  | 5.4487575296  | 1.0504917658  |
| H82 | 4.1932537098  | 6.0129698895  | -0.1848838700 |
| H83 | 2.7083999008  | 6.9302491762  | 0.1396977937  |
| C84 | 2.5692255794  | 5.8368602290  | -2.3465493432 |
| H85 | 3.6392637468  | 5.9221269385  | -2.5719306166 |
| H86 | 2.1007671674  | 5.3011132850  | -3.1815231694 |
| H87 | 2.1599392191  | 6.8544990273  | -2.3165666221 |
| C88 | -3.3742179278 | 7.0085845119  | -1.3063000648 |
| H89 | -3.8722661379 | 6.5745396725  | -0.4317588373 |
| H90 | -2.7341576587 | 7.8265044641  | -0.9543613639 |
| H91 | -4.1514661152 | 7.4383892582  | -1.9520713069 |
| C92 | -3.4833300951 | 4.8290903353  | -2.5562421431 |
| H93 | -3.9809148402 | 4.3275116443  | -1.7182277425 |
| H94 | -4.2655199661 | 5.2280424202  | -3.2157240033 |
| H95 | -2.9234758485 | 4.0694230747  | -3.1150781780 |
| C96 | -1.9480962682 | 6.6378496473  | -3.3142311461 |

|      |                |               |               |
|------|----------------|---------------|---------------|
| H97  | -2.7530380603  | 7.0397372713  | -3.9415139427 |
| H98  | -1.2911665101  | 7.4733711443  | -3.0445643896 |
| H99  | -1.3722655735  | 5.9343645386  | -3.9276931652 |
| X100 | -1.2116000000# | 4.9630670000# | 5.7891090000# |
| X101 | 0.3323850000#  | 3.5837900000# | 7.4084670000# |
| C102 | 1.7591977730   | -0.2152388451 | 10.3241069510 |
| C103 | 1.3792634381   | -0.7482624045 | 9.0912860438  |
| C104 | 1.8614144988   | -0.1916967423 | 7.9097965658  |
| C105 | 2.7460005103   | 0.8979939291  | 7.9432030707  |
| C106 | 3.1083376243   | 1.4360683157  | 9.1829844812  |
| C107 | 2.6196814379   | 0.8793456318  | 10.3649791964 |
| H108 | 1.3817115656   | -0.6489824317 | 11.2469080703 |
| H109 | 0.7034922844   | -1.5993036136 | 9.0495155749  |
| H110 | 1.5578293688   | -0.6111603596 | 6.9538655144  |
| H111 | 3.7696101826   | 2.2965734764  | 9.2301360715  |
| H112 | 2.9110812081   | 1.3093671059  | 11.3202291293 |
| C113 | 7.2131238984   | 3.9359825313  | 7.1726610242  |
| C114 | 7.0251168347   | 2.6506407472  | 7.6846850547  |
| C115 | 5.8255873411   | 1.9799867406  | 7.4659910465  |
| C116 | 4.7912943982   | 2.5927083170  | 6.7420769861  |
| C117 | 4.9892705419   | 3.8737956684  | 6.2166166083  |
| C118 | 6.1972066363   | 4.5385040591  | 6.4347789420  |
| H119 | 8.1508798365   | 4.4594555930  | 7.3435821532  |
| H120 | 7.8164230321   | 2.1676335221  | 8.2533616791  |
| H121 | 5.6972490280   | 0.9743816155  | 7.8601536212  |
| H122 | 4.2128473078   | 4.3485779634  | 5.6184776147  |
| H123 | 6.3402673556   | 5.5335785589  | 6.0203368253  |
| C124 | -5.7706225297  | 4.1055736092  | 3.1538329899  |
| C125 | -4.8764711925  | 5.1732150854  | 3.0749230475  |
| C126 | -3.5259397925  | 4.9367408267  | 2.8394475692  |
| C127 | -3.0556579961  | 3.6241689003  | 2.6769795165  |
| C128 | -3.9580600403  | 2.5577579351  | 2.7613696522  |
| C129 | -5.3107621495  | 2.8004668615  | 2.9974048706  |
| H130 | -6.8260142463  | 4.2924484452  | 3.3383131913  |
| H131 | -5.2301792481  | 6.1932868905  | 3.2021595741  |
| H132 | -2.8350078264  | 5.7737656185  | 2.7842292969  |
| H133 | -3.6079045940  | 1.5367338640  | 2.6392374681  |
| H134 | -6.0049628016  | 1.9656703336  | 3.0583558361  |
| C135 | -0.9456561224  | -1.2016137593 | 1.8416956807  |
| C136 | -1.2462460264  | -0.3868702890 | 0.7494699397  |
| C137 | -1.3063506733  | 0.9950641416  | 0.9046037990  |
| C138 | -1.0715455965  | 1.5672251925  | 2.1606636030  |
| C139 | -0.7644311886  | 0.7486854549  | 3.2539133546  |
| C140 | -0.6984886407  | -0.6339437852 | 3.0900472512  |
| H141 | -0.8953050026  | -2.2807797907 | 1.7163210459  |
| H142 | -1.4270841242  | -0.8291776330 | -0.2271642906 |
| H143 | -1.5265966438  | 1.6333994329  | 0.0522144865  |
| H144 | -0.5761619414  | 1.2025742092  | 4.2246022382  |
| H145 | -0.4486350668  | -1.2671829261 | 3.9377194728  |

Fe(III)

|     |               |               |               |
|-----|---------------|---------------|---------------|
| Y1  | 2.0480496858  | 3.6090874947  | 3.5711198243  |
| Fe2 | -0.3297859462 | 4.7299435081  | 6.7629696963  |
| P3  | -1.2395601228 | 3.4099220084  | 2.4374539710  |
| P4  | 3.2155433458  | 1.6610280099  | 6.3417467220  |
| N5  | -0.3706666383 | 4.0330165342  | 3.6975334024  |
| N6  | 1.9813714279  | 2.6644336500  | 5.8936526119  |
| O7  | 1.4528628139  | 3.8250883592  | 1.4955666464  |
| O8  | 3.4337177896  | 1.9615186356  | 3.4581404945  |
| O9  | 2.8491845865  | 5.4213080742  | 4.1382408407  |
| C10 | -0.9015884259 | 4.8495862811  | 4.6578211250  |
| C11 | -0.2623263250 | 6.0413794099  | 5.1520435760  |
| H12 | 0.6669706479  | 6.4340066903  | 4.7580641823  |
| C13 | -1.0364585387 | 6.5704291720  | 6.2266200558  |
| H14 | -0.8245163382 | 7.4802980242  | 6.7732276399  |
| C15 | -2.1293192307 | 5.6833109923  | 6.4568369269  |
| H16 | -2.8916832133 | 5.7911870519  | 7.2178680211  |
| C17 | -2.0239127262 | 4.6092152804  | 5.5286419823  |
| H18 | -2.6765004417 | 3.7480794506  | 5.4797875199  |
| C19 | 1.3164412123  | 3.2954549382  | 6.9416989064  |
| C20 | 1.6300966484  | 4.5636315386  | 7.5363923353  |
| H21 | 2.4428941580  | 5.2043235275  | 7.2231970437  |
| C22 | 0.6846830563  | 4.8467687104  | 8.5611656655  |
| H23 | 0.6786141746  | 5.7258585723  | 9.1929052066  |
| C24 | -0.2681309666 | 3.7857868947  | 8.5820850233  |
| H25 | -1.1182271021 | 3.7020426711  | 9.2469390757  |
| C26 | 0.1032237155  | 2.8508449669  | 7.5687367088  |
| H27 | -0.4207279654 | 1.9387290546  | 7.3167383150  |
| C28 | -0.8003589226 | 4.1408316893  | 0.8685423030  |
| C29 | -1.7777717133 | 4.5255543584  | -0.0628696321 |
| H30 | -2.8267376890 | 4.3612779248  | 0.1664684240  |
| C31 | -1.4131837006 | 5.1031273838  | -1.2731300687 |
| C32 | -0.0388018642 | 5.3045088179  | -1.4861736302 |
| H33 | 0.2594407835  | 5.7783342228  | -2.4127350329 |
| C34 | 0.5908864267  | 4.2921117703  | 0.6155600619  |
| C35 | 3.5468062220  | 0.3456369559  | 5.1742534726  |
| C36 | 3.8622341720  | -0.9408128255 | 5.6358991200  |
| H37 | 3.7451904469  | -1.1736447087 | 6.6902940435  |
| C38 | 4.3431821519  | -1.9110785120 | 4.7634722551  |
| C39 | 4.5083818856  | -1.5247618237 | 3.4245859179  |
| H40 | 4.8960165491  | -2.2631656593 | 2.7341649912  |
| C41 | 3.7214297433  | 0.7232630767  | 3.8168622090  |
| C42 | 3.5602730404  | 6.6138450323  | 4.0195383445  |
| H43 | 2.9476744340  | 7.4088756757  | 3.5649150848  |
| H44 | 3.8925944950  | 6.9808645184  | 5.0054280512  |
| H45 | 4.4577567984  | 6.4959778246  | 3.3935920230  |
| C46 | 4.2287243886  | -0.2556562057 | 2.9146779600  |
| C47 | 0.9745962009  | 4.9364576023  | -0.5995113016 |
| C48 | 2.4506338421  | 5.2257951273  | -0.9227901556 |
| C49 | -2.4871841047 | 5.4970317528  | -2.2995446454 |
| C50 | 4.4805419990  | 0.0727794314  | 1.4341603770  |
| C51 | 4.7023850052  | -3.3123852776 | 5.2818488045  |

|      |                |               |               |
|------|----------------|---------------|---------------|
| C52  | 5.8074054790   | -3.1909177660 | 6.3511097735  |
| H53  | 5.4819272779   | -2.5891662674 | 7.2079460720  |
| H54  | 6.0881878803   | -4.1811880034 | 6.7313915021  |
| H55  | 6.7062215179   | -2.7219724625 | 5.9334056680  |
| C56  | 3.4560523842   | -3.9693338081 | 5.9065483485  |
| H57  | 3.0616408593   | -3.3825853389 | 6.7445141882  |
| H58  | 2.6557680708   | -4.0772036284 | 5.1644186914  |
| H59  | 3.6991475816   | -4.9685456269 | 6.2889414068  |
| C60  | 5.2189970704   | -4.2308323277 | 4.1656364711  |
| H61  | 5.4544481252   | -5.2176521016 | 4.5807087556  |
| H62  | 4.4727953690   | -4.3746100285 | 3.3751764313  |
| H63  | 6.1357315520   | -3.8428097153 | 3.7061914499  |
| C64  | 5.0887588654   | -1.1132183889 | 0.6674172815  |
| H65  | 4.4220634774   | -1.9843113723 | 0.6463840341  |
| H66  | 5.2645205263   | -0.8140628179 | -0.3724005304 |
| H67  | 6.0541208392   | -1.4266666463 | 1.0834015889  |
| C68  | 3.1460850452   | 0.4259778909  | 0.7493623634  |
| H69  | 2.4510638423   | -0.4211907686 | 0.7988795230  |
| H70  | 2.6643745975   | 1.2906757956  | 1.2103394157  |
| H71  | 3.3165973216   | 0.6597554700  | -0.3087996292 |
| C72  | 5.4723560318   | 1.2490154706  | 1.3214688404  |
| H73  | 5.6417327552   | 1.4991393885  | 0.2667360780  |
| H74  | 5.0991982620   | 2.1390311793  | 1.8317734510  |
| H75  | 6.4404361089   | 0.9809896440  | 1.7623339299  |
| C76  | 3.2508066872   | 3.9111871562  | -0.9951988195 |
| H77  | 3.2019220377   | 3.3588867732  | -0.0555767905 |
| H78  | 2.8625516781   | 3.2659942303  | -1.7927671163 |
| H79  | 4.3042356933   | 4.1241434461  | -1.2184599015 |
| C80  | 3.0410509894   | 6.1471098626  | 0.1634830169  |
| H81  | 2.9612333587   | 5.7033829550  | 1.1583502757  |
| H82  | 4.1020309339   | 6.3387781733  | -0.0420593101 |
| H83  | 2.5222304701   | 7.1138925487  | 0.1784582583  |
| C84  | 2.6213018777   | 5.9434569606  | -2.2702202858 |
| H85  | 3.6855628342   | 6.1460048739  | -2.4376616198 |
| H86  | 2.2708514185   | 5.3333080964  | -3.1111421062 |
| H87  | 2.0980547065   | 6.9069907286  | -2.2973211239 |
| C88  | -3.4585574394  | 6.5135363585  | -1.6667664508 |
| H89  | -3.9653934029  | 6.1009121598  | -0.7864091860 |
| H90  | -2.9287745270  | 7.4215424016  | -1.3552274453 |
| H91  | -4.2334394182  | 6.8041376020  | -2.3872804807 |
| C92  | -3.2708770207  | 4.2379906824  | -2.7222601953 |
| H93  | -3.7664519272  | 3.7587688047  | -1.8696603906 |
| H94  | -4.0475019486  | 4.4949897686  | -3.4534849161 |
| H95  | -2.6055348049  | 3.4978954633  | -3.1824467374 |
| C96  | -1.8857360082  | 6.1310461352  | -3.5629276783 |
| H97  | -2.6882161343  | 6.3828225620  | -4.2661306524 |
| H98  | -1.3436317306  | 7.0576353184  | -3.3399640370 |
| H99  | -1.2012209003  | 5.4473440363  | -4.0788436504 |
| X100 | -1.2903698000# | 5.0372404000# | 5.7063048000# |
| X101 | 0.4272162000#  | 3.5033964000# | 7.5095546000# |
| C102 | 2.0454615691   | -0.1662991444 | 10.4256842257 |

|      |               |               |               |
|------|---------------|---------------|---------------|
| C103 | 1.4448247181  | -0.6170271038 | 9.2488371887  |
| C104 | 1.8225677269  | -0.0811476901 | 8.0210917565  |
| C105 | 2.8184361723  | 0.9073273150  | 7.9527880842  |
| C106 | 3.4111298693  | 1.3593497854  | 9.1386512521  |
| C107 | 3.0250046401  | 0.8225735685  | 10.3667673992 |
| H108 | 1.7531429996  | -0.5885188087 | 11.3834629666 |
| H109 | 0.6846585823  | -1.3932700399 | 9.2878915737  |
| H110 | 1.3563399467  | -0.4441592008 | 7.1079999226  |
| H111 | 4.1798739743  | 2.1261984860  | 9.1063151672  |
| H112 | 3.4974499731  | 1.1779044534  | 11.2788845884 |
| C113 | 7.2664392884  | 3.8215529562  | 6.8326259703  |
| C114 | 7.1397983760  | 2.4739477827  | 7.1727863855  |
| C115 | 5.9135548955  | 1.8327377718  | 7.0360707861  |
| C116 | 4.7956643149  | 2.5422210413  | 6.5689092223  |
| C117 | 4.9321410322  | 3.8867222996  | 6.2100215486  |
| C118 | 6.1665972084  | 4.5219897439  | 6.3462925984  |
| H119 | 8.2275098576  | 4.3191750436  | 6.9353710306  |
| H120 | 8.0012689692  | 1.9194096768  | 7.5359454793  |
| H121 | 5.8300788442  | 0.7766370740  | 7.2823069350  |
| H122 | 4.0924169698  | 4.4302678702  | 5.7827689265  |
| H123 | 6.2683741135  | 5.5654118690  | 6.0591999198  |
| C124 | -5.7480363832 | 4.0700325570  | 3.1200379924  |
| C125 | -4.9066931115 | 5.1552724534  | 2.8693683908  |
| C126 | -3.5490535189 | 4.9485734710  | 2.6456133813  |
| C127 | -3.0217637754 | 3.6469721776  | 2.6753974072  |
| C128 | -3.8714023881 | 2.5621281540  | 2.9231756709  |
| C129 | -5.2307829046 | 2.7766915840  | 3.1447107979  |
| H130 | -6.8091901597 | 4.2336461751  | 3.2899745952  |
| H131 | -5.3097648327 | 6.1642663257  | 2.8430100846  |
| H132 | -2.9015906874 | 5.7970426023  | 2.4380879699  |
| H133 | -3.4752614189 | 1.5503634918  | 2.9380505995  |
| H134 | -5.8861724126 | 1.9296760325  | 3.3304019866  |
| C135 | -0.6419428755 | -1.1445005869 | 2.3914411596  |
| C136 | -0.9737464959 | -0.4724706355 | 1.2146883033  |
| C137 | -1.1158612705 | 0.9122868636  | 1.2164770275  |
| C138 | -0.9371163100 | 1.6279869545  | 2.4071994846  |
| C139 | -0.5994973366 | 0.9522193830  | 3.5872261207  |
| C140 | -0.4475857828 | -0.4328212907 | 3.5738665090  |
| H141 | -0.5242622153 | -2.2251172435 | 2.3837637085  |
| H142 | -1.1140696273 | -1.0276681452 | 0.2910770493  |
| H143 | -1.3583617635 | 1.4388185339  | 0.2966676756  |
| H144 | -0.4513154176 | 1.5108407352  | 4.5089963035  |
| H145 | -0.1719668753 | -0.9567181568 | 4.4851776557  |

#### L1\_Zr\_3c

##### Fe(II)

|     |              |               |              |
|-----|--------------|---------------|--------------|
| Zr1 | 5.1874319633 | 11.0156666119 | 3.9171238447 |
| Fe2 | 3.2201102284 | 7.5010641892  | 4.1813954770 |
| N3  | 2.9079794808 | 10.5809885286 | 3.6454666186 |
| N4  | 5.2409152079 | 9.3916198604  | 5.5692166165 |



|     |              |               |               |
|-----|--------------|---------------|---------------|
| O5  | 4.6421165613 | 12.6114369134 | 2.6527787143  |
| O6  | 4.7997930662 | 12.2001052348 | 5.6996072845  |
| O7  | 5.7429785959 | 9.7627984972  | 2.4691772023  |
| O8  | 7.0766959554 | 11.5720583177 | 4.1528058198  |
| C9  | 6.8018761637 | 9.4562959235  | 1.6250641216  |
| C10 | 8.1459813646 | 12.3768684147 | 4.5245612158  |
| C11 | 3.7153971564 | 13.5258978640 | 2.5085265291  |
| C12 | 3.9804147307 | 14.7530668750 | 1.8147693100  |
| C13 | 2.9912509010 | 15.7300493616 | 1.8221603070  |
| H14 | 3.2053345259 | 16.6693440463 | 1.3224532331  |
| C15 | 1.7276218551 | 15.5922068504 | 2.4312285849  |
| C16 | 1.4464511439 | 14.3584560703 | 2.9920239716  |
| H17 | 0.4682031183 | 14.1660154421 | 3.4217097483  |
| C18 | 2.4025149826 | 13.3272435531 | 3.0091397781  |
| P19 | 1.7570923316 | 11.6852921068 | 3.3036440641  |
| C20 | 5.5142032738 | 12.3885139557 | 6.7805925626  |
| C21 | 5.5586255506 | 13.6680407394 | 7.4451319231  |
| C22 | 6.3997401935 | 13.8190965442 | 8.5397639150  |
| H23 | 6.4363273636 | 14.7926489285 | 9.0176339797  |
| C24 | 7.2190077384 | 12.8051342467 | 9.0738417779  |
| C25 | 7.1342793291 | 11.5687236070 | 8.4642398403  |
| H26 | 7.7240809238 | 10.7420027086 | 8.8455568314  |
| C27 | 6.2893995553 | 11.3429938566 | 7.3604405704  |
| P28 | 6.1743172872 | 9.6192652094  | 6.8891340637  |
| C29 | 2.4554865320 | 9.2462992812  | 3.4504736802  |
| C30 | 2.8514963632 | 8.3906921721  | 2.3708957684  |
| H31 | 3.6212529821 | 8.6387316575  | 1.6541106874  |
| C32 | 2.1320596011 | 7.1690392685  | 2.4769054494  |
| H33 | 2.2438576356 | 6.3081511869  | 1.8297725573  |
| C34 | 1.2773407380 | 7.2535925796  | 3.6161602140  |
| H35 | 0.6274905627 | 6.4700133075  | 3.9855330591  |
| C36 | 1.4753409743 | 8.5295288055  | 4.2225331654  |
| H37 | 1.0049661704 | 8.8868830686  | 5.1282711462  |
| C38 | 4.8001337607 | 8.0612710993  | 5.3448075962  |
| C39 | 5.2405147210 | 7.1814985833  | 4.3017666082  |
| H40 | 5.9293092111 | 7.4567571695  | 3.5173090340  |
| C41 | 4.5362105724 | 5.9507841680  | 4.4232189894  |
| H42 | 4.6212578092 | 5.1032262646  | 3.7547861851  |
| C43 | 3.6592366730 | 6.0494043981  | 5.5439143209  |
| H44 | 2.9644789678 | 5.2891335668  | 5.8779195140  |
| C45 | 3.8089464752 | 7.3495221084  | 6.1076903666  |
| H46 | 3.2524640006 | 7.7550331610  | 6.9408403248  |
| H47 | 6.5836824645 | 9.7663226130  | 0.5910174997  |
| H48 | 7.7265846853 | 9.9659645212  | 1.9427281365  |
| H49 | 6.9979496797 | 8.3704055686  | 1.6075655099  |
| H50 | 8.9313672513 | 11.7754110480 | 5.0075802002  |
| H51 | 8.5901161524 | 12.8656234181 | 3.6441537200  |
| H52 | 7.8380266363 | 13.1598244543 | 5.2320915273  |
| C53 | 4.4492365682 | 7.3984083342  | 10.5740254897 |
| C54 | 5.2394952149 | 6.7085819461  | 9.6549131601  |
| C55 | 5.7811092991 | 7.3739210929  | 8.5575155525  |

|      |               |               |               |
|------|---------------|---------------|---------------|
| C56  | 5.5428757952  | 8.7433647633  | 8.3697462456  |
| C57  | 4.7475928089  | 9.4299608103  | 9.2962022360  |
| C58  | 4.2038733504  | 8.7592182385  | 10.3904128752 |
| H59  | 4.0279244652  | 6.8776420622  | 11.4305922233 |
| H60  | 5.4328265809  | 5.6467640615  | 9.7878021924  |
| H61  | 6.3861759702  | 6.8225638793  | 7.8431088924  |
| H62  | 4.5638232243  | 10.4931086510 | 9.1639830367  |
| H63  | 3.5909625215  | 9.3045405921  | 11.1042432188 |
| C64  | 10.4474415106 | 7.9701285270  | 6.2043266953  |
| C65  | 9.6577085844  | 8.3877214974  | 5.1349960239  |
| C66  | 8.3693090801  | 8.8682678186  | 5.3581125129  |
| C67  | 7.8581872668  | 8.9323872108  | 6.6605415062  |
| C68  | 8.6562765547  | 8.5064417369  | 7.7319271254  |
| C69  | 9.9449331057  | 8.0303942228  | 7.5033472533  |
| H70  | 11.4525209070 | 7.5945783984  | 6.0262698184  |
| H71  | 10.0442194848 | 8.3420294088  | 4.1195702440  |
| H72  | 7.7617360297  | 9.2100666351  | 4.5253611696  |
| H73  | 8.2695260454  | 8.5273482886  | 8.7475830141  |
| H74  | 10.5541773033 | 7.7006072227  | 8.3416567905  |
| C75  | -1.2234100834 | 11.9706424333 | 6.8299823832  |
| C76  | -1.6931961910 | 12.1864177941 | 5.5352847144  |
| C77  | -0.8237337518 | 12.0951719109 | 4.4490357030  |
| C78  | 0.5270698806  | 11.7858848989 | 4.6525026595  |
| C79  | 0.9953962881  | 11.5693381699 | 5.9555218769  |
| C80  | 0.1218067264  | 11.6628358545 | 7.0366127753  |
| H81  | -1.9042030125 | 12.0396303422 | 7.6750260073  |
| H82  | -2.7413201987 | 12.4225254570 | 5.3664977279  |
| H83  | -1.2024069965 | 12.2534590586 | 3.4422528539  |
| H84  | 2.0435401311  | 11.3233017645 | 6.1106118979  |
| H85  | 0.4942143769  | 11.4927752912 | 8.0439465986  |
| C86  | -0.5082477916 | 10.5485069723 | -0.5710056025 |
| C87  | 0.4666680746  | 11.5436862240 | -0.5873346767 |
| C88  | 1.1206434587  | 11.9022561631 | 0.5887899846  |
| C89  | 0.8064680876  | 11.2658187591 | 1.7966170042  |
| C90  | -0.1736767326 | 10.2627928710 | 1.8043696916  |
| C91  | -0.8264852531 | 9.9095610431  | 0.6260634721  |
| H92  | -1.0197536627 | 10.2706833906 | -1.4898978401 |
| H93  | 0.7193654088  | 12.0470908101 | -1.5174998789 |
| H94  | 1.8749971669  | 12.6832246720 | 0.5697372739  |
| H95  | -0.4218678931 | 9.7480458474  | 2.7275456073  |
| H96  | -1.5833510793 | 9.1289594091  | 0.6446505252  |
| C99  | 5.2989467617  | 14.9541790312 | 1.0463976235  |
| C100 | 6.5039133832  | 14.9429064283 | 2.0068865643  |
| H101 | 6.5623563129  | 14.0042641607 | 2.5599421416  |
| H102 | 7.4347778151  | 15.0697971179 | 1.4376396759  |
| H103 | 6.4354011629  | 15.7667365570 | 2.7269542195  |
| C104 | 5.3275815713  | 16.2885233222 | 0.2832844235  |
| H105 | 5.2597734133  | 17.1529630502 | 0.9555173254  |
| H106 | 6.2773548707  | 16.3717986605 | -0.2585882746 |
| H107 | 4.5211714192  | 16.3620371826 | -0.4570359727 |
| C108 | 5.4525941900  | 13.8231446600 | 0.0071119040  |

|      |               |               |               |
|------|---------------|---------------|---------------|
| H109 | 6.3912601090  | 13.9482153829 | -0.5483636644 |
| H110 | 5.4652705134  | 12.8415895893 | 0.4868846248  |
| H111 | 4.6289364184  | 13.8469841305 | -0.7180818557 |
| C112 | 0.7314196698  | 16.7586755115 | 2.4102118192  |
| C113 | -0.5840334013 | 16.4072650006 | 3.1189093654  |
| H114 | -1.1028932300 | 15.5754608153 | 2.6270443252  |
| H115 | -0.4206372656 | 16.1364503764 | 4.1686223299  |
| H116 | -1.2589229343 | 17.2714562451 | 3.1001975802  |
| C117 | 1.3475995544  | 17.9769142525 | 3.1251593197  |
| H118 | 1.5782358649  | 17.7403027278 | 4.1703664393  |
| H119 | 2.2760786345  | 18.3046104999 | 2.6447010355  |
| H120 | 0.6496927557  | 18.8242312305 | 3.1136674356  |
| C121 | 0.4012995571  | 17.1346591121 | 0.9515197564  |
| H122 | -0.3114082461 | 17.9691878886 | 0.9208974575  |
| H123 | 1.2940768348  | 17.4411906660 | 0.3951734890  |
| H124 | -0.0469459588 | 16.2857352068 | 0.4213815082  |
| C125 | 4.7183985993  | 14.8536322931 | 6.9384301926  |
| C126 | 4.8607960582  | 16.0996151802 | 7.8268433505  |
| H127 | 4.5358189847  | 15.9144133547 | 8.8583752632  |
| H128 | 5.8891449408  | 16.4808990708 | 7.8518671577  |
| H129 | 4.2291351753  | 16.8997081896 | 7.4223120012  |
| C130 | 3.2258371202  | 14.4738861013 | 6.9252381829  |
| H131 | 2.8797472794  | 14.2230792119 | 7.9365180120  |
| H132 | 2.6246285256  | 15.3176557905 | 6.5630422717  |
| H133 | 3.0448126175  | 13.6200161188 | 6.2718676411  |
| C134 | 5.1761006530  | 15.2414003236 | 5.5195573379  |
| H135 | 4.5674868834  | 16.0700768508 | 5.1352159682  |
| H136 | 6.2239680259  | 15.5672833601 | 5.5288009130  |
| H137 | 5.0820223675  | 14.4026441121 | 4.8293350717  |
| C138 | 8.1270340128  | 13.0941238638 | 10.2755541217 |
| C139 | 7.2705636018  | 13.5300720285 | 11.4814791206 |
| H140 | 6.6828668374  | 14.4284275187 | 11.2626277204 |
| H141 | 6.5709483164  | 12.7365000887 | 11.7707720391 |
| H142 | 7.9080223751  | 13.7529380038 | 12.3470395293 |
| C143 | 9.1157902781  | 14.2211540127 | 9.9151243513  |
| H144 | 8.5949531157  | 15.1454172448 | 9.6419157021  |
| H145 | 9.7734608863  | 14.4475530319 | 10.7648041351 |
| H146 | 9.7448467821  | 13.9302233522 | 9.0657310067  |
| C147 | 8.9391143147  | 11.8600826186 | 10.6923909638 |
| H148 | 9.5883528240  | 12.1106568136 | 11.5401639648 |
| H149 | 8.2901058789  | 11.0338129809 | 11.0079338287 |
| H150 | 9.5810148052  | 11.5010265383 | 9.8787617232  |

Fe(III)

|     |              |               |              |
|-----|--------------|---------------|--------------|
| Zr1 | 5.3368248983 | 11.0113925296 | 3.7367808666 |
| Fe2 | 3.1359774543 | 7.4813512305  | 4.0791057808 |
| N3  | 2.9261019739 | 10.5979344085 | 3.5141696356 |
| N4  | 5.3357155833 | 9.3188198863  | 5.4405741515 |
| O5  | 4.7069262385 | 12.5440647999 | 2.5124241502 |
| O6  | 5.0121881860 | 12.1702064866 | 5.4954851485 |
| O7  | 5.6811162662 | 9.5941624192  | 2.3609071304 |

|     |              |               |               |
|-----|--------------|---------------|---------------|
| O8  | 7.2304115507 | 11.4388881899 | 3.8731996945  |
| C9  | 6.7150926989 | 9.1995365989  | 1.5090668454  |
| C10 | 8.4407895834 | 12.0909618658 | 4.1005035452  |
| C11 | 3.7842532549 | 13.4729917064 | 2.3581296582  |
| C12 | 4.0436375263 | 14.6375448832 | 1.5642503798  |
| C13 | 3.0730965151 | 15.6327140370 | 1.5310131387  |
| H14 | 3.2837446140 | 16.5222058323 | 0.9478850143  |
| C15 | 1.8284895637 | 15.5700392184 | 2.1908365907  |
| C16 | 1.5595192571 | 14.3994944521 | 2.8743202650  |
| H17 | 0.5958099464 | 14.2741468897 | 3.3557916455  |
| C18 | 2.5008710072 | 13.3523309682 | 2.9471929776  |
| P19 | 1.8112694049 | 11.8131435118 | 3.5379204654  |
| C20 | 5.4473488684 | 12.3494947476 | 6.7245390129  |
| C21 | 5.4100294961 | 13.6321564195 | 7.3725833298  |
| C22 | 5.8438718937 | 13.7135581325 | 8.6898319536  |
| H23 | 5.8013953927 | 14.6836817655 | 9.1716493538  |
| C24 | 6.3331255153 | 12.6376056322 | 9.4538853159  |
| C25 | 6.3964329401 | 11.4152435509 | 8.8150201474  |
| H26 | 6.7610911160 | 10.5474443246 | 9.3548984160  |
| C27 | 5.9699576088 | 11.2633017845 | 7.4773949583  |
| P28 | 6.2289249334 | 9.6374257694  | 6.7927283650  |
| C29 | 2.3946380281 | 9.3433564858  | 3.2788773163  |
| C30 | 2.8484954518 | 8.4303078368  | 2.2673886920  |
| H31 | 3.6707940458 | 8.6436018424  | 1.5985722143  |
| C32 | 2.0732353956 | 7.2348484193  | 2.3465803557  |
| H33 | 2.1636123708 | 6.3751314416  | 1.6948735528  |
| C34 | 1.1651670409 | 7.3715449659  | 3.4372770510  |
| H35 | 0.4554627995 | 6.6277248683  | 3.7769610479  |
| C36 | 1.3825125889 | 8.6471352157  | 4.0260318517  |
| H37 | 0.8965065678 | 9.0271798873  | 4.9152417678  |
| C38 | 4.8539223375 | 8.0277267067  | 5.2837889552  |
| C39 | 5.1636539773 | 7.1184375415  | 4.2149921840  |
| H40 | 5.8299213718 | 7.3456656673  | 3.3958224956  |
| C41 | 4.4141525964 | 5.9159613985  | 4.3967549501  |
| H42 | 4.4609012978 | 5.0377563378  | 3.7654945275  |
| C43 | 3.5882632929 | 6.0873950303  | 5.5458519580  |
| H44 | 2.8826861860 | 5.3680230379  | 5.9414879830  |
| C45 | 3.8313943641 | 7.3883271318  | 6.0649325964  |
| H46 | 3.3192064538 | 7.8399673086  | 6.9024022860  |
| H47 | 6.5166793311 | 9.5243770441  | 0.4772551847  |
| H48 | 7.6765210821 | 9.6306205833  | 1.8251465123  |
| H49 | 6.8210529248 | 8.1011754926  | 1.4909520437  |
| H50 | 9.2025727415 | 11.3733065080 | 4.4313137757  |
| H51 | 8.7936688592 | 12.5704553571 | 3.1779959116  |
| H52 | 8.3293085321 | 12.8642495112 | 4.8721775533  |
| C53 | 5.1889197430 | 6.5784996774  | 10.0961800559 |
| C54 | 6.2415381764 | 6.3237634887  | 9.2200720820  |
| C55 | 6.5770089434 | 7.2544960455  | 8.2382313351  |
| C56 | 5.8534936496 | 8.4472550075  | 8.1228174341  |
| C57 | 4.7930809120 | 8.6971039589  | 9.0076585861  |
| C58 | 4.4660905184 | 7.7675526351  | 9.9901739136  |

|      |               |               |               |
|------|---------------|---------------|---------------|
| H59  | 4.9364076910  | 5.8559463827  | 10.8682492405 |
| H60  | 6.8123699083  | 5.4027925718  | 9.3057486010  |
| H61  | 7.4096955950  | 7.0535523998  | 7.5696872674  |
| H62  | 4.2399259625  | 9.6304640948  | 8.9387417280  |
| H63  | 3.6519581798  | 7.9744128352  | 10.6804899326 |
| C64  | 10.6889580897 | 8.7675072651  | 5.9850764403  |
| C65  | 9.7090182272  | 8.2717236326  | 5.1270321277  |
| C66  | 8.3677218469  | 8.5755416836  | 5.3495320422  |
| C67  | 7.9972298676  | 9.3728900866  | 6.4380737413  |
| C68  | 8.9875697122  | 9.8821973709  | 7.2888154219  |
| C69  | 10.3267413684 | 9.5773382902  | 7.0610704914  |
| H70  | 11.7354737335 | 8.5309590852  | 5.8103721567  |
| H71  | 9.9887793731  | 7.6529339095  | 4.2781021889  |
| H72  | 7.6085477386  | 8.2102534119  | 4.6662013472  |
| H73  | 8.7183349051  | 10.5257911219 | 8.1211081683  |
| H74  | 11.0895903954 | 9.9785644319  | 7.7232556291  |
| C75  | -0.0505369113 | 12.2292710951 | 7.7451003437  |
| C76  | -0.7176692835 | 12.7806048780 | 6.6516903684  |
| C77  | -0.1796602673 | 12.6627937283 | 5.3733583757  |
| C78  | 1.0392608292  | 11.9946084487 | 5.1793122540  |
| C79  | 1.7075309234  | 11.4477523876 | 6.2820034230  |
| C80  | 1.1600030640  | 11.5642864624 | 7.5579751020  |
| H81  | -0.4752783961 | 12.3192635927 | 8.7419167319  |
| H82  | -1.6632424163 | 13.2980538876 | 6.7917600857  |
| H83  | -0.7261492543 | 13.0754553500 | 4.5297848436  |
| H84  | 2.6614139671  | 10.9475033474 | 6.1353000858  |
| H85  | 1.6856376730  | 11.1430075782 | 8.4113364193  |
| C86  | -1.4994176254 | 10.7511672465 | 0.4930832225  |
| C87  | -0.3155825762 | 11.3649586887 | 0.0844197714  |
| C88  | 0.6552201337  | 11.7053821644 | 1.0211539774  |
| C89  | 0.4528734939  | 11.4268937391 | 2.3814323050  |
| C90  | -0.7369912341 | 10.8046633907 | 2.7839318097  |
| C91  | -1.7087872723 | 10.4728888798 | 1.8419246045  |
| H92  | -2.2610341824 | 10.4954490684 | -0.2394257949 |
| H93  | -0.1517828734 | 11.5892800520 | -0.9664571575 |
| H94  | 1.5673938383  | 12.2013499152 | 0.6993487357  |
| H95  | -0.9180313652 | 10.5878264823 | 3.8326577588  |
| H96  | -2.6329402974 | 10.0003566342 | 2.1655503423  |
| C99  | 5.3357061587  | 14.7583867571 | 0.7338478891  |
| C100 | 6.5819659927  | 14.7549382003 | 1.6419467758  |
| H101 | 6.6522792143  | 13.8376234065 | 2.2284521159  |
| H102 | 7.4879088912  | 14.8416395795 | 1.0282819790  |
| H103 | 6.5637582483  | 15.6059649406 | 2.3325075019  |
| C104 | 5.3715709039  | 16.0570593873 | -0.0874674960 |
| H105 | 5.3722723090  | 16.9508335799 | 0.5480619243  |
| H106 | 6.2931085627  | 16.0806975680 | -0.6801494138 |
| H107 | 4.5311470839  | 16.1299716251 | -0.7883404375 |
| C108 | 5.4068898547  | 13.5833616763 | -0.2646812003 |
| H109 | 6.3218559063  | 13.6578962620 | -0.8654543611 |
| H110 | 5.4121832829  | 12.6194550221 | 0.2489814800  |
| H111 | 4.5533156192  | 13.6066314675 | -0.9537693828 |

|      |               |               |               |
|------|---------------|---------------|---------------|
| C112 | 0.8336513198  | 16.7341124475 | 2.0873726915  |
| C113 | -0.4600929479 | 16.4577900368 | 2.8667581623  |
| H114 | -0.9953346463 | 15.5839285284 | 2.4744051556  |
| H115 | -0.2679332632 | 16.2978192382 | 3.9347455013  |
| H116 | -1.1349622140 | 17.3168376804 | 2.7800916140  |
| C117 | 1.4783623910  | 18.0125327646 | 2.6594558623  |
| H118 | 1.7370618186  | 17.8822335743 | 3.7167875581  |
| H119 | 2.3935958776  | 18.2855418404 | 2.1228039567  |
| H120 | 0.7846446313  | 18.8587407500 | 2.5823948134  |
| C121 | 0.4605476508  | 16.9622338745 | 0.6085962538  |
| H122 | -0.2502920653 | 17.7926901839 | 0.5179603618  |
| H123 | 1.3351574183  | 17.2087371419 | -0.0030128488 |
| H124 | -0.0071567037 | 16.0681710633 | 0.1795174633  |
| C125 | 4.9231594839  | 14.8958412016 | 6.6434611803  |
| C126 | 5.0443311361  | 16.1583677944 | 7.5118464068  |
| H127 | 4.4207779497  | 16.1080702496 | 8.4128982719  |
| H128 | 6.0787392188  | 16.3598937986 | 7.8151682654  |
| H129 | 4.7017767299  | 17.0220538281 | 6.9304763437  |
| C130 | 3.4390927381  | 14.7411285057 | 6.2683164882  |
| H131 | 2.8216058639  | 14.6114473633 | 7.1655118926  |
| H132 | 3.0869900752  | 15.6362304494 | 5.7411315809  |
| H133 | 3.2841292723  | 13.8835233163 | 5.6143539439  |
| C134 | 5.7711351918  | 15.1331452208 | 5.3797159449  |
| H135 | 5.4179696658  | 16.0306290520 | 4.8572486460  |
| H136 | 6.8245708104  | 15.2916003573 | 5.6424740574  |
| H137 | 5.7091996795  | 14.2927100001 | 4.6882509784  |
| C138 | 6.7513746604  | 12.8503562286 | 10.9143516257 |
| C139 | 5.5330189784  | 13.3353250548 | 11.7251686771 |
| H140 | 5.1291304689  | 14.2752342130 | 11.3333231048 |
| H141 | 4.7275584508  | 12.5915159255 | 11.7052852930 |
| H142 | 5.8110899321  | 13.5047530854 | 12.7726517601 |
| C143 | 7.8688368755  | 13.9098128812 | 10.9846645169 |
| H144 | 7.5471491427  | 14.8744145433 | 10.5775748910 |
| H145 | 8.1735139896  | 14.0756840095 | 12.0252674684 |
| H146 | 8.7519256693  | 13.5872676073 | 10.4206651440 |
| C147 | 7.2736188918  | 11.5596254908 | 11.5610823146 |
| H148 | 7.5524332786  | 11.7530989644 | 12.6031377191 |
| H149 | 6.5156867401  | 10.7667476225 | 11.5666441872 |
| H150 | 8.1668943612  | 11.1774820100 | 11.0516640734 |

L2\_Y\_1a

Fe(II)

|     |              |               |              |
|-----|--------------|---------------|--------------|
| Y1  | 4.6583824861 | 10.9994676586 | 3.8866129852 |
| Fe2 | 2.1526366665 | 8.7177817758  | 6.3282922949 |
| N3  | 2.2423400723 | 11.3456179243 | 4.6705419058 |
| N4  | 5.1206827610 | 9.0627396094  | 5.5719763425 |
| O5  | 4.0493245330 | 12.6667888196 | 2.6925152880 |
| O6  | 6.1027166573 | 11.8565841931 | 5.2017982650 |
| O7  | 5.0491765881 | 9.4305602050  | 2.5988841784 |
| C9  | 5.3892982357 | 8.8111350455  | 1.4009128076 |

|     |               |               |               |
|-----|---------------|---------------|---------------|
| C11 | 3.3139390087  | 13.7225648565 | 3.0151634800  |
| C12 | 3.8001758369  | 15.0343222066 | 2.8654995929  |
| C13 | 3.0169891089  | 16.1249419904 | 3.2237725869  |
| H14 | 3.4172353717  | 17.1296664710 | 3.1038906872  |
| C15 | 1.7293611001  | 15.9472843623 | 3.7356143951  |
| C16 | 1.2350009564  | 14.6544436719 | 3.8818626719  |
| H17 | 0.2297483969  | 14.4992056188 | 4.2731265543  |
| C18 | 2.0041353831  | 13.5434784498 | 3.5270915469  |
| C19 | 1.4698882257  | 12.1507904227 | 3.6569626865  |
| H20 | 1.5460349865  | 11.6042337683 | 2.7090692181  |
| H21 | 0.4123061653  | 12.1700955083 | 3.9509889107  |
| H22 | 2.3146791990  | 11.9254043051 | 5.5095205961  |
| C23 | 6.5035623328  | 11.6814430707 | 6.4561185664  |
| C24 | 6.7102005624  | 12.7845936455 | 7.3040075776  |
| C25 | 7.1098350675  | 12.6029385525 | 8.6238050684  |
| H26 | 7.2585851709  | 13.4729481956 | 9.2603968927  |
| C27 | 7.3180383267  | 11.3216723416 | 9.1366029914  |
| C28 | 7.1187674436  | 10.2224659123 | 8.3045883601  |
| H29 | 7.2737730009  | 9.2159096897  | 8.6913832635  |
| C30 | 6.7192517176  | 10.3804189479 | 6.9763398113  |
| C31 | 6.5235575609  | 9.1959301190  | 6.0772341168  |
| H32 | 6.8229901716  | 8.2745130842  | 6.5962984877  |
| H33 | 7.1460051108  | 9.2912733928  | 5.1774393208  |
| H34 | 5.1292977388  | 8.3815845526  | 4.8111630154  |
| C35 | 1.5521388318  | 10.1381115045 | 5.0180808476  |
| C36 | 1.7063183585  | 8.8899582283  | 4.3391074843  |
| H37 | 2.3924644604  | 8.6903311968  | 3.5228904788  |
| C38 | 0.8269392583  | 7.9522361020  | 4.9538560944  |
| H39 | 0.7408139178  | 6.9048644299  | 4.6958667640  |
| C40 | 0.1237276117  | 8.6169422727  | 5.9993980185  |
| H41 | -0.5850693632 | 8.1601085045  | 6.6780343206  |
| C42 | 0.5593486938  | 9.9719132058  | 6.0367924048  |
| H43 | 0.2359788548  | 10.7318659736 | 6.7376839041  |
| C44 | 4.1787856359  | 8.6460258059  | 6.5552732816  |
| C45 | 3.6196388591  | 7.3379748358  | 6.7128843587  |
| H46 | 3.8306461690  | 6.4802770521  | 6.0858253550  |
| C47 | 2.6918941236  | 7.3850675071  | 7.7934704573  |
| H48 | 2.0692661880  | 6.5666843044  | 8.1316637843  |
| C49 | 2.6865413285  | 8.7114374991  | 8.3129312996  |
| H50 | 2.0641992326  | 9.0754411781  | 9.1204507234  |
| C51 | 3.6014860394  | 9.4935219795  | 7.5501873605  |
| H52 | 3.8271928056  | 10.5423018349 | 7.6919149244  |
| H53 | 5.0649287011  | 7.7572710985  | 1.3893802862  |
| H54 | 4.9216998837  | 9.3083789110  | 0.5358274304  |
| H55 | 6.4790424869  | 8.8175226862  | 1.2356867107  |
| H59 | 4.8027801089  | 15.1672163889 | 2.4677212551  |
| H60 | 1.1216138655  | 16.8035159962 | 4.0156487938  |
| H61 | 6.5492622305  | 13.7798459091 | 6.8973218264  |
| H62 | 7.6274414867  | 11.1806665038 | 10.1689212273 |

Fe(III)

|     |               |               |              |
|-----|---------------|---------------|--------------|
| Y1  | 4.6646059560  | 11.1347768054 | 3.5005815410 |
| Fe2 | 2.4638880154  | 8.6572584544  | 6.4623865015 |
| N3  | 2.5441445264  | 11.5745766896 | 4.8460109844 |
| N4  | 5.7152048655  | 8.6388792879  | 5.6565244094 |
| O5  | 3.8277371034  | 12.5729104362 | 2.2241656541 |
| O6  | 5.6758792184  | 11.6013879614 | 5.2523656100 |
| O7  | 5.2087808234  | 9.2114324943  | 2.9179894264 |
| C9  | 5.4781386855  | 8.3159467187  | 1.8639749862 |
| C11 | 3.2416168564  | 13.7098733486 | 2.6379113117 |
| C12 | 3.7122925401  | 14.9619444239 | 2.2182553388 |
| C13 | 3.1055210389  | 16.1285217026 | 2.6699956287 |
| H14 | 3.4831951475  | 17.0907241086 | 2.3332122033 |
| C15 | 2.0185309965  | 16.0770818545 | 3.5450797047 |
| C16 | 1.5397761856  | 14.8398131591 | 3.9602550106 |
| H17 | 0.6825848403  | 14.7884289521 | 4.6300690566 |
| C18 | 2.1327359301  | 13.6521951200 | 3.5153331101 |
| C19 | 1.5812570822  | 12.3247285657 | 3.9336666141 |
| H20 | 1.3944314151  | 11.6769105664 | 3.0697842756 |
| H21 | 0.6349851675  | 12.4606833512 | 4.4693558184 |
| H22 | 2.9641051790  | 12.2705270188 | 5.4682163192 |
| C23 | 5.8165435984  | 11.6253743756 | 6.5808958477 |
| C24 | 5.4597464846  | 12.7648205567 | 7.3189552756 |
| C25 | 5.5939501265  | 12.7807642074 | 8.7052534004 |
| H26 | 5.3219834897  | 13.6757178288 | 9.2596662135 |
| C27 | 6.0897829242  | 11.6652934770 | 9.3794368056 |
| C28 | 6.4511370439  | 10.5348011482 | 8.6487088966 |
| H29 | 6.8614880848  | 9.6688234994  | 9.1675262507 |
| C30 | 6.3163234601  | 10.4925487169 | 7.2590668776 |
| C31 | 6.7518698420  | 9.2758238635  | 6.4777807793 |
| H32 | 7.1559545378  | 8.5234296931  | 7.1660604496 |
| H33 | 7.5552566171  | 9.5370980561  | 5.7809333366 |
| H34 | 5.7803867939  | 8.6968886905  | 4.6290499731 |
| C35 | 1.8721173755  | 10.6252242060 | 5.6609623530 |
| C36 | 1.0148434063  | 9.5910231252  | 5.1892758661 |
| H37 | 0.8382048943  | 9.3317465149  | 4.1528888028 |
| C38 | 0.4039338563  | 8.9715744977  | 6.3169012245 |
| H39 | -0.3235490852 | 8.1712198635  | 6.2766097159 |
| C40 | 0.9374305030  | 9.5716781485  | 7.4919452057 |
| H41 | 0.6717097469  | 9.3323549176  | 8.5132652795 |
| C42 | 1.8704709971  | 10.5806512368 | 7.0854781800 |
| H43 | 2.4462390038  | 11.2264615852 | 7.7378737581 |
| C44 | 4.6462149174  | 8.0121020163  | 6.1376173459 |
| C45 | 3.6318073710  | 7.3528953078  | 5.3438768572 |
| H46 | 3.6511179320  | 7.2770157675  | 4.2645385319 |
| C47 | 2.7464462062  | 6.6643056071  | 6.2264899331 |
| H48 | 1.9512701887  | 5.9941752894  | 5.9258669557 |
| C49 | 3.0691518192  | 7.0562790926  | 7.5579190508 |
| H50 | 2.5638043857  | 6.7351686654  | 8.4600683267 |
| C51 | 4.1653233632  | 7.9692253536  | 7.4966601882 |
| H52 | 4.6256179340  | 8.4701545441  | 8.3370312519 |
| H53 | 5.1016443140  | 7.3100809955  | 2.0994584824 |



|     |              |               |               |
|-----|--------------|---------------|---------------|
| H54 | 5.0032080838 | 8.6392127989  | 0.9272714906  |
| H55 | 6.5590142566 | 8.2361657477  | 1.6874139781  |
| H59 | 4.5514896566 | 14.9955118726 | 1.5288590640  |
| H60 | 1.5457844162 | 16.9912050901 | 3.8920841785  |
| H61 | 5.1128378717 | 13.6452630091 | 6.7817392315  |
| H62 | 6.2093684350 | 11.6809217191 | 10.4589547387 |

L3\_Y\_1d

Fe(II)

|     |               |               |               |
|-----|---------------|---------------|---------------|
| Y1  | 2.0795504253  | 3.3461004529  | 3.5250856253  |
| Fe2 | -0.2024907460 | 4.1271821607  | 6.7127511596  |
| O3  | 1.4955154319  | 4.1111724816  | 1.5925901680  |
| O4  | 2.7731799971  | 1.3269154776  | 3.1718345692  |
| O5  | 3.4249495306  | 4.5415563193  | 4.4903770816  |
| C6  | -0.6334280066 | 4.9044066409  | 4.8672189240  |
| C7  | 0.1686706117  | 5.8181192775  | 5.6165724563  |
| H8  | 1.1536284604  | 6.1674789493  | 5.3334748773  |
| C9  | -0.5459053617 | 6.1450629116  | 6.8047188509  |
| H10 | -0.1895230736 | 6.7898003355  | 7.5973284556  |
| C11 | -1.7781279006 | 5.4275930409  | 6.7993815509  |
| H12 | -2.5231230409 | 5.4348393366  | 7.5843810076  |
| C13 | -1.8382808936 | 4.6638725318  | 5.5976871685  |
| H14 | -2.6421198153 | 4.0030493979  | 5.2962330732  |
| C15 | 0.7827910037  | 2.3482494615  | 6.4969490421  |
| C16 | 1.6042451414  | 3.2889958247  | 7.1907546967  |
| H17 | 2.5615278125  | 3.6583330352  | 6.8448730875  |
| C18 | 0.9108567968  | 3.6795691038  | 8.3718989351  |
| H19 | 1.2558171587  | 4.4086929444  | 9.0932135839  |
| C20 | -0.3391240141 | 2.9932565683  | 8.4065553531  |
| H21 | -1.1087473012 | 3.1066299442  | 9.1593486486  |
| C22 | -0.4176870632 | 2.1618682436  | 7.2511499088  |
| H23 | -1.2472390919 | 1.5211724193  | 6.9761162073  |
| C24 | -0.3645685531 | 5.2751519239  | 2.4592577358  |
| C25 | -1.3402981145 | 6.2628436073  | 2.3937156233  |
| H26 | -2.0465184879 | 6.3878373387  | 3.2109902741  |
| C27 | -1.3847563828 | 7.0818828917  | 1.2726444612  |
| C28 | -0.4665911120 | 6.8839660043  | 0.2398858445  |
| H29 | -0.5310441781 | 7.5340614582  | -0.6268427714 |
| C30 | 0.5884219088  | 5.0720888130  | 1.4348302619  |
| C31 | 2.1487079710  | 0.6627118879  | 5.3487235864  |
| C32 | 2.2729395049  | -0.1420919079 | 6.4746562811  |
| H33 | 1.6278607365  | 0.0219833889  | 7.3348172907  |
| C34 | 3.2363795906  | -1.1419987773 | 6.4801507142  |
| C35 | 4.0410424820  | -1.3229259732 | 5.3533997995  |
| H36 | 4.7804201379  | -2.1171112114 | 5.3813504208  |
| C37 | 2.9630827030  | 0.5048821238  | 4.2033194861  |
| C38 | 4.5223377946  | 5.3074344197  | 4.8667312555  |
| H39 | 4.2335791634  | 6.0889397697  | 5.5886866674  |
| H40 | 5.3013916903  | 4.6900680986  | 5.3411173098  |
| H41 | 4.9798317580  | 5.8134907324  | 4.0021927113  |

|     |                |               |               |
|-----|----------------|---------------|---------------|
| C42 | 3.9376892308   | -0.5342572230 | 4.2037424518  |
| C43 | 0.5250441365   | 5.8993477756  | 0.2772673720  |
| N44 | 1.1355310746   | 1.7214108109  | 5.2595479980  |
| N45 | -0.2710934655  | 4.3523176470  | 3.5982661566  |
| C46 | 1.5199248742   | 5.7083272755  | -0.8765446346 |
| C47 | 1.2578716917   | 6.6843396950  | -2.0329944425 |
| H48 | 0.2576549392   | 6.5543093330  | -2.4639747544 |
| H49 | 1.3667387171   | 7.7305550556  | -1.7221668482 |
| H50 | 1.9864195248   | 6.5021460270  | -2.8320083922 |
| C51 | 2.9569909354   | 5.9542618139  | -0.3740778497 |
| H52 | 3.0668117209   | 6.9796310543  | 0.0004150602  |
| H53 | 3.2164418292   | 5.2625265062  | 0.4304580209  |
| H54 | 3.6734755408   | 5.8154463801  | -1.1942748499 |
| C55 | 1.3983121048   | 4.2755439300  | -1.4353742308 |
| H56 | 2.1160691960   | 4.1269675326  | -2.2528163784 |
| H57 | 1.5972864197   | 3.5318090690  | -0.6602030893 |
| H58 | 0.3916367166   | 4.1002223726  | -1.8349659906 |
| C59 | 4.8352607636   | -0.7689544526 | 2.9798357442  |
| C60 | 3.9610288767   | -1.0889204102 | 1.7500475453  |
| H61 | 3.2696816843   | -0.2705589860 | 1.5356071398  |
| H62 | 4.5943213321   | -1.2502399328 | 0.8677641247  |
| H63 | 3.3775078788   | -2.0028531018 | 1.9176379169  |
| C64 | 5.6875968630   | 0.4863153050  | 2.7035218962  |
| H65 | 5.0557727868   | 1.3546068301  | 2.5044571431  |
| H66 | 6.3328943662   | 0.7149185819  | 3.5608358232  |
| H67 | 6.3320705123   | 0.3215134127  | 1.8301428126  |
| C68 | 5.7989932757   | -1.9469960312 | 3.1872843561  |
| H69 | 6.4028787977   | -2.0835113532 | 2.2822211229  |
| H70 | 6.4913780232   | -1.7730992023 | 4.0201031461  |
| H71 | 5.2662962341   | -2.8878435385 | 3.3721641656  |
| X72 | -1.6700556444# | 4.7970981656# | 5.4075773579# |
| X73 | 0.6145324225#  | 4.1123818282# | 7.7180422565# |
| H74 | -2.1329098578  | 7.8661865662  | 1.1947656216  |
| H75 | 3.3638462725   | -1.7788777135 | 7.3510873448  |
| H76 | 0.2895625208   | 1.3162250447  | 4.8527044154  |
| H77 | -0.8858017872  | 3.5564656616  | 3.4119990414  |

Fe(III)

|     |               |              |              |
|-----|---------------|--------------|--------------|
| Y1  | 1.8553588185  | 3.1204138793 | 3.3801369558 |
| Fe2 | -0.2452713916 | 4.1322856146 | 6.7336480596 |
| O3  | 1.2619014479  | 3.9604653328 | 1.5228396469 |
| O4  | 2.5399998611  | 1.1070474690 | 3.1670537957 |
| O5  | 3.0426115532  | 4.3764781210 | 4.4555329835 |
| C6  | -0.7733825585 | 4.9729388674 | 4.7816553264 |
| C7  | 0.1009960333  | 5.8324345002 | 5.5094359436 |
| H8  | 1.0800865173  | 6.1478991257 | 5.1711665834 |
| C9  | -0.5365549439 | 6.1774738120 | 6.7361313365 |
| H10 | -0.1318794053 | 6.8368190210 | 7.4932230479 |
| C11 | -1.7807472643 | 5.4825652400 | 6.8013586657 |
| H12 | -2.5019760448 | 5.5277980651 | 7.6072110704 |

|     |               |               |               |
|-----|---------------|---------------|---------------|
| C13 | -1.9096463476 | 4.7090962037  | 5.6060370969  |
| H14 | -2.7478441767 | 4.0741901424  | 5.3445877409  |
| C15 | 0.7678380269  | 2.1964748051  | 6.5881069672  |
| C16 | 1.5875795877  | 3.1833285901  | 7.2136633039  |
| H17 | 2.5479868333  | 3.5129443847  | 6.8378052677  |
| C18 | 0.9077503130  | 3.6554175937  | 8.3732808843  |
| H19 | 1.2864668692  | 4.3921449511  | 9.0700389911  |
| C20 | -0.3627954064 | 3.0089408771  | 8.4369582807  |
| H21 | -1.1206751034 | 3.1498636238  | 9.1972535539  |
| C22 | -0.4616571550 | 2.1312135231  | 7.3130617644  |
| H23 | -1.3063880206 | 1.4961254726  | 7.0731629869  |
| C24 | -0.3432669010 | 5.4154056917  | 2.4472158924  |
| C25 | -1.1188850057 | 6.5732891690  | 2.4419124154  |
| H26 | -1.8333709913 | 6.7702339555  | 3.2379626432  |
| C27 | -0.9633286346 | 7.4599139374  | 1.3887790133  |
| C28 | -0.0618750992 | 7.1621253274  | 0.3634151784  |
| H29 | 0.0301775589  | 7.8758344738  | -0.4478354852 |
| C30 | 0.5750506426  | 5.0982393347  | 1.4237391341  |
| C31 | 2.3187421168  | 0.6949837634  | 5.4800405818  |
| C32 | 2.7194285198  | 0.1068356894  | 6.6785223344  |
| H33 | 2.1552839595  | 0.2705651785  | 7.5941977527  |
| C34 | 3.8483502442  | -0.6950247620 | 6.6740075376  |
| C35 | 4.5249212849  | -0.9231665717 | 5.4715605825  |
| H36 | 5.3923749439  | -1.5732882218 | 5.4988306727  |
| C37 | 3.0004267183  | 0.4927464938  | 4.2593069687  |
| C38 | 4.1521004064  | 5.1399136319  | 4.8367731317  |
| H39 | 3.8811903340  | 5.8583941321  | 5.6267268396  |
| H40 | 4.9598986776  | 4.5034754680  | 5.2245899016  |
| H41 | 4.5497504795  | 5.7158214433  | 3.9899529386  |
| C42 | 4.1321183934  | -0.3719906609 | 4.2495615325  |
| C43 | 0.7146248694  | 6.0016730739  | 0.3329163713  |
| N44 | 1.0968884221  | 1.5096003322  | 5.4145448195  |
| N45 | -0.4880782771 | 4.4204245082  | 3.5230669405  |
| C46 | 1.6791335493  | 5.7027648465  | -0.8241781628 |
| C47 | 1.6465462275  | 6.7995538047  | -1.8998183143 |
| H48 | 0.6537540126  | 6.9059892699  | -2.3529092653 |
| H49 | 1.9564338319  | 7.7755331588  | -1.5071612286 |
| H50 | 2.3443047138  | 6.5363295427  | -2.7025591350 |
| C51 | 3.1239370834  | 5.6158821161  | -0.2931213321 |
| H52 | 3.4259844738  | 6.5603291170  | 0.1755863318  |
| H53 | 3.2341594367  | 4.8124825394  | 0.4393405042  |
| H54 | 3.8147444309  | 5.4165368260  | -1.1212665733 |
| C55 | 1.2832596757  | 4.3715606857  | -1.4956824761 |
| H56 | 1.9675534078  | 4.1536233629  | -2.3247226106 |
| H57 | 1.3235427351  | 3.5384612727  | -0.7898803568 |
| H58 | 0.2679993179  | 4.4299606415  | -1.9061338920 |
| C59 | 4.8782772134  | -0.6862226458 | 2.9434223836  |
| C60 | 3.9042707309  | -1.3370976859 | 1.9397879338  |
| H61 | 3.0606549949  | -0.6801021215 | 1.7148452143  |
| H62 | 4.4286656952  | -1.5574432665 | 1.0021078171  |
| H63 | 3.5133407681  | -2.2825245091 | 2.3348140988  |

|     |                |               |               |
|-----|----------------|---------------|---------------|
| C64 | 5.4643104548   | 0.6064999776  | 2.3422119094  |
| H65 | 4.6765618896   | 1.3141941131  | 2.0733814594  |
| H66 | 6.1488845438   | 1.0928904174  | 3.0478012689  |
| H67 | 6.0308162035   | 0.3726117496  | 1.4327975962  |
| C68 | 6.0435147587   | -1.6634149268 | 3.1660072031  |
| H69 | 6.5337190418   | -1.8616857815 | 2.2064309680  |
| H70 | 6.8051713471   | -1.2561236911 | 3.8418629158  |
| H71 | 5.7045685881   | -2.6273605849 | 3.5634902863  |
| X72 | -1.6700556444# | 4.7970981656# | 5.4075773579# |
| X73 | 0.6145324225#  | 4.1123818282# | 7.7180422565# |
| H74 | -1.5494486528  | 8.3734156578  | 1.3491868482  |
| H75 | 4.1961867799   | -1.1596173500 | 7.5917689515  |
| H76 | 0.3130300854   | 0.9331456389  | 5.1038730641  |
| H77 | -1.2113503220  | 3.7460002348  | 3.2645315616  |

L3\_Zr\_1d

Fe(II)

|     |               |               |              |
|-----|---------------|---------------|--------------|
| Zr1 | 6.0470504222  | 12.2290474739 | 4.1169150427 |
| Fe2 | 1.9393349912  | 8.8081488881  | 6.0835687987 |
| N3  | 2.2667530898  | 11.6884464766 | 5.0187694124 |
| N4  | 4.8403921750  | 9.9628622510  | 6.5117813083 |
| O5  | 4.2909319042  | 13.1018773887 | 3.8970618512 |
| O6  | 6.5866233827  | 11.9527220991 | 5.9974138232 |
| O7  | 5.9940511318  | 10.4740303145 | 3.2748022447 |
| O8  | 7.4448758350  | 13.3093724063 | 3.3373513326 |
| C9  | 3.0316546037  | 13.4140064265 | 3.4839578158 |
| C10 | 2.7680511970  | 14.4268007421 | 2.5342347850 |
| C11 | 1.4304556409  | 14.6192780638 | 2.1596025741 |
| H12 | 1.1820594080  | 15.3841632678 | 1.4331983599 |
| C13 | 0.3988691612  | 13.8506014831 | 2.6876689109 |
| C14 | 0.6672163732  | 12.8695268266 | 3.6296672361 |
| H15 | -0.1316981576 | 12.2723901038 | 4.0591749646 |
| C16 | 1.9830869226  | 12.6474026293 | 4.0454035152 |
| C17 | 3.8820955787  | 15.2763695430 | 1.8964676078 |
| C18 | 4.8021890192  | 14.3815279513 | 1.0419808971 |
| H19 | 4.2251988772  | 13.8664977913 | 0.2649009295 |
| H20 | 5.3141085048  | 13.6235723602 | 1.6394867146 |
| H21 | 5.5717983183  | 14.9874533672 | 0.5460000476 |
| C22 | 4.6906160673  | 16.0117414890 | 2.9830785016 |
| H23 | 5.4909121773  | 16.6069973426 | 2.5240889466 |
| H24 | 5.1449094655  | 15.3212290398 | 3.6960374646 |
| H25 | 4.0423191770  | 16.6948746910 | 3.5444438832 |
| C26 | 3.3195177010  | 16.3545520123 | 0.9527265153 |
| H27 | 4.1483229521  | 16.9482620851 | 0.5489465265 |
| H28 | 2.6424433301  | 17.0423142209 | 1.4719791432 |
| H29 | 2.7835030121  | 15.9198480891 | 0.1010705116 |
| C30 | 6.6493969213  | 11.4124876452 | 7.2337512452 |
| C31 | 7.5861614795  | 11.8669171728 | 8.1904202113 |
| C32 | 7.5743953282  | 11.2418505701 | 9.4440782885 |

|     |               |               |               |
|-----|---------------|---------------|---------------|
| H33 | 8.2700155247  | 11.5645529567 | 10.2103309257 |
| C34 | 6.6987900268  | 10.2030608915 | 9.7387931724  |
| C35 | 5.8002189968  | 9.7492165718  | 8.7821870597  |
| H36 | 5.1379079667  | 8.9194361146  | 9.0027609813  |
| C37 | 5.7584051850  | 10.3560474259 | 7.5258584944  |
| C38 | 8.5822556015  | 12.9963971122 | 7.8789303400  |
| C39 | 7.8239507615  | 14.2970955114 | 7.5475918840  |
| H40 | 8.5339030989  | 15.1028558014 | 7.3198544891  |
| H41 | 7.2125926264  | 14.6164511551 | 8.3999046538  |
| H42 | 7.1629341189  | 14.1714369799 | 6.6874936056  |
| C43 | 9.4929313948  | 12.5896979239 | 6.7025013985  |
| H44 | 8.9224341736  | 12.4099677084 | 5.7891047588  |
| H45 | 10.0507423498 | 11.6766199780 | 6.9438924175  |
| H46 | 10.2218168247 | 13.3847310708 | 6.4982242136  |
| C47 | 9.4997147481  | 13.2965203300 | 9.0756442749  |
| H48 | 10.1074708287 | 12.4280596875 | 9.3562323920  |
| H49 | 8.9355787289  | 13.6230471732 | 9.9571345333  |
| H50 | 10.1879849748 | 14.1069070634 | 8.8075884097  |
| C51 | 1.5025746073  | 10.5038319355 | 5.0573891689  |
| C52 | 1.5956576813  | 9.3940914751  | 4.1523968472  |
| H53 | 2.3030500121  | 9.3120948613  | 3.3369464495  |
| C54 | 0.6344206716  | 8.4220050489  | 4.5441385504  |
| H55 | 0.4832891921  | 7.4523779641  | 4.0866222806  |
| C56 | -0.0675702375 | 8.9268799176  | 5.6801739892  |
| H57 | -0.8382064170 | 8.4032246431  | 6.2317655475  |
| C58 | 0.4595270591  | 10.2110124537 | 5.9940214467  |
| H59 | 0.1703974528  | 10.8496046655 | 6.8185500004  |
| C60 | 3.8720127817  | 8.9830073988  | 6.8124555984  |
| C61 | 3.6926053666  | 7.7250492798  | 6.1577157826  |
| H62 | 4.2552445741  | 7.3746506120  | 5.3011020317  |
| C63 | 2.6310259754  | 7.0303725659  | 6.8098012815  |
| H64 | 2.2413845171  | 6.0604919195  | 6.5283480166  |
| C65 | 2.1526040643  | 7.8538435467  | 7.8701916815  |
| H66 | 1.3320975469  | 7.6220304683  | 8.5367725678  |
| C67 | 2.8969167592  | 9.0712915274  | 7.8564028853  |
| H68 | 2.7584334925  | 9.9202870521  | 8.5124439388  |
| C69 | 6.2276033712  | 9.4058488011  | 2.4038273862  |
| H70 | 5.3989003274  | 8.6874458769  | 2.4553214148  |
| H71 | 6.3127872604  | 9.7593319775  | 1.3680135111  |
| H72 | 7.1565986679  | 8.8855726973  | 2.6726719636  |
| C73 | 8.4487742181  | 14.0987555416 | 2.7759179614  |
| H74 | 9.2083046722  | 13.4651805632 | 2.2993172293  |
| H75 | 8.0264541672  | 14.7699531813 | 2.0176008440  |
| H76 | 8.9355047334  | 14.7047218281 | 3.5504881738  |
| X77 | 1.1652069999# | 9.6570340001# | 5.7153150001# |
| X78 | 2.6512790000# | 8.4138540000# | 7.5004090000# |
| H79 | 3.2433412543  | 11.5805150387 | 5.2633367075  |
| H80 | 5.3012696818  | 9.7795315281  | 5.6242124484  |
| H81 | -0.6251361762 | 14.0264942215 | 2.3667091593  |
| H82 | 6.7269073200  | 9.7307447430  | 10.7177493446 |

## Fe(III)

|     |              |               |               |
|-----|--------------|---------------|---------------|
| Zr1 | 6.1624743821 | 11.9572144510 | 3.9074276742  |
| Fe2 | 2.0421782849 | 8.7589212053  | 6.0340740038  |
| N3  | 2.5426023527 | 11.7893977885 | 5.3384301436  |
| N4  | 5.2286642808 | 9.1966245502  | 6.7078178095  |
| O5  | 4.4606827272 | 12.9552811425 | 3.8414571042  |
| O6  | 6.4487051919 | 11.4202492539 | 5.8136906412  |
| O7  | 5.9215388950 | 10.2811080118 | 2.9491471705  |
| O8  | 7.6299398891 | 12.9459287606 | 3.1655689174  |
| C9  | 3.2312097999 | 13.5334860503 | 3.7783242405  |
| C10 | 2.9580079586 | 14.6735490734 | 2.9880131863  |
| C11 | 1.6421559810 | 15.1545947028 | 3.0126810575  |
| H12 | 1.3855979533 | 16.0254026501 | 2.4213399158  |
| C13 | 0.6390844877 | 14.5617237232 | 3.7733170223  |
| C14 | 0.9224913985 | 13.4495790339 | 4.5526586784  |
| H15 | 0.1539225824 | 12.9896931989 | 5.1674886001  |
| C16 | 2.2139773325 | 12.9303836264 | 4.5506076567  |
| C17 | 4.0299006921 | 15.3617077873 | 2.1253985052  |
| C18 | 4.5790434471 | 14.3750149553 | 1.0751999124  |
| H19 | 3.7771243274 | 14.0274443551 | 0.4133861177  |
| H20 | 5.0400913435 | 13.4942539974 | 1.5312639786  |
| H21 | 5.3376116812 | 14.8668679475 | 0.4540255244  |
| C22 | 5.1641826905 | 15.8975659386 | 3.0209387358  |
| H23 | 5.9238639923 | 16.3984427231 | 2.4080858366  |
| H24 | 5.6581943400 | 15.1043640505 | 3.5865508622  |
| H25 | 4.7749950820 | 16.6298015352 | 3.7376838849  |
| C26 | 3.4621222067 | 16.5639224976 | 1.3507313903  |
| H27 | 4.2600912259 | 17.0119686516 | 0.7478138558  |
| H28 | 3.0818205282 | 17.3439450937 | 2.0198810722  |
| H29 | 2.6589030027 | 16.2725632191 | 0.6642618669  |
| C30 | 6.4670832909 | 11.2364977281 | 7.1469275602  |
| C31 | 7.1166262322 | 12.1184970299 | 8.0481151090  |
| C32 | 7.0281102005 | 11.8108873411 | 9.4113973101  |
| H33 | 7.5020349198 | 12.4684465854 | 10.1303379370 |
| C34 | 6.3725368500 | 10.6801810369 | 9.8963481286  |
| C35 | 5.7764716103 | 9.7997068902  | 9.0090418167  |
| H36 | 5.3195665220 | 8.8783678986  | 9.3591545138  |
| C37 | 5.8099659312 | 10.0892543607 | 7.6438138680  |
| C38 | 7.8894163340 | 13.3596192101 | 7.5699841987  |
| C39 | 6.9339999748 | 14.3493781063 | 6.8744658642  |
| H40 | 7.4917378383 | 15.2168687169 | 6.5018042118  |
| H41 | 6.1738305342 | 14.7133350265 | 7.5755308364  |
| H42 | 6.4033092826 | 13.9066068290 | 6.0266940255  |
| C43 | 9.0330321230 | 12.9334301442 | 6.6268611362  |
| H44 | 8.6723426450 | 12.4190849132 | 5.7336426839  |
| H45 | 9.7285527181 | 12.2625352730 | 7.1444193426  |
| H46 | 9.5987853942 | 13.8151701288 | 6.3021723250  |
| C47 | 8.5375467699 | 14.1210495526 | 8.7386258021  |
| H48 | 9.2551260732 | 13.5004264923 | 9.2874072775  |
| H49 | 7.7953375667 | 14.5063962882 | 9.4470049605  |

|     |               |               |               |
|-----|---------------|---------------|---------------|
| H50 | 9.0867907596  | 14.9833050394 | 8.3440995236  |
| C51 | 1.7356246313  | 10.6540000858 | 5.1565428928  |
| C52 | 1.8813251612  | 9.6269850786  | 4.1653579576  |
| H53 | 2.6502517052  | 9.5923619190  | 3.4040461505  |
| C54 | 0.8202787919  | 8.6870990854  | 4.3448829287  |
| H55 | 0.6540520144  | 7.7926798866  | 3.7574490792  |
| C56 | 0.0168097874  | 9.1294214755  | 5.4307040542  |
| H57 | -0.8453821648 | 8.6130516576  | 5.8338373397  |
| C58 | 0.5946574412  | 10.3169205678 | 5.9499642704  |
| H59 | 0.2579010270  | 10.8734210188 | 6.8155667241  |
| C60 | 4.1076276600  | 8.4817436596  | 6.9034028976  |
| C61 | 3.6196586461  | 7.4107904090  | 6.0720794644  |
| H62 | 4.1351321552  | 7.0000502392  | 5.2129242088  |
| C63 | 2.4401062379  | 6.8733046379  | 6.6760933196  |
| H64 | 1.8960560564  | 6.0040778427  | 6.3295093700  |
| C65 | 2.0992671768  | 7.7023920385  | 7.7809901872  |
| H66 | 1.2399685812  | 7.5872388667  | 8.4290795683  |
| C67 | 3.0672792184  | 8.7468583273  | 7.8633730519  |
| H68 | 3.0754766721  | 9.5546515413  | 8.5820843228  |
| C69 | 6.0429089746  | 9.3413237004  | 1.9136993118  |
| H70 | 5.2988350118  | 8.5444042041  | 2.0413128538  |
| H71 | 5.8784476387  | 9.8145325312  | 0.9381737668  |
| H72 | 7.0420790914  | 8.8892445783  | 1.9211913488  |
| C73 | 8.6699722967  | 13.6385628744 | 2.5263292561  |
| H74 | 9.4202524882  | 12.9297339564 | 2.1577782174  |
| H75 | 8.2729181884  | 14.2110863046 | 1.6807924705  |
| H76 | 9.1467707661  | 14.3280677771 | 3.2314189563  |
| X77 | 1.1371166003# | 9.6829265992# | 5.5807159998# |
| X78 | 2.7341582000# | 8.3574472000# | 7.6135586000# |
| H79 | 3.5287294691  | 11.5801565702 | 5.2332537132  |
| H80 | 5.7500650670  | 9.0370063318  | 5.8535894538  |
| H81 | -0.3644618979 | 14.9780130207 | 3.7642881657  |
| H82 | 6.3592849505  | 10.4742960013 | 10.9624961178 |

L4\_Y\_1c

Fe(II)

|     |               |              |              |
|-----|---------------|--------------|--------------|
| Y1  | 2.3121337467  | 4.1130712605 | 4.2399902613 |
| Fe2 | -0.2704362329 | 4.5059219301 | 7.3360438953 |
| O3  | 1.8264099699  | 4.6603115761 | 2.1649175092 |
| O4  | 3.0964907301  | 2.1539994705 | 3.7278596803 |
| O5  | 3.5087010018  | 5.5723488320 | 5.0280708728 |
| C6  | -0.8315896185 | 4.7676444458 | 5.3848909279 |
| C7  | -0.7626526506 | 6.0257146409 | 6.0655040964 |
| H8  | -0.1194528706 | 6.8502196511 | 5.7869497479 |
| C9  | -1.6748327706 | 5.9817704361 | 7.1585134665 |
| H10 | -1.8317915825 | 6.7696977151 | 7.8837397365 |
| C11 | -2.2992297442 | 4.6997678739 | 7.1675648753 |
| H12 | -3.0085462586 | 4.3424541667 | 7.9035429709 |
| C13 | -1.7829314890 | 3.9469287124 | 6.0723680888 |

|     |               |               |               |
|-----|---------------|---------------|---------------|
| H14 | -2.0220873323 | 2.9199733758  | 5.8261502086  |
| C15 | 1.4273679496  | 3.3608306132  | 7.3919234949  |
| C16 | 1.7053260007  | 4.6959999039  | 7.8289106695  |
| H17 | 2.4120674013  | 5.3651695133  | 7.3547423664  |
| C18 | 0.8846972330  | 4.9623811425  | 8.9625033701  |
| H19 | 0.8419628827  | 5.8972403526  | 9.5061067955  |
| C20 | 0.09244489617 | 3.8059394361  | 9.2243999779  |
| H21 | -0.6652536575 | 3.7140202129  | 9.9920691877  |
| C22 | 0.4203880528  | 2.8150108185  | 8.2553845910  |
| H23 | -0.0478504739 | 1.8450442628  | 8.1468422163  |
| C24 | -0.3942769428 | 3.8720812128  | 1.8345420806  |
| C25 | -1.3770826801 | 3.3721266701  | 0.9503952255  |
| H26 | -2.3188482559 | 3.0328554865  | 1.3807112312  |
| C27 | -1.1711557577 | 3.3106982098  | -0.4126688242 |
| C28 | 0.0375623875  | 3.8675486007  | -0.8842848601 |
| H29 | 0.1918734166  | 3.8895994438  | -1.9563501366 |
| C30 | 0.8787425947  | 4.3166196918  | 1.3398266922  |
| C31 | 2.9163312841  | 0.5690625530  | 5.4894268472  |
| C32 | 3.0923790488  | -0.7530350790 | 5.9520925215  |
| H33 | 2.7854372196  | -0.9762436828 | 6.9735659506  |
| C34 | 3.6227418246  | -1.7471003215 | 5.1530100106  |
| C35 | 3.9906449435  | -1.3634671663 | 3.8480608704  |
| H36 | 4.4092786678  | -2.1253417545 | 3.2021450136  |
| C37 | 3.2889408304  | 0.9340421552  | 4.1563023325  |
| C38 | 4.4397814528  | 6.5536139321  | 5.3371665673  |
| H39 | 4.1854687072  | 7.0637078258  | 6.2818609388  |
| H40 | 5.4507961383  | 6.1316600907  | 5.4550553465  |
| H41 | 4.4901166245  | 7.3255601158  | 4.5525871309  |
| C42 | 3.8487121781  | -0.0831234614 | 3.3202357407  |
| C43 | 1.0392839975  | 4.4011280322  | -0.0812975585 |
| C44 | -0.8100231842 | 4.0620125145  | 3.1915660444  |
| C45 | 2.3356705579  | 1.4806306903  | 6.4309660182  |
| N46 | 2.0335826833  | 2.7397528904  | 6.2823494338  |
| N47 | -0.1008657815 | 4.4586440433  | 4.2155524439  |
| C48 | 2.2721636832  | 5.0854755852  | -0.6935771637 |
| C49 | 2.1993880203  | 5.1489891136  | -2.2274257755 |
| H50 | 2.1982140434  | 4.1521775029  | -2.6857273540 |
| H51 | 1.3128477232  | 5.6915752856  | -2.5780581491 |
| H52 | 3.0808188005  | 5.6793707262  | -2.6068927939 |
| C53 | 2.3466386224  | 6.5367157602  | -0.1737971831 |
| H54 | 1.4521287431  | 7.0998396222  | -0.4678497792 |
| H55 | 2.4295655493  | 6.5639781741  | 0.9153281819  |
| H56 | 3.2208780593  | 7.0451883100  | -0.6005170986 |
| C57 | 3.5641880275  | 4.3326212137  | -0.3242389814 |
| H58 | 4.4339203202  | 4.8482650436  | -0.7525020447 |
| H59 | 3.6963049897  | 4.2742250309  | 0.7573014867  |
| H60 | 3.5467724294  | 3.3123073351  | -0.7242369182 |
| C61 | 4.2572547082  | 0.2183861079  | 1.8694156617  |
| C62 | 3.0146942822  | 0.6515417028  | 1.0658798546  |
| H63 | 2.5652727168  | 1.5570920073  | 1.4774829626  |
| H64 | 3.2895000950  | 0.8479558289  | 0.0216611370  |



|      |               |               |               |
|------|---------------|---------------|---------------|
| H65  | 2.2582112531  | -0.1434151222 | 1.0692579882  |
| C66  | 5.3298844411  | 1.3255841701  | 1.8409158170  |
| H67  | 4.9648311563  | 2.2448159740  | 2.3024161076  |
| H68  | 6.2314544529  | 1.0034520879  | 2.3768799993  |
| H69  | 5.6150669779  | 1.5491127509  | 0.8049304890  |
| C70  | 4.8517428279  | -1.0097798543 | 1.1609311456  |
| H71  | 5.1401130368  | -0.7296811389 | 0.1406968950  |
| H72  | 5.7515720268  | -1.3851471294 | 1.6640095511  |
| H73  | 4.1314593775  | -1.8333791406 | 1.0802303117  |
| H76  | -1.8841907262 | 3.9138054231  | 3.3596468474  |
| H77  | 2.1282340970  | 1.0347669429  | 7.4116156979  |
| C80  | -2.2286793343 | 2.7027383189  | -1.3460661891 |
| C83  | -2.4758640256 | 1.2350072916  | -0.9478345780 |
| H84  | -2.8313090114 | 1.1500501819  | 0.0856979263  |
| H85  | -3.2332095493 | 0.7800212023  | -1.6002259990 |
| H86  | -1.5545065247 | 0.6463689994  | -1.0332774279 |
| C86  | -3.5473449470 | 3.4911093529  | -1.2267555222 |
| H87  | -3.9434817761 | 3.4710842923  | -0.2047239204 |
| H88  | -3.4031080576 | 4.5408977610  | -1.5092013318 |
| H89  | -4.3129994776 | 3.0627026390  | -1.8873027917 |
| C89  | -1.7909424569 | 2.7271613557  | -2.8179930693 |
| H90  | -2.5684280462 | 2.2684195457  | -3.4415039229 |
| H91  | -1.6371532974 | 3.7497090268  | -3.1841819035 |
| H92  | -0.8644032383 | 2.1622359469  | -2.9777859187 |
| C92  | 3.7750629345  | -3.1845538740 | 5.6730684467  |
| C95  | 2.3845885983  | -3.7524539101 | 6.0178290980  |
| H96  | 1.8808255426  | -3.1535426748 | 6.7856455412  |
| H97  | 1.7391711431  | -3.7699120993 | 5.1311303541  |
| H98  | 2.4693764055  | -4.7795509943 | 6.3975462911  |
| C98  | 4.6558591214  | -3.1903786826 | 6.9366354560  |
| H99  | 4.2242023699  | -2.5783861579 | 7.7370400332  |
| H100 | 4.7681878018  | -4.2120175348 | 7.3234024967  |
| H101 | 5.6558900981  | -2.7971213155 | 6.7176464708  |
| C101 | 4.4233555305  | -4.1146842011 | 4.6378101738  |
| H102 | 4.5174836784  | -5.1240503963 | 5.0573481551  |
| H103 | 3.8218074955  | -4.1937915367 | 3.7238936701  |
| H104 | 5.4293357860  | -3.7781885924 | 4.3584816299  |

Fe(III)

|     |               |              |              |
|-----|---------------|--------------|--------------|
| Y1  | 2.3187858589  | 4.0946825017 | 4.2094523611 |
| Fe2 | -0.2574628345 | 4.5462663039 | 7.3724110805 |
| O3  | 1.8013587561  | 4.6469533810 | 2.1677948263 |
| O4  | 3.0977718807  | 2.1248897760 | 3.7530338102 |
| O5  | 3.3754644362  | 5.5881569573 | 5.1058906862 |
| C6  | -0.8712153581 | 4.8381494694 | 5.3154362088 |
| C7  | -0.7234776383 | 6.0751627778 | 6.0186735545 |
| H8  | -0.0455757487 | 6.8692215209 | 5.7316256090 |
| C9  | -1.6203082655 | 6.0758474740 | 7.1268651443 |
| H10 | -1.7532779691 | 6.8856768882 | 7.8330133089 |
| C11 | -2.2920367943 | 4.8176452690 | 7.1495987232 |

|     |               |               |               |
|-----|---------------|---------------|---------------|
| H12 | -3.0265662354 | 4.4970161755  | 7.8777784579  |
| C13 | -1.8149377143 | 4.0460648656  | 6.0472841665  |
| H14 | -2.0963409150 | 3.0276323195  | 5.8092807706  |
| C15 | 1.5045591180  | 3.3092515761  | 7.4266136531  |
| C16 | 1.7600968453  | 4.6660080752  | 7.8161937401  |
| H17 | 2.4538312242  | 5.3216866002  | 7.3018145761  |
| C18 | 0.9673973202  | 4.9557266195  | 8.9686459367  |
| H19 | 0.9588937197  | 5.8914741492  | 9.5126691271  |
| C20 | 0.1817927808  | 3.8038419956  | 9.2664940346  |
| H21 | -0.5480756428 | 3.7150116373  | 10.0616773211 |
| C22 | 0.4895758143  | 2.8015414480  | 8.3048737274  |
| H23 | 0.0091611206  | 1.8346186477  | 8.2204409285  |
| C24 | -0.3964086356 | 3.8078849319  | 1.8371758724  |
| C25 | -1.3719444216 | 3.2874012970  | 0.9414790960  |
| H26 | -2.3044426861 | 2.9173603030  | 1.3645764738  |
| C27 | -1.1610189421 | 3.2514318379  | -0.4161011684 |
| C28 | 0.0393643963  | 3.8490105932  | -0.8806436140 |
| H29 | 0.1895634122  | 3.8868862146  | -1.9522110711 |
| C30 | 0.8689560793  | 4.2913863701  | 1.3373110343  |
| C31 | 2.8387846567  | 0.5138085510  | 5.4750392954  |
| C32 | 2.9899797072  | -0.8256445693 | 5.9255234765  |
| H33 | 2.6667612841  | -1.0608978210 | 6.9384235748  |
| C34 | 3.5169734374  | -1.8067801882 | 5.1208914000  |
| C35 | 3.9179753834  | -1.4016718122 | 3.8235803675  |
| H36 | 4.3393822270  | -2.1615152611 | 3.1781187418  |
| C37 | 3.2507018496  | 0.8945307741  | 4.1485303127  |
| C38 | 4.3203678172  | 6.5709130310  | 5.4108856882  |
| H39 | 4.0883023809  | 7.0580226108  | 6.3716780595  |
| H40 | 5.3300994420  | 6.1436766697  | 5.4916094051  |
| H41 | 4.3421192961  | 7.3544346587  | 4.6402707405  |
| C42 | 3.8168538274  | -0.1152464044 | 3.3079832903  |
| C43 | 1.0296577269  | 4.4009436508  | -0.0805189793 |
| C44 | -0.8174696221 | 4.0057627279  | 3.1724785761  |
| C45 | 2.2958077732  | 1.4146607842  | 6.4167208510  |
| N46 | 2.0369845117  | 2.7071660613  | 6.2986059008  |
| N47 | -0.1226215774 | 4.4786379863  | 4.2004494323  |
| C48 | 2.2461767047  | 5.1179778493  | -0.6883766038 |
| C49 | 2.1649154741  | 5.1894681298  | -2.2213584052 |
| H50 | 2.1877834222  | 4.1969270241  | -2.6877376051 |
| H51 | 1.2660692213  | 5.7150448019  | -2.5655770156 |
| H52 | 3.0314853053  | 5.7430247383  | -2.5998453978 |
| C53 | 2.2891543115  | 6.5669975592  | -0.1588213484 |
| H54 | 1.3802446537  | 7.1117342376  | -0.4416847119 |
| H55 | 2.3854279945  | 6.5964980909  | 0.9293674522  |
| H56 | 3.1458980749  | 7.0967749991  | -0.5926302574 |
| C57 | 3.5549104339  | 4.3887928893  | -0.3304051439 |
| H58 | 4.4082222345  | 4.9238159506  | -0.7652360757 |
| H59 | 3.7044205164  | 4.3299125260  | 0.7493542743  |
| H60 | 3.5565960337  | 3.3704524380  | -0.7349662890 |
| C61 | 4.2759038106  | 0.1991753676  | 1.8754760129  |
| C62 | 3.0671743770  | 0.6697986346  | 1.0421876615  |

|      |               |               |               |
|------|---------------|---------------|---------------|
| H63  | 2.6279976534  | 1.5852669373  | 1.4439714929  |
| H64  | 3.3790555064  | 0.8658818169  | 0.0092779636  |
| H65  | 2.2909154432  | -0.1049621553 | 1.0146439071  |
| C66  | 5.3748664126  | 1.2806459010  | 1.8959552870  |
| H67  | 5.0202402059  | 2.2099786058  | 2.3459838780  |
| H68  | 6.2489687940  | 0.9350343081  | 2.4609883447  |
| H69  | 5.7030404517  | 1.4999123647  | 0.8727518418  |
| C70  | 4.8631118071  | -1.0342219796 | 1.1704384165  |
| H71  | 5.1844078345  | -0.7499964563 | 0.1620881284  |
| H72  | 5.7421897205  | -1.4326817002 | 1.6911997722  |
| H73  | 4.1286601789  | -1.8413025086 | 1.0593396888  |
| H76  | -1.8851889332 | 3.8226627308  | 3.3412732267  |
| H77  | 2.0986670839  | 0.9651448907  | 7.3969041953  |
| C80  | -2.2020533653 | 2.6360142636  | -1.3661797726 |
| C83  | -2.4365272121 | 1.1628923917  | -0.9747840604 |
| H84  | -2.8052688396 | 1.0673648070  | 0.0535385379  |
| H85  | -3.1818054897 | 0.7058696620  | -1.6379829262 |
| H86  | -1.5102934501 | 0.5806774947  | -1.0545873792 |
| C86  | -3.5277546241 | 3.4155255491  | -1.2532057729 |
| H87  | -3.9370638161 | 3.3817735019  | -0.2364096732 |
| H88  | -3.3909993369 | 4.4689026746  | -1.5258105486 |
| H89  | -4.2809219346 | 2.9868523066  | -1.9262386285 |
| C89  | -1.7485702735 | 2.6727103610  | -2.8331365718 |
| H90  | -2.5167298621 | 2.2127838190  | -3.4659968831 |
| H91  | -1.6008823416 | 3.6979205714  | -3.1942175344 |
| H92  | -0.8182877662 | 2.1128928005  | -2.9899094541 |
| C92  | 3.6468772509  | -3.2562407154 | 5.6176901180  |
| C95  | 2.2458766608  | -3.7937666175 | 5.9734413884  |
| H96  | 1.7698999058  | -3.1977415309 | 6.7615403671  |
| H97  | 1.5848124992  | -3.7827343053 | 5.0981059523  |
| H98  | 2.3128548212  | -4.8280513541 | 6.3337963752  |
| C98  | 4.5461500354  | -3.2925555151 | 6.8699915363  |
| H99  | 4.1349041446  | -2.6896305419 | 7.6883014239  |
| H100 | 4.6459649289  | -4.3213699396 | 7.2377738422  |
| H101 | 5.5507302312  | -2.9141248164 | 6.6461675392  |
| C101 | 4.2618807542  | -4.1844962040 | 4.5598108904  |
| H102 | 4.3429910550  | -5.1997331374 | 4.9656164541  |
| H103 | 3.6449482618  | -4.2453084404 | 3.6547150964  |
| H104 | 5.2710643908  | -3.8665594468 | 4.2704895565  |

L4\_Zr\_1c

Fe(II)

|     |              |               |              |
|-----|--------------|---------------|--------------|
| Zr1 | 5.0232051572 | 11.1555262632 | 4.3493071581 |
| Fe2 | 2.2179973471 | 8.4043087228  | 5.6177194183 |
| N3  | 2.6685587303 | 11.4081349003 | 4.7926391800 |
| N4  | 5.0238531099 | 9.4952925972  | 6.0289258441 |
| O5  | 4.5290162340 | 12.9492890632 | 3.4139181930 |
| O6  | 5.3591809240 | 12.2495815665 | 6.1836875094 |
| O7  | 4.6080211211 | 9.8802763184  | 2.8844446710 |

|     |               |               |               |
|-----|---------------|---------------|---------------|
| O8  | 6.9471406664  | 11.1642354842 | 4.0325885055  |
| C9  | 3.7391760141  | 13.9753579220 | 3.6170303943  |
| C10 | 3.9619080419  | 15.2274994773 | 2.9620431029  |
| C11 | 3.1374300635  | 16.2895197857 | 3.3116865515  |
| H12 | 3.3265799681  | 17.2498098612 | 2.8425842154  |
| C13 | 2.0572370687  | 16.2147057663 | 4.2197650059  |
| C14 | 1.7882740623  | 14.9703140574 | 4.7494929889  |
| H15 | 0.9341037432  | 14.8179310193 | 5.4042800164  |
| C16 | 2.5993511039  | 13.8491809201 | 4.4610523757  |
| C17 | 5.0414115906  | 15.3745408775 | 1.8769073157  |
| C18 | 4.7347200725  | 14.3859802219 | 0.7314311126  |
| H19 | 3.7539142962  | 14.5982089904 | 0.2879411445  |
| H20 | 4.7367486206  | 13.3525737986 | 1.0861409593  |
| H21 | 5.4901447781  | 14.4808521798 | -0.0594058559 |
| C22 | 6.4463339492  | 15.0956704058 | 2.4449209647  |
| H23 | 7.1946090119  | 15.1951261029 | 1.6474633528  |
| H24 | 6.5190216419  | 14.0892445301 | 2.8607213291  |
| H25 | 6.6982648877  | 15.8149517619 | 3.2329899159  |
| C26 | 5.0627992451  | 16.7875609694 | 1.2731539612  |
| H27 | 5.8298460919  | 16.8322895661 | 0.4909217772  |
| H28 | 5.3127303817  | 17.5528504542 | 2.0185227524  |
| H29 | 4.1056940921  | 17.0556444332 | 0.8089111373  |
| C30 | 2.1017160526  | 12.5752612067 | 4.8950539960  |
| C31 | 6.1639070539  | 12.0487055375 | 7.1881388663  |
| C32 | 6.7045655227  | 13.1308618608 | 7.9641966652  |
| C33 | 7.5974192006  | 12.8173363697 | 8.9781895915  |
| H34 | 8.0286649350  | 13.6395184540 | 9.5404690878  |
| C35 | 7.9841069317  | 11.5068435158 | 9.3513304131  |
| C36 | 7.3912569532  | 10.4766932134 | 8.6584628869  |
| H37 | 7.5954586066  | 9.4408176577  | 8.9157766191  |
| C38 | 6.4959608276  | 10.7178026715 | 7.5893526071  |
| C39 | 6.3077582941  | 14.5864930988 | 7.6733959068  |
| C40 | 4.7810669469  | 14.7418446551 | 7.8282129225  |
| H41 | 4.4846661912  | 15.7766268770 | 7.6135171684  |
| H42 | 4.4702917652  | 14.5068363121 | 8.8542224863  |
| H43 | 4.2446980707  | 14.0835455798 | 7.1421506170  |
| C44 | 6.7331491166  | 14.9752722122 | 6.2449685938  |
| H45 | 6.2569555325  | 14.3364441920 | 5.5000211672  |
| H46 | 7.8211860791  | 14.8939275723 | 6.1278603014  |
| H47 | 6.4485922447  | 16.0151803836 | 6.0381283641  |
| C48 | 6.9731384868  | 15.5789713444 | 8.6400483478  |
| H49 | 8.0673451161  | 15.5672176728 | 8.5599955494  |
| H50 | 6.7002404615  | 15.3877385345 | 9.6852191868  |
| H51 | 6.6402654990  | 16.5946143251 | 8.3951893423  |
| C52 | 5.8003334193  | 9.5818617558  | 7.0793211296  |
| C53 | 1.7972881436  | 10.3166776917 | 5.0478766337  |
| C54 | 1.3613864644  | 9.3868989734  | 4.0515476639  |
| H55 | 1.7322692680  | 9.3553386749  | 3.0364214434  |
| C56 | 0.4156948362  | 8.5104893701  | 4.6576880980  |
| H57 | -0.0723678254 | 7.6743316847  | 4.1735356191  |
| C58 | 0.2710579567  | 8.8860825312  | 6.0263290811  |

|      |               |               |               |
|------|---------------|---------------|---------------|
| H59  | -0.3457845392 | 8.3861934965  | 6.7625874897  |
| C60  | 1.1205570198  | 10.0055283039 | 6.2706809448  |
| H61  | 1.2703332022  | 10.5114193142 | 7.2160650272  |
| C62  | 4.2058803754  | 8.3430303838  | 6.0021540336  |
| C63  | 3.8961677308  | 7.5343572403  | 4.8633570892  |
| H64  | 4.2571668420  | 7.7130794391  | 3.8624904584  |
| C65  | 2.9762927580  | 6.5306175514  | 5.2805379066  |
| H66  | 2.5220423933  | 5.7859625843  | 4.6391071361  |
| C67  | 2.7088068693  | 6.7125051426  | 6.6697971727  |
| H68  | 2.0161190990  | 6.1331057530  | 7.2664820398  |
| C69  | 3.4685130014  | 7.8281265630  | 7.1221912191  |
| H70  | 3.4475750819  | 8.2624639083  | 8.1137735321  |
| C71  | 5.0586018531  | 9.2266867928  | 1.7432137817  |
| H72  | 4.8453412666  | 8.1458490885  | 1.7906942521  |
| H73  | 4.5571033847  | 9.6213124988  | 0.8468060657  |
| H74  | 6.1443371997  | 9.3504660767  | 1.6121759010  |
| C75  | 8.3177206637  | 11.3695674887 | 3.9522117572  |
| H76  | 8.8504414564  | 10.4084777127 | 3.9101646797  |
| H77  | 8.5713307724  | 11.9400809680 | 3.0471427606  |
| H78  | 8.6835931442  | 11.9277757259 | 4.8254545880  |
| H81  | 1.0783643473  | 12.5998096188 | 5.2886341659  |
| H82  | 5.8891189656  | 8.6784658644  | 7.6928830716  |
| C85  | 1.2330054147  | 17.4703704308 | 4.5346899165  |
| C88  | 0.1231373831  | 17.1892385951 | 5.5573127905  |
| H89  | -0.5930738672 | 16.4446692593 | 5.1883472822  |
| H90  | 0.5301838345  | 16.8320755683 | 6.5109925680  |
| H91  | -0.4365406589 | 18.1102334117 | 5.7606748479  |
| C91  | 2.1583407696  | 18.5577900144 | 5.1180058389  |
| H92  | 2.6263325481  | 18.2159410852 | 6.0490386160  |
| H93  | 2.9605042648  | 18.8275040012 | 4.4214860422  |
| H94  | 1.5887170110  | 19.4702222616 | 5.3381858758  |
| C94  | 0.5719923655  | 17.9987340988 | 3.2453375045  |
| H95  | -0.0180712338 | 18.8998508661 | 3.4578093598  |
| H96  | 1.3135915381  | 18.2615745518 | 2.4825698588  |
| H97  | -0.0994859876 | 17.2471704726 | 2.8129412375  |
| C97  | 8.9883668613  | 11.2962816142 | 10.4918123578 |
| C100 | 8.4377251177  | 11.9172916845 | 11.7912604427 |
| H101 | 8.2555480002  | 12.9927770033 | 11.6853370139 |
| H102 | 7.4905873723  | 11.4453514356 | 12.0796347683 |
| H103 | 9.1507222520  | 11.7809818705 | 12.6148755020 |
| C103 | 10.3269453473 | 11.9696742055 | 10.1271976474 |
| H104 | 10.2091367791 | 13.0459811047 | 9.9575559054  |
| H105 | 11.0576453767 | 11.8381238772 | 10.9359748665 |
| H106 | 10.7480434209 | 11.5322281393 | 9.2139112279  |
| C106 | 9.2591014541  | 9.8073932341  | 10.7523195046 |
| H107 | 9.9884527597  | 9.6977469661  | 11.5638720381 |
| H108 | 8.3487311588  | 9.2752432327  | 11.0541080773 |
| H109 | 9.6718382901  | 9.3091141366  | 9.8668852481  |

Fe(III)

|     |              |               |               |
|-----|--------------|---------------|---------------|
| Zr1 | 5.0748720022 | 11.1971183156 | 4.4113168520  |
| Fe2 | 2.2365896695 | 8.3751175376  | 5.5356837598  |
| N3  | 2.6801424219 | 11.4201444288 | 4.8513314968  |
| N4  | 5.0173894298 | 9.5057290280  | 6.1271420903  |
| O5  | 4.5318269929 | 12.9664428207 | 3.5044446595  |
| O6  | 5.4133071656 | 12.2446426409 | 6.2519895874  |
| O7  | 4.4995836147 | 9.8520511444  | 3.0386995271  |
| O8  | 6.9569190979 | 11.1316052728 | 3.9880952340  |
| C9  | 3.7392400079 | 13.9919934090 | 3.7084763216  |
| C10 | 3.9321597686 | 15.2291375555 | 3.0226807410  |
| C11 | 3.1047905096 | 16.2861280650 | 3.3798942641  |
| H12 | 3.2716359327 | 17.2390847636 | 2.8892386906  |
| C13 | 2.0444070408 | 16.2216742199 | 4.3168795077  |
| C14 | 1.7990339745 | 14.9894996195 | 4.8769928268  |
| H15 | 0.9617587476 | 14.8425329437 | 5.5535572801  |
| C16 | 2.6173888315 | 13.8670992345 | 4.5847752115  |
| C17 | 4.9751032413 | 15.3713698413 | 1.9011362896  |
| C18 | 4.6418511924 | 14.3627829972 | 0.7806690148  |
| H19 | 3.6445629602 | 14.5560706274 | 0.3670079379  |
| H20 | 4.6713119519 | 13.3322651259 | 1.1431771696  |
| H21 | 5.3677095736 | 14.4591907026 | -0.0360280675 |
| C22 | 6.4002314671 | 15.1202087893 | 2.4292283627  |
| H23 | 7.1204819498 | 15.2252144162 | 1.6082858697  |
| H24 | 6.5071717934 | 14.1188930475 | 2.8505305948  |
| H25 | 6.6655756312 | 15.8513792931 | 3.2012972296  |
| C26 | 4.9579822596 | 16.7753667532 | 1.2760532508  |
| H27 | 5.7062947763 | 16.8204995900 | 0.4768621404  |
| H28 | 5.2121066815 | 17.5569751713 | 2.0024043824  |
| H29 | 3.9879916946 | 17.0194281700 | 0.8262992477  |
| C30 | 2.1244874737 | 12.6024221363 | 5.0067411749  |
| C31 | 6.1186146045 | 12.0648279447 | 7.3295582747  |
| C32 | 6.6530380259 | 13.1558345138 | 8.0920847269  |
| C33 | 7.4333702222 | 12.8399274037 | 9.1927043571  |
| H34 | 7.8637547742 | 13.6646338787 | 9.7508757812  |
| C35 | 7.7164803888 | 11.5289352190 | 9.6642902320  |
| C36 | 7.1391079729 | 10.4963619632 | 8.9713732481  |
| H37 | 7.2786063677 | 9.4655073983  | 9.2850797138  |
| C38 | 6.3478063886 | 10.7338759737 | 7.8126616313  |
| C39 | 6.3809973407 | 14.6156663060 | 7.6996042372  |
| C40 | 4.8616632165 | 14.8799473972 | 7.7238261749  |
| H41 | 4.6595700517 | 15.9206219400 | 7.4423657984  |
| H42 | 4.4552155816 | 14.7200592830 | 8.7303647724  |
| H43 | 4.3285190543 | 14.2307524035 | 7.0262455469  |
| C44 | 6.9489114945 | 14.8984701508 | 6.2955195259  |
| H45 | 6.4858549461 | 14.2657971952 | 5.5367760502  |
| H46 | 8.0328374994 | 14.7317518406 | 6.2727616472  |
| H47 | 6.7661111493 | 15.9455789166 | 6.0244889593  |
| C48 | 7.0369617961 | 15.6078833682 | 8.6716988496  |
| H49 | 8.1305733377 | 15.5246517256 | 8.6775933492  |
| H50 | 6.6722590006 | 15.4865939888 | 9.6989855042  |
| H51 | 6.7923962626 | 16.6291059092 | 8.3583737051  |

|      |               |               |               |
|------|---------------|---------------|---------------|
| C52  | 5.7058225319  | 9.6111594211  | 7.2563174497  |
| C53  | 1.7902451099  | 10.3503442908 | 5.0000275051  |
| C54  | 1.3976565060  | 9.4736947955  | 3.9368585057  |
| H55  | 1.8286122647  | 9.4940124879  | 2.9446776999  |
| C56  | 0.4157106739  | 8.5787855248  | 4.4324165928  |
| H57  | -0.0517108569 | 7.7788694010  | 3.8713422021  |
| C58  | 0.2148686206  | 8.8536228157  | 5.8116692393  |
| H59  | -0.4472657713 | 8.3139400426  | 6.4776770618  |
| C60  | 1.0677967850  | 9.9417860559  | 6.1756235301  |
| H61  | 1.1537067728  | 10.3931707497 | 7.1561308459  |
| C62  | 4.2740690517  | 8.3324667411  | 6.0265726557  |
| C63  | 4.0724986273  | 7.5443721814  | 4.8529695428  |
| H64  | 4.4853270831  | 7.7840396137  | 3.8847280233  |
| C65  | 3.1674283237  | 6.4989972107  | 5.1630065714  |
| H66  | 2.7962408063  | 5.7611940387  | 4.4623735554  |
| C67  | 2.7786718824  | 6.6238172728  | 6.5255016508  |
| H68  | 2.0799180910  | 5.9850341158  | 7.0507123423  |
| C69  | 3.4465219543  | 7.7630592250  | 7.0664136718  |
| H70  | 3.3498898371  | 8.1456841092  | 8.0749431538  |
| C71  | 4.9528095870  | 9.3401482928  | 1.8152105688  |
| H72  | 4.8476098798  | 8.2427464292  | 1.7806084505  |
| H73  | 4.3648920515  | 9.7533745896  | 0.9837288593  |
| H74  | 6.0107373790  | 9.5809997448  | 1.6422905775  |
| C75  | 8.3312501868  | 11.2196521158 | 3.7561761434  |
| H76  | 8.7433273930  | 10.2280235677 | 3.5295586970  |
| H77  | 8.5306930118  | 11.8837337705 | 2.9060356326  |
| H78  | 8.8420968039  | 11.6187697070 | 4.6411856451  |
| H81  | 1.1081397265  | 12.6283647919 | 5.4178662479  |
| H82  | 5.7860610927  | 8.6995147392  | 7.8577579046  |
| C85  | 8.6161576375  | 11.3339428968 | 10.8905287007 |
| C88  | 10.0087624802 | 11.9279321180 | 10.5935018008 |
| H89  | 9.9575968482  | 12.9987094545 | 10.3643777212 |
| H90  | 10.6676980346 | 11.8073336403 | 11.4621037891 |
| H91  | 10.4777141850 | 11.4244607564 | 9.7396004772  |
| C91  | 7.9965720429  | 12.0504622612 | 12.1076658467 |
| H92  | 7.8855187888  | 13.1279216709 | 11.9411950123 |
| H93  | 7.0055973610  | 11.6435657995 | 12.3427878498 |
| H94  | 8.6343980533  | 11.9189902923 | 12.9901673547 |
| C94  | 8.7897453161  | 9.8492996208  | 11.2435662106 |
| H95  | 9.4387773139  | 9.7506414031  | 12.1209863093 |
| H96  | 7.8323861267  | 9.3730751702  | 11.4900196792 |
| H97  | 9.2573743269  | 9.2866085587  | 10.4261714736 |
| C97  | 1.2134331927  | 17.4763083588 | 4.6162774162  |
| C100 | 0.1235463555  | 17.2096567461 | 5.6641989342  |
| H101 | -0.5929634093 | 16.4505132022 | 5.3261105695  |
| H102 | 0.5489307329  | 16.8844638402 | 6.6214705032  |
| H103 | -0.4420614445 | 18.1293784372 | 5.8524921418  |
| C103 | 2.1424261217  | 18.5831162492 | 5.1557001217  |
| H104 | 2.6266746694  | 18.2720718570 | 6.0890992162  |
| H105 | 2.9305546384  | 18.8425124602 | 4.4393792759  |
| H106 | 1.5683742714  | 19.4953829809 | 5.3592167058  |

|      |               |               |              |
|------|---------------|---------------|--------------|
| C106 | 0.5291055311  | 17.9643799005 | 3.3227028883 |
| H107 | -0.0698852447 | 18.8607544617 | 3.5251737399 |
| H108 | 1.2556010166  | 18.2238930036 | 2.5444374794 |
| H109 | -0.1388485370 | 17.1958287513 | 2.9153492970 |

L5\_Y\_c

Fe(II)

|     |               |               |               |
|-----|---------------|---------------|---------------|
| Y1  | 0.3033849334  | 16.7508161629 | 4.9574767243  |
| Fe2 | 2.2219200848  | 12.9732761975 | 7.1558315858  |
| S3  | -0.8762554150 | 14.6321180423 | 6.4743831293  |
| S4  | 3.1712374780  | 16.0139479055 | 5.6346731940  |
| O5  | 0.4398572477  | 17.5281023258 | 6.9486314010  |
| O6  | 1.1393327211  | 15.7048267086 | 3.2911726568  |
| O7  | -1.2451029694 | 17.7982723597 | 4.1805382715  |
| C8  | 0.2023157281  | 13.2745336972 | 6.8321951409  |
| C9  | 0.4180755927  | 12.6370193385 | 8.0916392654  |
| H10 | 0.1498364907  | 13.0362170679 | 9.0592539466  |
| C11 | 1.0960475291  | 11.4092416685 | 7.8433227546  |
| H12 | 1.4403534297  | 10.7167640904 | 8.6008793713  |
| C13 | 1.3048544910  | 11.2902566419 | 6.4395004263  |
| H14 | 1.8314077745  | 10.4888356985 | 5.9378207584  |
| C15 | 0.7652850623  | 12.4472904569 | 5.8086899221  |
| H16 | 0.7893639573  | 12.6709680757 | 4.7494402894  |
| C17 | 3.4380537434  | 14.5615392872 | 6.6108875500  |
| C18 | 4.0126065955  | 13.3168802097 | 6.2094408063  |
| H19 | 4.2216783089  | 13.0136406496 | 5.1938470082  |
| C20 | 4.2038260471  | 12.5310713174 | 7.3834284062  |
| H21 | 4.5905485976  | 11.5198173605 | 7.4066949248  |
| C22 | 3.7339934395  | 13.2782901931 | 8.5007617233  |
| H23 | 3.7006872020  | 12.9383135544 | 9.5279120469  |
| C24 | 3.2502028257  | 14.5312660024 | 8.0283940239  |
| H25 | 2.8114906535  | 15.3193227175 | 8.6264499730  |
| C26 | -1.1757498396 | 15.5447301425 | 8.0626829335  |
| H27 | -1.8810013678 | 16.3086681839 | 7.7097446382  |
| H28 | -1.7322925769 | 14.8528353518 | 8.7022798562  |
| C29 | -0.0404294139 | 16.1711039333 | 8.8102722582  |
| C30 | 0.1983966080  | 15.7780258148 | 10.1234954024 |
| H31 | -0.4014533808 | 14.9678826428 | 10.5377848408 |
| C32 | 1.1535497270  | 16.4161623438 | 10.9214896059 |
| C33 | 1.8274694967  | 17.4879995109 | 10.3331723406 |
| H34 | 2.5546462884  | 18.0230653753 | 10.9352109450 |
| C35 | 1.6298554304  | 17.9402063545 | 9.0172705291  |
| C36 | 0.6901027011  | 17.2398567161 | 8.2158815251  |
| C37 | 3.8598400747  | 15.6417770460 | 3.9672101627  |
| H38 | 3.7841094552  | 16.6307516046 | 3.4942409714  |
| H39 | 4.9252573263  | 15.4300657860 | 4.1033116643  |
| C40 | 3.2120918554  | 14.5931346895 | 3.1121762204  |
| C41 | 4.0019735520  | 13.5712480779 | 2.5943689532  |
| H42 | 5.0546895971  | 13.5404817378 | 2.8760011714  |



|     |               |               |               |
|-----|---------------|---------------|---------------|
| C43 | 3.4855774253  | 12.6119088342 | 1.7182174863  |
| C44 | 2.1371702591  | 12.7448498459 | 1.3857088135  |
| H45 | 1.7137473257  | 12.0297633950 | 0.6893750879  |
| C46 | 1.2834919389  | 13.7479147201 | 1.8747294040  |
| C47 | 1.8375698220  | 14.7047923480 | 2.7675714324  |
| C48 | -2.2672739384 | 18.5734930797 | 3.6495966029  |
| H49 | -3.0747823295 | 17.9425977772 | 3.2472964551  |
| H50 | -2.7059182714 | 19.2365082551 | 4.4120031313  |
| H51 | -1.9004286466 | 19.2065970743 | 2.8264992521  |
| C54 | 2.4311625657  | 19.1920812404 | 8.5919312414  |
| C55 | 2.0361055522  | 20.3632594340 | 9.5187203952  |
| H56 | 2.2345203606  | 20.1443414156 | 10.5734152730 |
| H57 | 2.6033996348  | 21.2649941197 | 9.2537420287  |
| H58 | 0.9685233951  | 20.5936156753 | 9.4206458798  |
| C59 | 2.1998781692  | 19.6738608723 | 7.1496964966  |
| H60 | 1.1480114493  | 19.8892284725 | 6.9485039389  |
| H61 | 2.7776913747  | 20.5949196063 | 6.9949477324  |
| H62 | 2.5495208977  | 18.9386626692 | 6.4184270239  |
| C63 | 3.9422934241  | 18.9154066791 | 8.7377255449  |
| H64 | 4.5189473370  | 19.8047053845 | 8.4517646733  |
| H65 | 4.2240037234  | 18.6571123280 | 9.7643909479  |
| H66 | 4.2507435568  | 18.0892849428 | 8.0863584811  |
| C67 | 1.3858307838  | 15.9622509357 | 12.3697820209 |
| C68 | 2.4930123546  | 16.7670225366 | 13.0647143488 |
| H69 | 3.4533248366  | 16.6738904609 | 12.5434263406 |
| H70 | 2.2420161705  | 17.8321120334 | 13.1337179540 |
| H71 | 2.6341013766  | 16.3962733953 | 14.0872846545 |
| C72 | 0.0858338007  | 16.1398240154 | 13.1789140721 |
| H73 | -0.2268134523 | 17.1904645500 | 13.1889285634 |
| H74 | -0.7376981841 | 15.5511587567 | 12.7589866040 |
| H75 | 0.2296856327  | 15.8168211571 | 14.2183185059 |
| C76 | 1.7949810122  | 14.4761136580 | 12.3913324438 |
| H77 | 1.9520319599  | 14.1336569564 | 13.4224925554 |
| H78 | 1.0272329096  | 13.8350171469 | 11.9431271901 |
| H79 | 2.7281357816  | 14.3199870065 | 11.8367760786 |
| C80 | -0.1609561436 | 13.7592442805 | 1.3206845560  |
| C81 | -1.1477634355 | 14.6857858720 | 2.0499817218  |
| H82 | -1.2623196981 | 14.4102633555 | 3.1050886531  |
| H83 | -0.8547750866 | 15.7350112108 | 2.0004857160  |
| H84 | -2.1350476906 | 14.5824847627 | 1.5800724483  |
| C85 | -0.1008642996 | 14.2125797624 | -0.1535607980 |
| H86 | 0.3058870504  | 15.2277020132 | -0.2314021320 |
| H87 | 0.5337518703  | 13.5506965082 | -0.7540230984 |
| H88 | -1.1052028568 | 14.2135739713 | -0.5977674319 |
| C89 | -0.7705191883 | 12.3418802875 | 1.3858522964  |
| H90 | -1.8008592076 | 12.3640430338 | 1.0095838199  |
| H91 | -0.2242018005 | 11.6088611623 | 0.7836951114  |
| H92 | -0.7988765522 | 11.9729299374 | 2.4182910603  |
| C93 | 4.3863395840  | 11.4936139480 | 1.1732536534  |
| C94 | 3.6348433313  | 10.5471409482 | 0.2272952816  |
| H95 | 2.8014781964  | 10.0448428713 | 0.7325796889  |

|      |              |               |               |
|------|--------------|---------------|---------------|
| H96  | 3.2379804812 | 11.0748269477 | -0.6481590885 |
| H97  | 4.3166874157 | 9.7695703693  | -0.1380819392 |
| C98  | 5.5663873108 | 12.1091530879 | 0.3959700158  |
| H99  | 5.2075360689 | 12.7028892992 | -0.4529073543 |
| H100 | 6.1729103750 | 12.7660364944 | 1.0294866725  |
| H101 | 6.2254061165 | 11.3219661546 | 0.0068094101  |
| C102 | 4.9342128121 | 10.6563192577 | 2.3467580911  |
| H103 | 5.5818981955 | 9.8500292654  | 1.9781687884  |
| H104 | 5.5262055114 | 11.2653973391 | 3.0396849854  |
| H105 | 4.1154933458 | 10.1999395512 | 2.9163119061  |

Fe(III)

|     |               |               |               |
|-----|---------------|---------------|---------------|
| Y1  | 0.2607033315  | 16.8758059999 | 4.8990520416  |
| Fe2 | 2.2578378921  | 12.9942463908 | 7.1382999815  |
| S3  | -0.9010739813 | 14.6558108207 | 6.4312298643  |
| S4  | 3.3137573191  | 16.0495709555 | 5.6151965188  |
| O5  | 0.4241410263  | 17.4611402554 | 6.9333418956  |
| O6  | 1.2001269989  | 15.6993133784 | 3.3992986055  |
| O7  | -1.3359594611 | 17.8318436113 | 4.1595142850  |
| C8  | 0.1149059947  | 13.2800287528 | 6.8026019575  |
| C9  | 0.3464438197  | 12.6729749606 | 8.0696783060  |
| H10 | 0.0689630767  | 13.0871017811 | 9.0289591426  |
| C11 | 1.0360963159  | 11.4484050959 | 7.8567982248  |
| H12 | 1.3552715519  | 10.7662301380 | 8.6348421987  |
| C13 | 1.2772735501  | 11.3112635638 | 6.4611333751  |
| H14 | 1.7933140375  | 10.4924361382 | 5.9765394947  |
| C15 | 0.7427440084  | 12.4623586184 | 5.8057565345  |
| H16 | 0.7757096421  | 12.6667654823 | 4.7416277015  |
| C17 | 3.6092170881  | 14.6260051906 | 6.5698558251  |
| C18 | 4.1209666316  | 13.3549510072 | 6.1729500224  |
| H19 | 4.3314189163  | 13.0509454393 | 5.1561709407  |
| C20 | 4.2741221029  | 12.5536156821 | 7.3406928026  |
| H21 | 4.6529295894  | 11.5389932871 | 7.3591953846  |
| C22 | 3.8033208196  | 13.3014209120 | 8.4575741829  |
| H23 | 3.7706580666  | 12.9678630249 | 9.4870628164  |
| C24 | 3.3471223096  | 14.5666090354 | 7.9802983390  |
| H25 | 2.9184208776  | 15.3646902546 | 8.5765529957  |
| C26 | -1.2233463196 | 15.5323951097 | 8.0417852664  |
| H27 | -1.9019038830 | 16.3184520875 | 7.6860273002  |
| H28 | -1.8092595749 | 14.8413755891 | 8.6551692431  |
| C29 | -0.0670676948 | 16.1075025801 | 8.7909026568  |
| C30 | 0.1611286377  | 15.6992639758 | 10.1040925068 |
| H31 | -0.4754208143 | 14.9221707857 | 10.5271840798 |
| C32 | 1.1275630134  | 16.3192825780 | 10.9028349991 |
| C33 | 1.8344359041  | 17.3678645731 | 10.3089073843 |
| H34 | 2.5685202846  | 17.8874935300 | 10.9148299502 |
| C35 | 1.6488115178  | 17.8339784596 | 8.9949056535  |
| C36 | 0.6856639218  | 17.1616010084 | 8.1992718580  |
| C37 | 3.9395864010  | 15.6753961783 | 3.9179186575  |
| H38 | 3.8083596328  | 16.6595472878 | 3.4480843603  |

|     |               |               |               |
|-----|---------------|---------------|---------------|
| H39 | 5.0161829142  | 15.4992389138 | 4.0060667850  |
| C40 | 3.2664714909  | 14.5990426894 | 3.1262514521  |
| C41 | 4.0471596001  | 13.5766176024 | 2.5919360137  |
| H42 | 5.1154625746  | 13.5708996117 | 2.8094046919  |
| C43 | 3.5000128390  | 12.5981150919 | 1.7575020234  |
| C44 | 2.1356966794  | 12.7148610241 | 1.4877043687  |
| H45 | 1.6896992129  | 11.9862465868 | 0.8202209700  |
| C46 | 1.2925967066  | 13.7221880214 | 1.9900186379  |
| C47 | 1.8768508746  | 14.6939802765 | 2.8459486262  |
| C48 | -2.3979630268 | 18.5716120490 | 3.6330356599  |
| H49 | -3.1894009424 | 17.9049881143 | 3.2644985987  |
| H50 | -2.8313098030 | 19.2333944714 | 4.3957151432  |
| H51 | -2.0593424679 | 19.1928260633 | 2.7924430431  |
| C54 | 2.4572640571  | 19.0889497077 | 8.5909852431  |
| C55 | 2.0323984625  | 20.2519407190 | 9.5149452148  |
| H56 | 2.2162713605  | 20.0320916582 | 10.5715926617 |
| H57 | 2.5949093550  | 21.1589708359 | 9.2627834136  |
| H58 | 0.9651828819  | 20.4724208966 | 9.3996086427  |
| C59 | 2.2552243122  | 19.5766662756 | 7.1462394661  |
| H60 | 1.2086735280  | 19.8010250500 | 6.9277904205  |
| H61 | 2.8378267034  | 20.4951564139 | 7.0050393698  |
| H62 | 2.6206416352  | 18.8459535908 | 6.4166851862  |
| C63 | 3.9663583476  | 18.8225436896 | 8.7743402253  |
| H64 | 4.5405172230  | 19.7229510810 | 8.5241633705  |
| H65 | 4.2251813281  | 18.5476230649 | 9.8023198173  |
| H66 | 4.3081256183  | 18.0164590605 | 8.1132165069  |
| C67 | 1.3137123390  | 15.9042349878 | 12.3696035123 |
| C68 | 2.4684211854  | 16.6556659637 | 13.0468741818 |
| H69 | 3.4245642287  | 16.4875857506 | 12.5364882740 |
| H70 | 2.2862909267  | 17.7355402810 | 13.0887739485 |
| H71 | 2.5802230830  | 16.3064712514 | 14.0794646763 |
| C72 | 0.0182906208  | 16.2100262172 | 13.1477834679 |
| H73 | -0.2182191308 | 17.2790954764 | 13.1076317273 |
| H74 | -0.8406473403 | 15.6623176522 | 12.7436984702 |
| H75 | 0.1276567066  | 15.9261274658 | 14.2015438946 |
| C76 | 1.6105177153  | 14.3948732272 | 12.4549305952 |
| H77 | 1.7196690142  | 14.0834314253 | 13.5004638001 |
| H78 | 0.8057712979  | 13.7915770200 | 12.0182443275 |
| H79 | 2.5442533626  | 14.1489158916 | 11.9336100848 |
| C80 | -0.1622076018 | 13.7236908115 | 1.4639923771  |
| C81 | -1.1146858448 | 14.7166471868 | 2.1486494032  |
| H82 | -1.2121668589 | 14.5186160379 | 3.2236186956  |
| H83 | -0.8075141182 | 15.7543024757 | 2.0115259096  |
| H84 | -2.1142386965 | 14.6016524905 | 1.7120961891  |
| C85 | -0.1183453605 | 14.0877126446 | -0.0358975239 |
| H86 | 0.3133351035  | 15.0842883595 | -0.1826260081 |
| H87 | 0.4829445296  | 13.3748196908 | -0.6102618719 |
| H88 | -1.1306804144 | 14.0910096476 | -0.4586907459 |
| C89 | -0.7950258956 | 12.3249747323 | 1.6242772975  |
| H90 | -1.8207649267 | 12.3354993236 | 1.2371330493  |
| H91 | -0.2562518357 | 11.5420226120 | 1.0820310380  |

|      |               |               |               |
|------|---------------|---------------|---------------|
| H92  | -0.8433392765 | 12.0287367397 | 2.6799613471  |
| C93  | 4.3884447412  | 11.4921309037 | 1.1710252457  |
| C94  | 3.6000989797  | 10.5225125789 | 0.2800100267  |
| H95  | 2.7989547738  | 10.0176170677 | 0.8329410270  |
| H96  | 3.1563430594  | 11.0291129632 | -0.5847055822 |
| H97  | 4.2715182214  | 9.7473219200  | -0.1059792877 |
| C98  | 5.5084260850  | 12.1259520670 | 0.3228311454  |
| H99  | 5.0908105881  | 12.7062138684 | -0.5075592363 |
| H100 | 6.1421815351  | 12.7965717279 | 0.9141295610  |
| H101 | 6.1550432773  | 11.3470080940 | -0.0991482117 |
| C102 | 5.0191586154  | 10.6797459138 | 2.3195606205  |
| H103 | 5.6599820881  | 9.8837707131  | 1.9218753029  |
| H104 | 5.6418336230  | 11.3054207805 | 2.9702414977  |
| H105 | 4.2441296282  | 10.2090308585 | 2.9373651053  |

L5\_Zr\_c

Fe(II)

|     |               |               |               |
|-----|---------------|---------------|---------------|
| Zr1 | 10.1352798640 | 0.4776890772  | 4.8470245942  |
| Fe2 | 11.1957799058 | 4.4451147954  | 7.0947152785  |
| S3  | 12.4126010086 | 1.2025189714  | 6.5075404018  |
| S4  | 8.6090135296  | 2.8823423465  | 5.3076746128  |
| O5  | 8.4548241556  | -0.0519184014 | 4.0522108326  |
| O6  | 11.3514166030 | -0.9436453917 | 4.3611438126  |
| O7  | 10.7413602689 | 1.9522535993  | 3.5056109603  |
| O8  | 9.7280934084  | 0.0898249076  | 6.8342636168  |
| C9  | 10.4185259084 | 0.0313113093  | 7.9675626226  |
| C10 | 9.8845976435  | -0.5584504434 | 9.1440988902  |
| C11 | 10.6960954541 | -0.5840980644 | 10.2824829326 |
| H12 | 10.2859792714 | -1.0336293032 | 11.1781546566 |
| C13 | 12.0072547422 | -0.0901762679 | 10.3373292602 |
| C14 | 12.5183619320 | 0.4651556287  | 9.1650998968  |
| H15 | 13.5437218348 | 0.8249270304  | 9.1198429122  |
| C16 | 11.7314017892 | 0.5536675228  | 8.0181927155  |
| C17 | 8.4723069137  | -1.1682659890 | 9.1488583919  |
| C18 | 8.0945502559  | -1.7491153275 | 10.5201928300 |
| H19 | 7.0768375542  | -2.1543945672 | 10.4704558630 |
| H20 | 8.1059501370  | -0.9869315919 | 11.3090359270 |
| H21 | 8.7581333618  | -2.5687597635 | 10.8211057776 |
| C22 | 8.3979867553  | -2.3147470926 | 8.1188799658  |
| H23 | 8.6166861273  | -1.9572234807 | 7.1100556599  |
| H24 | 7.3922039384  | -2.7548318589 | 8.1182290463  |
| H25 | 9.1133994110  | -3.1081346521 | 8.3680366341  |
| C26 | 7.4295119862  | -0.0857609133 | 8.8027448548  |
| H27 | 7.6233572033  | 0.3536447591  | 7.8216873819  |
| H28 | 7.4386747568  | 0.7154441822  | 9.5526874662  |
| H29 | 6.4220343904  | -0.5215644166 | 8.7919532877  |
| C30 | 12.8778069768 | -0.1658467226 | 11.6002113629 |
| C31 | 12.1188071550 | -0.7600133528 | 12.7952132034 |
| H32 | 11.2319455309 | -0.1671049157 | 13.0499252639 |

|     |               |               |               |
|-----|---------------|---------------|---------------|
| H33 | 12.7713018101 | -0.7741771073 | 13.6766271486 |
| H34 | 11.7997595761 | -1.7914346750 | 12.6058142283 |
| C35 | 14.1085728455 | -1.0504761721 | 11.3224928009 |
| H36 | 13.8045835582 | -2.0693054535 | 11.0549857208 |
| H37 | 14.7496424292 | -1.1082650293 | 12.2119238777 |
| H38 | 14.7143862692 | -0.6562632656 | 10.4988364412 |
| C39 | 13.3442536588 | 1.2509477430  | 11.9912704951 |
| H40 | 13.9429577648 | 1.7162085730  | 11.2001379789 |
| H41 | 13.9637493286 | 1.2176432268  | 12.8966288918 |
| H42 | 12.4856624190 | 1.9030917797  | 12.1918647707 |
| C43 | 9.2834707116  | 4.0280727049  | 6.4860124626  |
| C44 | 9.4448793344  | 3.7095220495  | 7.8697391817  |
| H45 | 9.3284141981  | 2.7286417300  | 8.3103716804  |
| C46 | 9.8227671134  | 4.9051314042  | 8.5462351409  |
| H47 | 10.0580791763 | 4.9852833684  | 9.5997251412  |
| C48 | 9.9013498740  | 5.9540731931  | 7.5860528527  |
| H49 | 10.2087437603 | 6.9738678546  | 7.7799439857  |
| C50 | 9.5696936913  | 5.4154510416  | 6.3082252472  |
| H51 | 9.5657218898  | 5.9416964138  | 5.3634774000  |
| C52 | 12.5559778090 | 2.9535861229  | 6.7704210951  |
| C53 | 12.8713892911 | 3.6563435082  | 7.9733852642  |
| H54 | 12.8936508891 | 3.2295647347  | 8.9665805820  |
| C55 | 13.0865441613 | 5.0228070420  | 7.6302088114  |
| H56 | 13.2985087076 | 5.8227587795  | 8.3282937888  |
| C57 | 12.9101528284 | 5.1632863689  | 6.2236014830  |
| H58 | 12.9660173159 | 6.0874882984  | 5.6629585300  |
| C59 | 12.5785798995 | 3.8868300111  | 5.6876847153  |
| H60 | 12.3462904708 | 3.6543841508  | 4.6578657880  |
| C61 | 9.0275906427  | 3.5872007382  | 3.7316550147  |
| C62 | 10.0722359375 | 2.9858088874  | 2.9955686295  |
| C63 | 10.3674107549 | 3.5119171884  | 1.7040274117  |
| C64 | 9.6006640479  | 4.5875836971  | 1.2563823146  |
| H65 | 9.8235587183  | 4.9902186791  | 0.2735007997  |
| C66 | 8.5469366889  | 5.1799166371  | 1.9746355162  |
| C67 | 8.2674198926  | 4.6463179398  | 3.2268980471  |
| H68 | 7.4551174757  | 5.0306217522  | 3.8357623128  |
| C69 | 11.4720779152 | 2.8980169643  | 0.8258929466  |
| C70 | 12.8327249722 | 2.9767700549  | 1.5464665822  |
| H71 | 13.6193593665 | 2.5426438362  | 0.9158242643  |
| H72 | 12.8121947055 | 2.4284656304  | 2.4906527559  |
| H73 | 13.1051963144 | 4.0198557916  | 1.7504585405  |
| C74 | 11.1320095776 | 1.4254602223  | 0.5161080679  |
| H75 | 10.1794003216 | 1.3506839913  | -0.0226862614 |
| H76 | 11.0583075532 | 0.8352662519  | 1.4318214805  |
| H77 | 11.9128100494 | 0.9838435741  | -0.1168115609 |
| C78 | 11.6170207986 | 3.6306506041  | -0.5167917765 |
| H79 | 12.4138360629 | 3.1555311650  | -1.1012524157 |
| H80 | 11.8899975313 | 4.6848163506  | -0.3855151948 |
| H81 | 10.6994096856 | 3.5820801907  | -1.1158464729 |
| C82 | 7.7580074882  | 6.3448490682  | 1.3590019981  |
| C83 | 6.6207450793  | 6.8193062744  | 2.2733571742  |

|      |               |               |               |
|------|---------------|---------------|---------------|
| H84  | 6.0874492409  | 7.6522879310  | 1.7998731381  |
| H85  | 6.9940834514  | 7.1749931663  | 3.2412451317  |
| H86  | 5.8907064022  | 6.0223866015  | 2.4584560431  |
| C87  | 7.1381613659  | 5.8991766552  | 0.0193207638  |
| H88  | 6.5725658757  | 6.7229756187  | -0.4347267887 |
| H89  | 6.4524870652  | 5.0565231229  | 0.1668421532  |
| H90  | 7.9017443704  | 5.5856520411  | -0.7009140153 |
| C91  | 8.7058442437  | 7.5344290960  | 1.1101043284  |
| H92  | 9.5246201721  | 7.2679978604  | 0.4323014387  |
| H93  | 9.1506612634  | 7.8836525615  | 2.0496246523  |
| H94  | 8.1599214385  | 8.3732737747  | 0.6594270708  |
| C96  | 12.2210390874 | -1.9442246345 | 3.9422307141  |
| H97  | 11.7617347304 | -2.9322233916 | 4.0789829141  |
| H98  | 12.4703259843 | -1.8176084040 | 2.8805614491  |
| H99  | 13.1510562535 | -1.9093576658 | 4.5249975853  |
| C99  | 7.4065775876  | -0.5232209392 | 3.2686952512  |
| H100 | 6.4801637530  | -0.5613926779 | 3.8562761324  |
| H101 | 7.2459306719  | 0.1365660726  | 2.4060539410  |
| H102 | 7.6264187661  | -1.5336326985 | 2.8974706579  |

Fe(III)

|     |               |               |               |
|-----|---------------|---------------|---------------|
| Zr1 | 10.1350972635 | 0.2745882097  | 4.7130996153  |
| Fe2 | 11.1495552290 | 4.3093831211  | 7.0379608396  |
| S3  | 12.4890017656 | 1.0818887352  | 6.3901833284  |
| S4  | 8.4710005157  | 2.6748016423  | 5.2994388597  |
| O5  | 8.4254576520  | -0.2057236502 | 3.9861759445  |
| O6  | 11.3875691404 | -1.0878544274 | 4.1983665681  |
| O7  | 10.6665991696 | 1.9040527971  | 3.5414995696  |
| O8  | 9.8105298085  | 0.0223132167  | 6.7308496927  |
| C9  | 10.4773023114 | 0.0190947938  | 7.8844040672  |
| C10 | 9.8935146112  | -0.4214107201 | 9.1034826842  |
| C11 | 10.6824431142 | -0.3583366766 | 10.2581581594 |
| H12 | 10.2308463873 | -0.6814967735 | 11.1868451358 |
| C13 | 12.0179894625 | 0.0699727419  | 10.2972148319 |
| C14 | 12.5829765827 | 0.4658815478  | 9.0856509703  |
| H15 | 13.6284955907 | 0.7593686735  | 9.0292994477  |
| C16 | 11.8126035653 | 0.4825366035  | 7.9222079442  |
| C17 | 8.4517756394  | -0.9574177343 | 9.1521285826  |
| C18 | 8.0313990184  | -1.3588271118 | 10.5744664416 |
| H19 | 7.0011050456  | -1.7306955104 | 10.5522102360 |
| H20 | 8.0560462241  | -0.5114292780 | 11.2703824028 |
| H21 | 8.6578279253  | -2.1609163960 | 10.9814636787 |
| C22 | 8.3411667268  | -2.2102574649 | 8.2597222741  |
| H23 | 8.5823978657  | -1.9855703448 | 7.2183231867  |
| H24 | 7.3194881958  | -2.6070450595 | 8.2964015112  |
| H25 | 9.0196786508  | -2.9966605781 | 8.6099762041  |
| C26 | 7.4644086253  | 0.1232520277  | 8.6682504792  |
| H27 | 7.6795182994  | 0.4355888998  | 7.6435644753  |
| H28 | 7.4969849140  | 1.0025341949  | 9.3249473269  |
| H29 | 6.4394535283  | -0.2654874342 | 8.6948605334  |

|     |               |               |               |
|-----|---------------|---------------|---------------|
| C30 | 12.8481846075 | 0.1079693525  | 11.5896650803 |
| C31 | 12.0312228433 | -0.3181678543 | 12.8176164558 |
| H32 | 11.1653361581 | 0.3340953096  | 12.9825151687 |
| H33 | 12.6591266382 | -0.2617096338 | 13.7137158857 |
| H34 | 11.6745788384 | -1.3509798193 | 12.7345283403 |
| C35 | 14.0547308264 | -0.8416140743 | 11.4558087321 |
| H36 | 13.7255621933 | -1.8737364403 | 11.2926869680 |
| H37 | 14.6602477447 | -0.8192365623 | 12.3697595632 |
| H38 | 14.7066437502 | -0.5619983737 | 10.6205043017 |
| C39 | 13.3542561904 | 1.5445668455  | 11.8307433123 |
| H40 | 14.0074050128 | 1.8907380393  | 11.0203198606 |
| H41 | 13.9363587563 | 1.5953225588  | 12.7583180396 |
| H42 | 12.5166499913 | 2.2470917769  | 11.9222859641 |
| C43 | 9.1111700819  | 3.8397779691  | 6.4519637202  |
| C44 | 9.3659170072  | 3.5651550870  | 7.8330423110  |
| H45 | 9.2703239038  | 2.5993682466  | 8.3121457248  |
| C46 | 9.7393858468  | 4.7913208137  | 8.4646241893  |
| H47 | 9.9811185318  | 4.9159465077  | 9.5125147731  |
| C48 | 9.7625937954  | 5.8078251394  | 7.4679295173  |
| H49 | 10.0436991145 | 6.8433405199  | 7.6143907412  |
| C50 | 9.4048804571  | 5.2167724955  | 6.2254804170  |
| H51 | 9.3647528414  | 5.7104606552  | 5.2636077691  |
| C52 | 12.6283044429 | 2.8182604592  | 6.6787496913  |
| C53 | 12.9143517368 | 3.4952329242  | 7.9027345159  |
| H54 | 12.9399930427 | 3.0386718905  | 8.8827152757  |
| C55 | 13.1102263673 | 4.8705640208  | 7.6150787123  |
| H56 | 13.3114635338 | 5.6435608650  | 8.3467065058  |
| C57 | 12.9162113000 | 5.0657034791  | 6.2207098140  |
| H58 | 12.9676408967 | 6.0116057578  | 5.6963985762  |
| C59 | 12.6035715808 | 3.8019542201  | 5.6374555146  |
| H60 | 12.3873940232 | 3.6041088273  | 4.5962861449  |
| C61 | 8.8745492198  | 3.4531869399  | 3.7563203016  |
| C62 | 9.9897412457  | 2.9491913520  | 3.0534302082  |
| C63 | 10.3571186789 | 3.6057333225  | 1.8424608774  |
| C64 | 9.5817234172  | 4.6959963851  | 1.4453385049  |
| H65 | 9.8623894356  | 5.2009224005  | 0.5280742386  |
| C66 | 8.4527395859  | 5.1860929995  | 2.1288469739  |
| C67 | 8.0992434645  | 4.5242906671  | 3.2977215719  |
| H68 | 7.2285859771  | 4.8218805396  | 3.8739370401  |
| C69 | 11.5455407946 | 3.1245793908  | 0.9908290930  |
| C70 | 12.8465048013 | 3.1458806726  | 1.8170922433  |
| H71 | 13.6937337094 | 2.8414570042  | 1.1913356222  |
| H72 | 12.7930218972 | 2.4581099626  | 2.6644101234  |
| H73 | 13.0583770669 | 4.1582758479  | 2.1853710270  |
| C74 | 11.2703628571 | 1.6925027004  | 0.4909835982  |
| H75 | 10.3655902746 | 1.6637489709  | -0.1267995226 |
| H76 | 11.1441238793 | 0.9944699899  | 1.3219030198  |
| H77 | 12.1084993572 | 1.3424033399  | -0.1236094682 |
| C78 | 11.7738412210 | 4.0154013465  | -0.2407936022 |
| H79 | 12.6323177275 | 3.6346359745  | -0.8049678603 |
| H80 | 11.9989889864 | 5.0531274273  | 0.0337721195  |

|      |               |               |               |
|------|---------------|---------------|---------------|
| H81  | 10.9141383880 | 4.0142876376  | -0.9203697816 |
| C82  | 7.6808591284  | 6.3926796083  | 1.5791362173  |
| C83  | 6.4956442311  | 6.7738385240  | 2.4763122606  |
| H84  | 5.9727906560  | 7.6371041358  | 2.0504815388  |
| H85  | 6.8183183682  | 7.0560057307  | 3.4863507876  |
| H86  | 5.7667412797  | 5.9594536626  | 2.5608183623  |
| C87  | 7.1384373667  | 6.0642635297  | 0.1739240531  |
| H88  | 6.5893761118  | 6.9230070758  | -0.2301959266 |
| H89  | 6.4543523163  | 5.2088167490  | 0.2051956277  |
| H90  | 7.9422195628  | 5.8256148612  | -0.5307566452 |
| C91  | 8.6278760792  | 7.6062420997  | 1.4912490445  |
| H92  | 9.4840827893  | 7.4137428681  | 0.8357808347  |
| H93  | 9.0169401180  | 7.8760929219  | 2.4807007659  |
| H94  | 8.0949455270  | 8.4766859418  | 1.0911915760  |
| C96  | 12.1285081476 | -2.1928286140 | 3.7610135272  |
| H97  | 11.4594199768 | -3.0230994149 | 3.5080315717  |
| H98  | 12.7132714527 | -1.9232239857 | 2.8741113282  |
| H99  | 12.8142265583 | -2.5170526887 | 4.5524337973  |
| C99  | 7.2957226801  | -0.6729493813 | 3.3027421085  |
| H100 | 6.4149514569  | -0.6068969999 | 3.9514191408  |
| H101 | 7.1243738367  | -0.0683335865 | 2.4048094249  |
| H102 | 7.4405661207  | -1.7179431246 | 3.0062207936  |

L6\_Y\_a

Fe(II)

|     |               |               |               |
|-----|---------------|---------------|---------------|
| Y1  | 0.2485893030  | 16.5701235410 | 5.4357942609  |
| Fe2 | 2.3920932040  | 13.3220338373 | 6.8533681257  |
| S3  | 3.0345910105  | 16.8178749824 | 6.4148340883  |
| S4  | -0.8201222972 | 13.8841332711 | 5.3670169888  |
| O5  | -0.9836611881 | 17.9949663311 | 4.7168210624  |
| O7  | 0.2883592511  | 16.7962694073 | 7.5924757995  |
| O8  | 1.0885608856  | 15.5196210705 | 3.7220967395  |
| C9  | -1.7496812090 | 19.0227024749 | 4.1767997774  |
| C10 | 1.2150423003  | 17.1530899022 | 8.4560881223  |
| C11 | 0.8892206266  | 17.5015945916 | 9.7834038943  |
| C12 | 1.8709637665  | 17.9046950622 | 10.6779463952 |
| H13 | 1.5849945405  | 18.1741084769 | 11.6924770951 |
| C14 | 3.2140962399  | 17.9830008097 | 10.2942191955 |
| C15 | 3.5643668806  | 17.6426975989 | 8.9927305453  |
| H16 | 4.5979383560  | 17.7092706494 | 8.6612884686  |
| C17 | 2.5852802176  | 17.2173414985 | 8.0900715813  |
| C18 | 3.4347012811  | 15.0794141445 | 6.4840641212  |
| C19 | 4.0028948236  | 14.3685400180 | 7.5837552563  |
| H20 | 4.0905200671  | 14.7411130377 | 8.5953846892  |
| C21 | 4.4025349051  | 13.0869226855 | 7.1051819719  |
| H22 | 4.8334653086  | 12.2961979791 | 7.7062042708  |
| C23 | 4.0726461423  | 13.0044030181 | 5.7207263515  |
| H24 | 4.2099129258  | 12.1415706891 | 5.0816847608  |
| C25 | 3.4654540807  | 14.2310571010 | 5.3341174304  |



|     |               |               |               |
|-----|---------------|---------------|---------------|
| H26 | 3.0798385549  | 14.4903279215 | 4.3583006519  |
| C27 | 0.3608231379  | 13.1354315160 | 6.4777733767  |
| C28 | 0.5808628202  | 13.5954309367 | 7.8148110685  |
| H29 | 0.2195523010  | 14.5281770974 | 8.2277111590  |
| C30 | 1.3657081314  | 12.6145777178 | 8.4814458307  |
| H31 | 1.7329221857  | 12.6869529701 | 9.4970494527  |
| C32 | 1.6389604220  | 11.5607190114 | 7.5611831622  |
| H33 | 2.2536844344  | 10.6904675032 | 7.7531332373  |
| C34 | 1.0216343300  | 11.8806471467 | 6.3177052451  |
| H35 | 1.0608341137  | 11.3021099965 | 5.4044821793  |
| C36 | 0.6746318276  | 14.4320061072 | 3.1106716432  |
| C37 | -0.2150789063 | 13.5145084270 | 3.7323035962  |
| C38 | -0.6723844823 | 12.3707726761 | 3.0709978279  |
| H39 | -1.3744761624 | 11.7110720374 | 3.5754168701  |
| C40 | -0.2348753122 | 12.0875283103 | 1.7825219572  |
| C41 | 0.6542041125  | 12.9702361914 | 1.1598770119  |
| H42 | 0.9979943899  | 12.7628388461 | 0.1487043033  |
| C43 | 1.0998367847  | 14.1166321062 | 1.8021760177  |
| H45 | -1.7953939888 | 18.9515557060 | 3.0793831056  |
| H46 | -2.7803644351 | 18.9898059732 | 4.5608740527  |
| H47 | -1.3291417004 | 20.0068327717 | 4.4333058517  |
| H48 | -0.1563119379 | 17.4572554515 | 10.0767459203 |
| H49 | 3.9727428238  | 18.3162029161 | 10.9966982381 |
| H50 | -0.5888844997 | 11.1997692537 | 1.2663734683  |
| H51 | 1.7798680045  | 14.8075883806 | 1.3110446925  |

Fe(III)

|     |               |               |               |
|-----|---------------|---------------|---------------|
| Y1  | 0.2396446168  | 16.6354781202 | 5.4018209238  |
| Fe2 | 2.4367527652  | 13.2943578743 | 6.8434874208  |
| S3  | 3.0623473040  | 16.8432572189 | 6.3641832828  |
| S4  | -0.8964360979 | 13.9258128949 | 5.4736194069  |
| O5  | -0.8864142740 | 18.0862650442 | 4.6143230392  |
| O7  | 0.3908739278  | 16.5522789138 | 7.5585613481  |
| O8  | 1.1507023559  | 15.3486457333 | 3.9120961875  |
| C9  | -1.6283960676 | 19.1434426398 | 4.0728680591  |
| C10 | 1.2678295652  | 17.0493770469 | 8.4135781577  |
| C11 | 0.9141315745  | 17.3968712801 | 9.7307475813  |
| C12 | 1.8558988332  | 17.9339521242 | 10.5994551263 |
| H13 | 1.5509075811  | 18.2037707883 | 11.6072794216 |
| C14 | 3.1797798464  | 18.1495063230 | 10.2000265450 |
| C15 | 3.5613392888  | 17.8145321657 | 8.9068464866  |
| H16 | 4.5788644447  | 17.9868832388 | 8.5655175587  |
| C17 | 2.6204126115  | 17.2571959382 | 8.0342093931  |
| C18 | 3.5268095206  | 15.1395257637 | 6.4978966405  |
| C19 | 4.0175266823  | 14.4919034818 | 7.6677775809  |
| H20 | 4.0096266137  | 14.9144449465 | 8.6644737963  |
| C21 | 4.4967063090  | 13.2087779687 | 7.2929976098  |
| H22 | 4.9125444036  | 12.4708188545 | 7.9681434306  |
| C23 | 4.2721022309  | 13.0393921821 | 5.8974910451  |
| H24 | 4.5034576873  | 12.1548389939 | 5.3170464083  |

|     |               |               |               |
|-----|---------------|---------------|---------------|
| C25 | 3.6443728154  | 14.2208595737 | 5.4031708907  |
| H26 | 3.3190075542  | 14.4161751460 | 4.3899323921  |
| C27 | 0.2820756959  | 13.0755529225 | 6.4846590336  |
| C28 | 0.5902448819  | 13.3943930477 | 7.8459864240  |
| H29 | 0.2439127069  | 14.2740657015 | 8.3734861880  |
| C30 | 1.4081671126  | 12.3431654471 | 8.3596901869  |
| H31 | 1.8016888970  | 12.2812357880 | 9.3666417530  |
| C32 | 1.6460739404  | 11.4144954457 | 7.3052411389  |
| H33 | 2.2656288765  | 10.5277953732 | 7.3596767474  |
| C34 | 0.9728763004  | 11.8802707277 | 6.1430156722  |
| H35 | 0.9806565623  | 11.4220476050 | 5.1621977215  |
| C36 | 0.6265431703  | 14.3356568322 | 3.2442309899  |
| C37 | -0.3699196314 | 13.5092811741 | 3.8291205951  |
| C38 | -0.9538941059 | 12.4402107609 | 3.1412553026  |
| H39 | -1.7348342207 | 11.8530436826 | 3.6174962347  |
| C40 | -0.5332524158 | 12.1494475820 | 1.8499457332  |
| C41 | 0.4593814608  | 12.9409025827 | 1.2601064185  |
| H42 | 0.7851664390  | 12.7217677114 | 0.2465217702  |
| C43 | 1.0310728211  | 14.0120202269 | 1.9350671395  |
| H45 | -1.2436179697 | 19.4183636859 | 3.0819552280  |
| H46 | -2.6822237866 | 18.8554509747 | 3.9644912469  |
| H47 | -1.5792792371 | 20.0271433727 | 4.7228509295  |
| H48 | -0.1177373952 | 17.2558658578 | 10.0403917512 |
| H49 | 3.8997821118  | 18.5863030709 | 10.8853318858 |
| H50 | -0.9802982647 | 11.3249107312 | 1.3032172226  |
| H51 | 1.7852534783  | 14.6345861339 | 1.4615266136  |

L6\_Zr\_a

Fe(II)

|     |               |               |               |
|-----|---------------|---------------|---------------|
| Zr1 | -2.2662225799 | 9.3693528319  | 9.2997669493  |
| Fe2 | -0.7810512580 | 10.1646683184 | 4.6740397404  |
| S3  | 0.2810548007  | 9.5829035614  | 7.9734521777  |
| S4  | -3.5782532814 | 9.7853284479  | 6.7661989946  |
| O5  | -1.9787323134 | 11.4050024819 | 9.2217906994  |
| O6  | -2.2679234569 | 7.4797530159  | 8.4882966566  |
| O7  | -4.1030138245 | 9.3597956495  | 9.9378446996  |
| O8  | -1.1715437352 | 9.0062146158  | 10.8645042794 |
| C9  | 0.4755267805  | 9.6579498545  | 6.2195160896  |
| C10 | 1.0474477640  | 10.7024725283 | 5.4295369138  |
| H11 | 1.2857068534  | 11.6991129890 | 5.7713127469  |
| C12 | 1.1830752098  | 10.2125637791 | 4.0980611870  |
| H13 | 1.5501954648  | 10.7815123412 | 3.2533169236  |
| C14 | 0.6913194749  | 8.8769448708  | 4.0630281894  |
| H15 | 0.6213930291  | 8.2453510886  | 3.1869946349  |
| C16 | 0.2466779042  | 8.5302861950  | 5.3704624962  |
| H17 | -0.2027829420 | 7.5925000368  | 5.6705158994  |
| C18 | -2.7380305581 | 10.2849520874 | 5.2943577582  |
| C19 | -2.6501961802 | 9.6087968008  | 4.0386599346  |
| H20 | -2.9391731861 | 8.5859668755  | 3.8458451713  |

|     |               |               |               |
|-----|---------------|---------------|---------------|
| C21 | -2.0521533138 | 10.5054086731 | 3.1058609165  |
| H22 | -1.8146851830 | 10.2738656293 | 2.0753485375  |
| C23 | -1.7647563092 | 11.7248902766 | 3.7820190522  |
| H24 | -1.2725009571 | 12.5899125476 | 3.3569218819  |
| C25 | -2.1800143714 | 11.5923566316 | 5.1373151216  |
| H26 | -2.0769279192 | 12.3347099952 | 5.9184224833  |
| C27 | 0.7740950112  | 11.2372208788 | 8.5950680755  |
| H28 | 0.7721491475  | 11.0532191962 | 9.6772280873  |
| H29 | 1.8140851997  | 11.3969588037 | 8.2921683440  |
| C30 | -0.0709285506 | 12.4285323209 | 8.2590704393  |
| C31 | 0.5287168541  | 13.5226930191 | 7.6284611634  |
| H32 | 1.5718527232  | 13.4328765307 | 7.3345980525  |
| C33 | -0.1624564868 | 14.7109177892 | 7.4114128616  |
| C34 | -1.4753884145 | 14.7688904966 | 7.9022665312  |
| H35 | -2.0173097675 | 15.7008067740 | 7.7803185710  |
| C36 | -2.1272340219 | 13.7159720247 | 8.5501138004  |
| C37 | -1.4181041695 | 12.4865617448 | 8.6794063211  |
| C38 | -3.5276583700 | 13.9126313976 | 9.1609101686  |
| C39 | -4.5538993222 | 12.9525286991 | 8.5325257354  |
| H40 | -5.5538770438 | 13.1592466988 | 8.9367522703  |
| H41 | -4.3151067038 | 11.9099455117 | 8.7451506185  |
| H42 | -4.6014596333 | 13.0837449792 | 7.4445254779  |
| C43 | -4.0559310425 | 15.3410769897 | 8.9499899040  |
| H44 | -3.4003490116 | 16.0980765306 | 9.3970546322  |
| H45 | -5.0375232628 | 15.4335717553 | 9.4300855244  |
| H46 | -4.1893781835 | 15.5810780637 | 7.8877387614  |
| C47 | -3.4530597018 | 13.6675993851 | 10.6828147638 |
| H48 | -2.7696459731 | 14.3815162588 | 11.1591472348 |
| H49 | -3.1059752772 | 12.6555518573 | 10.9049105917 |
| H50 | -4.4456491500 | 13.7984401545 | 11.1336697820 |
| C51 | 0.4495239939  | 15.9272868957 | 6.7016616433  |
| C52 | -0.3842055062 | 16.2636181055 | 5.4485868036  |
| H53 | 0.0290884036  | 17.1400918696 | 4.9327121607  |
| H54 | -1.4263136958 | 16.4872892804 | 5.7020593492  |
| H55 | -0.3855888572 | 15.4239180769 | 4.7430803800  |
| C56 | 1.8967814821  | 15.6717064120 | 6.2583336079  |
| H57 | 2.5538165349  | 15.4581557547 | 7.1101882192  |
| H58 | 2.2919637427  | 16.5610533288 | 5.7529284335  |
| H59 | 1.9658354477  | 14.8341489004 | 5.5533075165  |
| C60 | 0.4492791469  | 17.1408389411 | 7.6531066721  |
| H61 | 1.0399630989  | 16.9328981896 | 8.5531656150  |
| H62 | -0.5637138342 | 17.4071853484 | 7.9742451457  |
| H63 | 0.8821503377  | 18.0195200027 | 7.1572001076  |
| C64 | -4.1518255691 | 8.0680172496  | 6.4634281578  |
| H65 | -4.7962313545 | 7.9152134801  | 7.3381467481  |
| H66 | -4.8009754025 | 8.0974891417  | 5.5823009261  |
| C67 | -3.1453010603 | 6.9627051340  | 6.3500875788  |
| C68 | -3.1559878361 | 6.1605487637  | 5.2056440402  |
| H69 | -3.8499041313 | 6.4192343505  | 4.4088761619  |
| C70 | -2.3300615530 | 5.0475987537  | 5.0832834346  |
| C71 | -1.5246574639 | 4.7426756882  | 6.1915603574  |

|      |               |              |               |
|------|---------------|--------------|---------------|
| H72  | -0.8998440803 | 3.8580665235 | 6.1303530434  |
| C73  | -1.4838357140 | 5.4893179635 | 7.3728577482  |
| C74  | -2.2830966904 | 6.6682639822 | 7.4293317174  |
| C75  | -0.6622723166 | 5.0036179555 | 8.5831615525  |
| C76  | 0.4145264904  | 6.0284365769 | 8.9829937960  |
| H77  | 1.0817205335  | 6.2495033725 | 8.1409209852  |
| H78  | 1.0299032884  | 5.6229533797 | 9.7973043442  |
| H79  | -0.0250136702 | 6.9647099261 | 9.3284948965  |
| C80  | -1.6138879508 | 4.7651391198 | 9.7741175537  |
| H81  | -2.1500443310 | 5.6787670129 | 10.0422861436 |
| H82  | -1.0427193362 | 4.4300299387 | 10.6499546086 |
| H83  | -2.3499766823 | 3.9879039387 | 9.5342390243  |
| C84  | 0.0617023254  | 3.6765935068 | 8.2996708380  |
| H85  | -0.6335133092 | 2.8683194962 | 8.0430007223  |
| H86  | 0.6050294507  | 3.3669681787 | 9.2005529572  |
| H87  | 0.7986045586  | 3.7707394802 | 7.4922520966  |
| C88  | -2.2877578165 | 4.1584651812 | 3.8323917562  |
| C89  | -0.8601948346 | 4.1666166151 | 3.2495958385  |
| H90  | -0.5628577853 | 5.1811555047 | 2.9582545122  |
| H91  | -0.8011754269 | 3.5268709167 | 2.3595027372  |
| H92  | -0.1242667959 | 3.7994220048 | 3.9733526694  |
| C93  | -2.6755498696 | 2.7132055086 | 4.2033871415  |
| H94  | -1.9964977118 | 2.2868979118 | 4.9500134643  |
| H95  | -2.6412325016 | 2.0669151900 | 3.3167596294  |
| H96  | -3.6909716251 | 2.6733243103 | 4.6148998469  |
| C97  | -3.2536090528 | 4.6442426764 | 2.7418927042  |
| H98  | -4.2959336920 | 4.6269467896 | 3.0825394878  |
| H99  | -3.1827464845 | 3.9894121179 | 1.8651755900  |
| H100 | -3.0172766713 | 5.6632136292 | 2.4113696532  |
| C114 | -0.6270855621 | 8.8040672506 | 12.1266892760 |
| H115 | 0.1538302786  | 9.5499656966 | 12.3343599092 |
| H116 | -1.3998334307 | 8.8917263587 | 12.9034927411 |
| H117 | -0.1776840427 | 7.8040823115 | 12.1969101312 |
| C105 | -5.3649031282 | 9.0345599677 | 10.4210228746 |
| H106 | -6.1319780071 | 9.6579083426 | 9.9409829891  |
| H107 | -5.6015171691 | 7.9778609822 | 10.2267314550 |
| H108 | -5.4169068085 | 9.2030991814 | 11.5055827546 |

Fe(III)

|     |               |               |               |
|-----|---------------|---------------|---------------|
| Zr1 | -2.3644345761 | 9.3409378505  | 9.4814716135  |
| Fe2 | -0.9777466924 | 10.1589329147 | 4.6379016358  |
| S3  | 0.1893503052  | 9.4415121490  | 7.8978837706  |
| S4  | -3.7360907385 | 9.7591169312  | 6.8307721737  |
| O5  | -1.9431395606 | 11.3224937796 | 9.2119557668  |
| O6  | -2.3814162225 | 7.5111065828  | 8.5613483645  |
| O7  | -4.1931278295 | 9.4145766308  | 10.0782527466 |
| O8  | -1.2020127653 | 8.9783861179  | 10.9751688350 |
| C9  | 0.4160874933  | 9.5559607266  | 6.1735509234  |
| C10 | 0.9450852498  | 10.6327746134 | 5.4021274511  |
| H11 | 1.1993392983  | 11.6137479141 | 5.7769177637  |

|     |               |               |               |
|-----|---------------|---------------|---------------|
| C12 | 1.0217934359  | 10.2140695314 | 4.0451764253  |
| H13 | 1.3782714802  | 10.8198190258 | 3.2214044369  |
| C14 | 0.5026401098  | 8.8915628518  | 3.9598918723  |
| H15 | 0.4108570156  | 8.2951319881  | 3.0616079880  |
| C16 | 0.0990140956  | 8.4900605402  | 5.2687808740  |
| H17 | -0.3429782126 | 7.5388069487  | 5.5416816369  |
| C18 | -3.0197887143 | 10.3069757571 | 5.3385214262  |
| C19 | -2.9648173121 | 9.6560048982  | 4.0713699219  |
| H20 | -3.2819269041 | 8.6442585401  | 3.8647107647  |
| C21 | -2.3726411859 | 10.5479333739 | 3.1348958019  |
| H22 | -2.1946844437 | 10.3314420960 | 2.0890239698  |
| C23 | -2.0196132390 | 11.7425670025 | 3.8236612940  |
| H24 | -1.5397432167 | 12.6129622960 | 3.3954291140  |
| C25 | -2.3870177559 | 11.5864131118 | 5.1940774440  |
| H26 | -2.2375410444 | 12.3101087367 | 5.9873494181  |
| C27 | 0.7757871590  | 11.0570398774 | 8.5575349912  |
| H28 | 0.7424838638  | 10.8541649815 | 9.6350023309  |
| H29 | 1.8275193066  | 11.1645458483 | 8.2739395009  |
| C30 | -0.0225510275 | 12.2718990848 | 8.2055210972  |
| C31 | 0.6085003797  | 13.3270586462 | 7.5369464832  |
| H32 | 1.6548551103  | 13.2105955095 | 7.2627576287  |
| C33 | -0.0535437878 | 14.5217137138 | 7.2738284834  |
| C34 | -1.3634180460 | 14.6291873110 | 7.7690610838  |
| H35 | -1.8789094075 | 15.5711936631 | 7.6187330300  |
| C36 | -2.0396360016 | 13.6242189692 | 8.4696664357  |
| C37 | -1.3629606977 | 12.3803579279 | 8.6352606439  |
| C38 | -3.4143321106 | 13.9022970024 | 9.1088446905  |
| C39 | -4.4964869634 | 12.9591378499 | 8.5541111899  |
| H40 | -5.4733796329 | 13.2248106456 | 8.9767600514  |
| H41 | -4.2970486625 | 11.9167429010 | 8.8068270747  |
| H42 | -4.5770668101 | 13.0488140839 | 7.4630593858  |
| C43 | -3.8911445040 | 15.3415169529 | 8.8518258867  |
| H44 | -3.2006741071 | 16.0884943031 | 9.2602078078  |
| H45 | -4.8586611245 | 15.4903972928 | 9.3441415859  |
| H46 | -4.0361915553 | 15.5482069458 | 7.7840968419  |
| C47 | -3.2956317749 | 13.7198258526 | 10.6366777239 |
| H48 | -2.5686061980 | 14.4247037150 | 11.0568187285 |
| H49 | -2.9824038513 | 12.7059358230 | 10.8977927700 |
| H50 | -4.2645730795 | 13.9126395367 | 11.1133681411 |
| C51 | 0.5916376032  | 15.7006321023 | 6.5311973335  |
| C52 | -0.2603942594 | 16.0587253389 | 5.2976815978  |
| H53 | 0.1756327744  | 16.9130153311 | 4.7662652392  |
| H54 | -1.2863561053 | 16.3278848521 | 5.5706121739  |
| H55 | -0.3087283334 | 15.2167807034 | 4.5949379172  |
| C56 | 2.0137902108  | 15.3767007366 | 6.0515962399  |
| H57 | 2.6909831716  | 15.1609891450 | 6.8862693178  |
| H58 | 2.4268022477  | 16.2361714066 | 5.5119407186  |
| H59 | 2.0305096365  | 14.5216272356 | 5.3630591391  |
| C60 | 0.6684159350  | 16.9236085377 | 7.4677920159  |
| H61 | 1.2735984750  | 16.7020871691 | 8.3542486031  |
| H62 | -0.3230152622 | 17.2393833013 | 7.8100453785  |

|      |               |               |               |
|------|---------------|---------------|---------------|
| H63  | 1.1260252850  | 17.7743212726 | 6.9482313746  |
| C64  | -4.2227821300 | 8.0129864762  | 6.5139615003  |
| H65  | -4.8257615962 | 7.8099961966  | 7.4067336712  |
| H66  | -4.8983996053 | 8.0076364869  | 5.6528855758  |
| C67  | -3.1180671849 | 7.0157904670  | 6.3684610529  |
| C68  | -3.0003509485 | 6.2941289113  | 5.1761774074  |
| H69  | -3.6948585644 | 6.5138285824  | 4.3685246665  |
| C70  | -2.0572970339 | 5.2811677103  | 5.0298160745  |
| C71  | -1.2939435591 | 4.9744929430  | 6.1676636625  |
| H72  | -0.5971204335 | 4.1478350466  | 6.0934726803  |
| C73  | -1.3867761405 | 5.6327488797  | 7.3985334953  |
| C74  | -2.2783592006 | 6.7417065612  | 7.4721013599  |
| C75  | -0.6243892843 | 5.0989333929  | 8.6267587795  |
| C76  | 0.3775936398  | 6.1292258690  | 9.1751192184  |
| H77  | 1.0942667869  | 6.4346197749  | 8.4030516715  |
| H78  | 0.9503450283  | 5.6847053421  | 9.9985580354  |
| H79  | -0.1215206714 | 7.0196424707  | 9.5602433403  |
| C80  | -1.6485571961 | 4.7388182678  | 9.7235924374  |
| H81  | -2.2400174474 | 5.6084021985  | 10.0213754951 |
| H82  | -1.1274037648 | 4.3576354657  | 10.6104270443 |
| H83  | -2.3343468769 | 3.9576072145  | 9.3754239733  |
| C84  | 0.1737913620  | 3.8242230841  | 8.3041292169  |
| H85  | -0.4656111309 | 3.0107326916  | 7.9427619556  |
| H86  | 0.6640849461  | 3.4700150603  | 9.2177606302  |
| H87  | 0.9633705778  | 4.0027905285  | 7.5635329218  |
| C88  | -1.8704137292 | 4.4749427312  | 3.7371266373  |
| C89  | -0.4040520555 | 4.5764948724  | 3.2701404368  |
| H90  | -0.1319079771 | 5.6163335472  | 3.0469941713  |
| H91  | -0.2512645194 | 3.9888211018  | 2.3570759804  |
| H92  | 0.2968260174  | 4.2022616834  | 4.0238908040  |
| C93  | -2.2173809713 | 2.9951665739  | 3.9979799525  |
| H94  | -1.5741335075 | 2.5560007265  | 4.7680815293  |
| H95  | -2.0892071955 | 2.4052659608  | 3.0822429265  |
| H96  | -3.2566415607 | 2.8876893670  | 4.3286892467  |
| C97  | -2.7692113764 | 4.9851756406  | 2.6024031637  |
| H98  | -3.8337678435 | 4.8764641432  | 2.8404991972  |
| H99  | -2.5800817768 | 4.4081681473  | 1.6903608495  |
| H100 | -2.5732208672 | 6.0400118417  | 2.3684710601  |
| C114 | -0.6098144545 | 8.7127011194  | 12.2151595828 |
| H115 | 0.4799634319  | 8.6534679522  | 12.1035837683 |
| H116 | -0.8474731482 | 9.5107267356  | 12.9289917175 |
| H117 | -0.9716964846 | 7.7579232706  | 12.6147855617 |
| C105 | -5.4373023671 | 9.2424079568  | 10.6949466537 |
| H106 | -6.1440731270 | 9.9955853968  | 10.3269094472 |
| H107 | -5.8362863771 | 8.2428622527  | 10.4795200564 |
| H108 | -5.3395274862 | 9.3544984594  | 11.7813444261 |
